# Supplementary material for: NNN manganese complex-catalyzed α-alkylation of methyl ketones using alcohols: an experimental and computational study
Source: Royal Society of Chemistry journal article supplement (doi:10.1039/d3dt04321e), 2024-01-01
Supplement: d3dt04321e1.pdf [file d3dt04321e1.pdf]

# NNN Manganese Complex Catalyzed $\alpha$ -Alkylation of Methyl ketones using Alcohols: An Experimental and Computational study

Sachin Jalwal<sup>a</sup>, Anitta Regina<sup>a</sup>, Vaishnavi Atreya<sup>a</sup>, Manikandan Paranjothy<sup>a,\*</sup> and Subrata Chakraborty<sup>a\*</sup>

Department of Chemistry, Indian Institute of Technology Jodhpur, Karwar, Jodhpur, 342037, Rajasthan

\*Corresponding author: Email: [subrata@iitj.ac.in](mailto:subrata@iitj.ac.in), [pmanikandan@iitj.ac.in](mailto:pmanikandan@iitj.ac.in)

## Supporting Information

### Table of Contents

|                                                                                                            |    |
|------------------------------------------------------------------------------------------------------------|----|
| 1. <b>Characterization of [(NN<sup>H</sup>N)Mn(CO)<sub>3</sub>]<sup>+</sup>Br<sup>-</sup> (Mn-1)</b> ..... | 1  |
| 2. <b>X-Ray crystallographic studies</b> .....                                                             | 1  |
| 3. <b>Characterization data for the stoichiometric reaction</b> .....                                      | 3  |
| 4. <b>Analytical data of isolated products</b> .....                                                       | 4  |
| 5. <b>Computational Studies</b> .....                                                                      | 11 |
| 6. <b>References</b> .....                                                                                 | 49 |

## 1. Characterization of $[(\text{NN}^{\text{H}}\text{N})\text{Mn}(\text{CO})_3]^+\text{Br}^-$ (Mn-1):

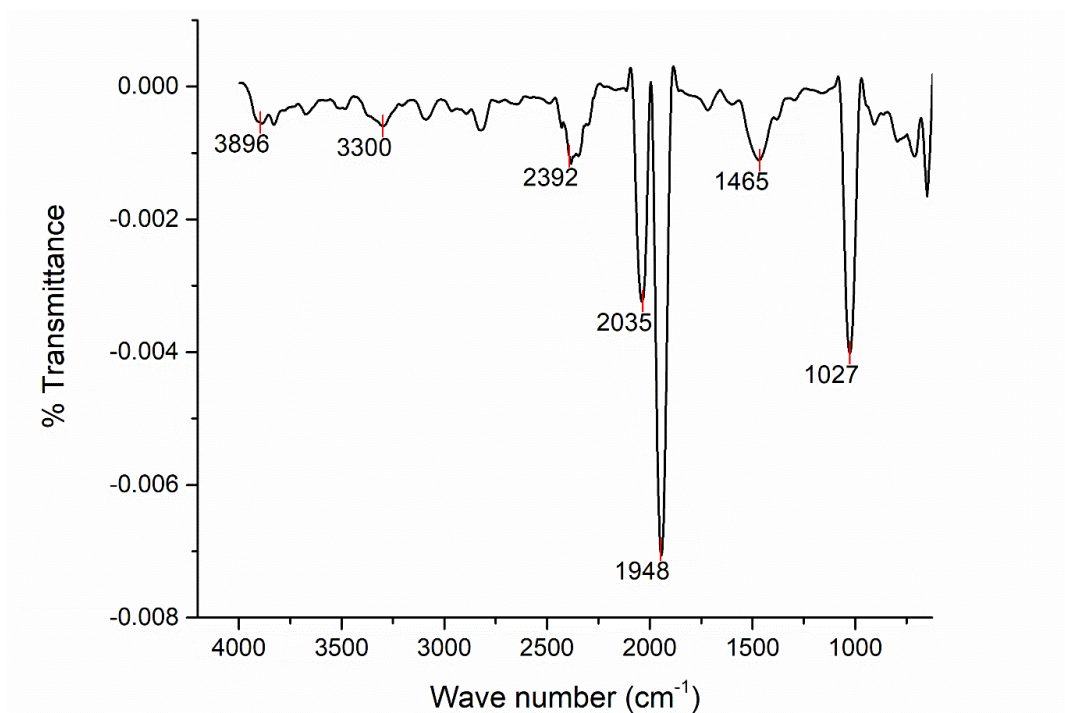

**Fig. S1** FT-IR spectra of Mn-1.

## 2. X-Ray crystallographic studies

Single crystals of  $\text{C}_{19}\text{H}_{14}\text{BrCl}_3\text{MnN}_3\text{O}_3$   $[(\text{NN}^{\text{H}}\text{NMn}(\text{CO})_3]^+\text{Br}^-$  were yellow in colour. A suitable crystal was selected and collected on Bruker D8 Venture Duo X-ray diffractometer equipped with a Microfocus X-ray source (operated at 50 W; 50 kV/1 mA) on a Bruker APEX-II CCD diffractometer. The crystal was kept at 296.15 K during data collection. Using Olex2,<sup>1</sup> the structure was solved with the SHELXT<sup>2</sup> structure solution program using Intrinsic Phasing and refined with the SHELXL<sup>3</sup> refinement package using Least Squares minimisation. The structures were examined using the Adsym subroutine in PLATON to assure that no additional symmetries could be applied to the model. **CCDC number: 2295408** for  $[(\text{NN}^{\text{H}}\text{NMn}(\text{CO})_3]\text{Br}$  contains the supplementary crystallographic data for this paper. The ORTEP drawing of  $[(\text{NN}^{\text{H}}\text{NMn}(\text{CO})_3]\text{Br}$  at the 30% probability level.

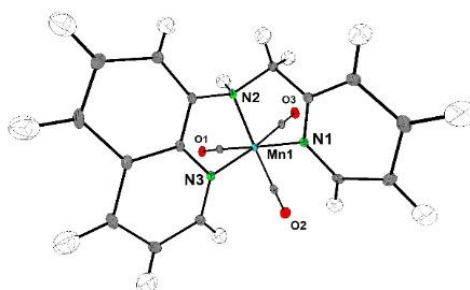

**Fig. S2** Molecular structure of  $[(\text{Mn}(\text{CO})_3(\text{NN}^{\text{H}}\text{N}))^+$  (Mn-1). Counter anion is omitted for clarity.

Crystal Data for  $C_{19}H_{14}BrCl_3MnN_3O_3$  ( $M = 573.53$  g/mol): triclinic, space group P-1 (no. 2),  $a = 10.0855(9)$  Å,  $b = 14.7980(11)$  Å,  $c = 16.4672(13)$  Å,  $\alpha = 101.388(2)^\circ$ ,  $\beta = 106.123(2)^\circ$ ,  $\gamma = 103.595(2)^\circ$ ,  $V = 2202.1(3)$  Å<sup>3</sup>,  $Z = 4$ ,  $T = 296.15$  K,  $\mu(\text{MoK}\alpha) = 2.804$  mm<sup>-1</sup>,  $D_{\text{calc}} = 1.730$  g/cm<sup>3</sup>, 64016 reflections measured ( $4.32^\circ \leq 2\theta \leq 56.734^\circ$ ), 10957 unique ( $R_{\text{int}} = 0.0754$ ,  $R_{\text{sigma}} = 0.0551$ ) which were used in all calculations. The final  $R_1$  was 0.0416 ( $I > 2\sigma(I)$ ) and  $wR_2$  was 0.0974 (all data).

**Table S1** Crystal data and structure refinement for  $[(\text{NN}^H\text{N})\text{Mn}(\text{CO})_3]^+\text{Br}^-$  (**Mn-1**)

|                                               |                                                                                        |
|-----------------------------------------------|----------------------------------------------------------------------------------------|
| Identification code                           | $[(\text{NN}^H\text{N})\text{Mn}(\text{CO})_3]^+\text{Br}^-$ ( <b>Mn-1</b> ) (2295408) |
| Empirical formula                             | $C_{19}H_{14}BrCl_3MnN_3O_3$                                                           |
| Formula weight                                | 573.53                                                                                 |
| Temperature/K                                 | 296.15                                                                                 |
| Crystal system                                | triclinic                                                                              |
| Space group                                   | P-1                                                                                    |
| $a/\text{Å}$                                  | 10.0855(9)                                                                             |
| $b/\text{Å}$                                  | 14.7980(11)                                                                            |
| $c/\text{Å}$                                  | 16.4672(13)                                                                            |
| $\alpha/^\circ$                               | 101.388(2)                                                                             |
| $\beta/^\circ$                                | 106.123(2)                                                                             |
| $\gamma/^\circ$                               | 103.595(2)                                                                             |
| Volume/Å <sup>3</sup>                         | 2202.1(3)                                                                              |
| $Z$                                           | 4                                                                                      |
| $\rho_{\text{calc}}/\text{g/cm}^3$            | 1.730                                                                                  |
| $\mu/\text{mm}^{-1}$                          | 2.804                                                                                  |
| $F(000)$                                      | 1136.0                                                                                 |
| Crystal size/mm <sup>3</sup>                  | $0.14 \times 0.12 \times 0.11$                                                         |
| Radiation                                     | MoK $\alpha$ ( $\lambda = 0.71073$ )                                                   |
| $2\theta$ range for data collection/ $^\circ$ | 4.32 to 56.734                                                                         |
| Index ranges                                  | $-13 \leq h \leq 13$ , $-19 \leq k \leq 15$ , $-21 \leq l \leq 21$                     |
| Reflections collected                         | 64016                                                                                  |
| Independent reflections                       | 10957 [ $R_{\text{int}} = 0.0754$ , $R_{\text{sigma}} = 0.0551$ ]                      |
| Data/restraints/parameters                    | 10957/0/549                                                                            |
| Goodness-of-fit on $F^2$                      | 1.021                                                                                  |
| Final R indexes [ $I \geq 2\sigma(I)$ ]       | $R_1 = 0.0416$ , $wR_2 = 0.0878$                                                       |
| Final R indexes [all data]                    | $R_1 = 0.0666$ , $wR_2 = 0.0974$                                                       |
| Largest diff. peak/hole / $e \text{ Å}^{-3}$  | 0.92/-0.81                                                                             |

**Table S2** Selected bond lengths and bond angles of  $[(\text{NN}^H\text{N})\text{Mn}(\text{CO})_3]^+\text{Br}^-$  (**Mn-1**).

| Bond Length [Å] |    |            | Bond Angle [deg.] |              |
|-----------------|----|------------|-------------------|--------------|
| Mn1-C1          | C1 | 1.8123(32) | O2-C2-Mn1         | 179.211(278) |
| Mn1-C2          | C2 | 1.8168(31) | C1-Mn1-C3         | 89.180(134)  |
| Mn1-C3          | C3 | 1.8146(29) | C1-Mn1-C2         | 89.773(138)  |
| Mn1-N1          | N1 | 2.0552(26) | C1-Mn1-N3         | 89.082(116)  |
| Mn1-N2          | N2 | 2.0675(28) | C1-Mn1-N1         | 173.933(118) |

|        |    |             |            |               |
|--------|----|-------------|------------|---------------|
| Mn1-N3 | N3 | 2.0522(22)  | C1-Mn1-N2  | 96.342(118)   |
| N2-H2  | H2 | 0.8786(427) | C3-Mn1-C2  | 89.670(137)   |
| O1-C1  | C1 | 1.1409(40)  | C3-Mn1-N3  | 174.489(119)  |
| O2-C2  | C2 | 1.1413(38)  | C3-Mn1-N1  | 95.260(119)   |
| O3-C3  | C3 | 1.1496(36)  | C3-Mn1-N2  | 93.637(119)   |
|        |    |             | C2-Mn1-N2  | 173.081(125)  |
|        |    |             | N3-Mn1-N1  | 86.116(97)    |
|        |    |             | H2-N2-C8   | 141.221(2498) |
|        |    |             | C10-N2-Mn1 | 110.947(177)  |

### 3. Characterisation data for the stoichiometric reaction:

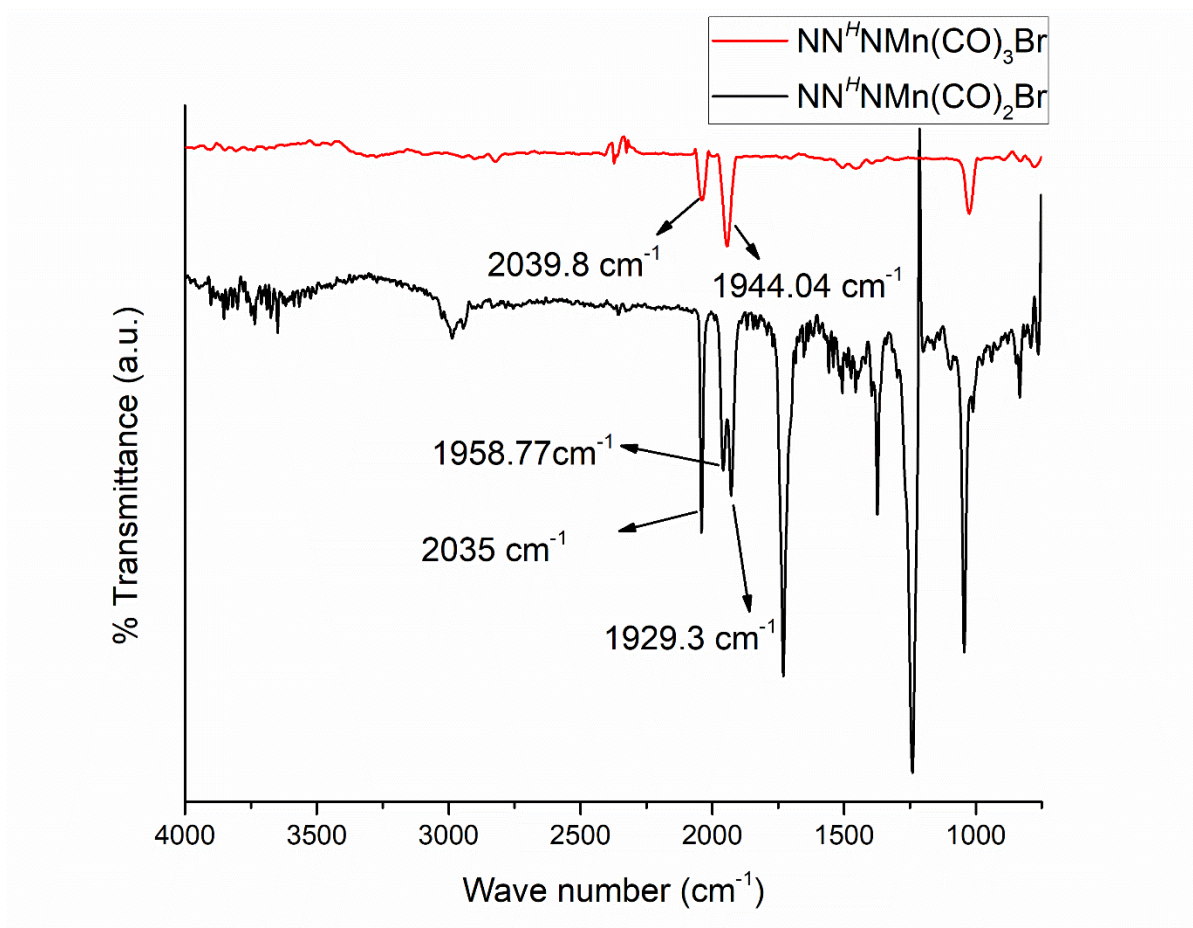

**Fig. S3** IR spectra for the comparison of [(NN<sup>H</sup>N)Mn(CO)<sub>3</sub>]<sup>+</sup>Br<sup>-</sup> (**Mn-1**) and (NN<sup>H</sup>N)Mn(CO)<sub>2</sub>Br.

**<sup>1</sup>H NMR:**

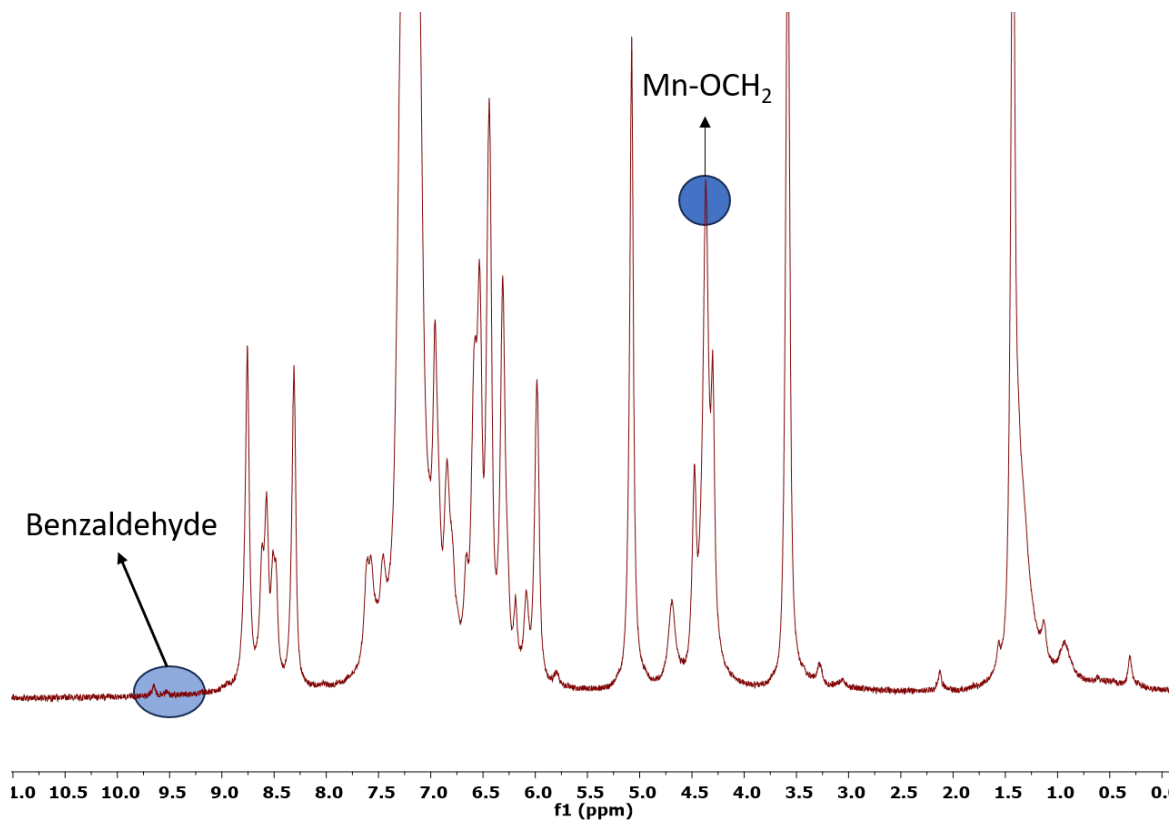

**Fig. S4:** <sup>1</sup>H NMR spectra of the reaction of **Mn-1** with benzyl alcohol and NaOH after 2 h at room temperature in tol-d<sub>8</sub>.

#### 4. Analytical data of isolated products:

##### 1-phenyl-3-(o-tolyl)propan-1-one<sup>6</sup> (**3a**)

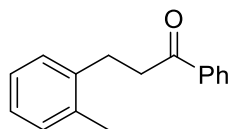

**<sup>1</sup>H NMR** (500 MHz, Chloroform-*d*) δ 8.02 – 7.99 (m, 2H), 7.60 (td, *J* = 7.2, 1.4 Hz, 1H), 7.54 – 7.44 (m, 2H), 7.26 – 7.13 (m, 4H), 3.32 – 3.25 (m, 2H), 3.13 – 3.07 (m, 2H), 2.39 (d, *J* = 1.8 Hz, 3H). **<sup>13</sup>C NMR** (126 MHz, Chloroform-*d*) δ 199.4, 139.4, 136.8, 136.0, 133.1, 130.3, 128.7, 128.6, 128.0, 126.3, 126.2, 39.1, 27.5, 19.3.

##### 3-(2-methoxyphenyl)-1-phenylpropan-1-one<sup>4</sup> (**3b**)

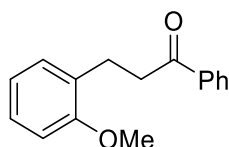

**$^1\text{H NMR}$**  (500 MHz, Chloroform-*d*)  $\delta$  8.05 – 7.97 (m, 2H), 7.65 – 7.54 (m, 1H), 7.54 – 7.44 (m, 2H), 7.24 (ddq,  $J = 7.4, 5.4, 1.7$  Hz, 2H), 6.98 – 6.85 (m, 2H), 3.86 (d,  $J = 1.1$  Hz, 3H), 3.30 (td,  $J = 7.6, 1.3$  Hz, 2H), 3.09 (ddd,  $J = 9.1, 6.8, 1.9$  Hz, 2H).  **$^{13}\text{C NMR}$**  (126 MHz, Chloroform-*d*)  $\delta$  200.0, 157.6, 137.0, 132.9, 130.2, 129.5, 128.5 (2C), 128.1 (2C), 127.5, 120.5, 110.2, 55.2, 38.9, 25.7.

### 3-(2-bromophenyl)-1-phenylpropan-1-one<sup>7</sup> (3c)

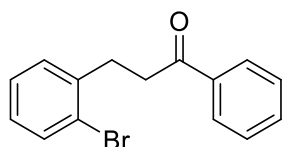

**$^1\text{H NMR}$**  (500 MHz, Chloroform-*d*)  $\delta$  8.01 (dd,  $J = 8.4, 1.5$  Hz, 2H), 7.63 – 7.55 (m, 2H), 7.48 (t,  $J = 7.8$  Hz, 2H), 7.35 (dd,  $J = 7.6, 1.8$  Hz, 1H), 7.32 – 7.24 (m, 1H), 7.11 (td,  $J = 7.6, 1.7$  Hz, 1H), 3.35 (dd,  $J = 8.3, 6.4$  Hz, 2H), 3.21 (dd,  $J = 8.7, 6.7$  Hz, 2H).  **$^{13}\text{C NMR}$**  (126 MHz, Chloroform-*d*)  $\delta$  199.0, 140.5, 136.7, 132.9, 130.8, 128.6, 128.0, 127.6, 124.4, 38.6, 30.8.

### 3-(4-bromophenyl)-1-phenylpropan-1-one<sup>5</sup> (3d)

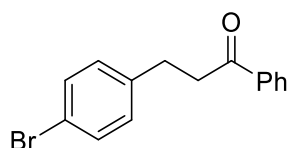

**$^1\text{H NMR}$**  (500 MHz, Chloroform-*d*)  $\delta$  8.01 – 7.92 (m, 2H), 7.64 – 7.55 (m, 1H), 7.51 – 7.46 (m, 2H), 7.44 (dd,  $J = 8.2, 1.6$  Hz, 2H), 7.19 – 7.13 (m, 2H), 3.36 – 3.27 (t, 2H), 3.06 (t,  $J = 7.5$  Hz, 2H).  **$^{13}\text{C NMR}$**  (126 MHz, Chloroform-*d*)  $\delta$  198.8, 140.2, 136.7, 133.2, 131.5 (2C), 130.3 (2C), 128.6 (2C), 128.0 (2C), 119.9, 40.0, 29.4.

### 3-(4-chlorophenyl)-1-phenylpropan-1-one<sup>8</sup> (3e)

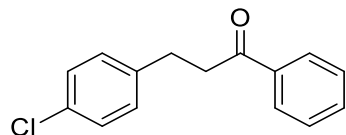

**$^1\text{H NMR}$**  (500 MHz, Chloroform-*d*)  $\delta$  7.98 (dd,  $J = 8.1, 1.4$  Hz, 2H), 7.63 – 7.55 (m, 1H), 7.48 (t,  $J = 7.7$  Hz, 2H), 7.32 – 7.26 (m, 2H), 7.24 – 7.18 (m, 2H), 3.31 (t,  $J = 7.5$  Hz, 2H), 3.07 (t,  $J = 7.5$  Hz, 2H).  **$^{13}\text{C NMR}$**  (126 MHz, Chloroform-*d*)  $\delta$  198.8, 139.7, 136.7, 133.2, 131.8, 129.8, 128.6, 128.6, 128.0, 40.1, 29.4.

### 3-(4-iodophenyl)-1-phenylpropan-1-one<sup>7</sup> (3f)

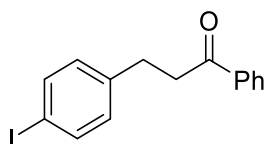

**<sup>1</sup>H NMR** (500 MHz, Chloroform-*d*)  $\delta$  8.01 – 7.93 (m, 2H), 7.63 (d,  $J$  = 7.9 Hz, 2H), 7.58 (t,  $J$  = 7.5 Hz, 1H), 7.48 (t,  $J$  = 7.6 Hz, 2H), 7.03 (d,  $J$  = 8.0 Hz, 2H), 3.30 (t,  $J$  = 7.6 Hz, 2H), 3.04 (t,  $J$  = 7.6 Hz, 2H). **<sup>13</sup>C NMR** (126 MHz, Chloroform-*d*)  $\delta$  198.8, 140.9 (2C), 137.5, 136.7, 133.2, 130.6 (2C), 128.6 (2C), 128.0 (2C), 91.2, 40.0, 29.5.

### 3-(4-fluorophenyl)-1-phenylpropan-1-one<sup>5</sup> (3g)

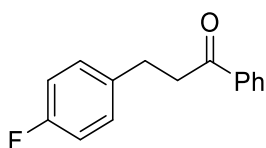

**<sup>1</sup>H NMR** (500 MHz, Chloroform-*d*)  $\delta$  8.04 – 7.92 (m, 2H), 7.63 – 7.55 (m, 1H), 7.53 – 7.44 (m, 2H), 7.27 – 7.18 (m, 2H), 7.05 – 6.95 (m, 2H), 3.31 (dd,  $J$  = 8.1, 7.0 Hz, 2H), 3.07 (t,  $J$  = 7.6 Hz, 2H). **<sup>13</sup>C NMR** (126 MHz, Chloroform-*d*)  $\delta$  199.0, 161.4 (d,  $^1J_{CF}$ =244), 136.8, 133.1, 129.8, 128.6, 128.0, 115.1, 40.4, 29.2. **<sup>19</sup>F NMR** (471 MHz, Chloroform-*d*)  $\delta$  -117.24.

### 1-phenyl-3-(p-tolyl)propan-1-one<sup>5</sup> (3h)

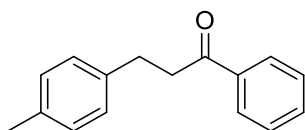

**<sup>1</sup>H NMR** (500 MHz, Chloroform-*d*)  $\delta$  8.02 (dd,  $J$  = 8.3, 1.4 Hz, 2H), 7.64 – 7.57 (m, 1H), 7.50 (dd,  $J$  = 8.4, 7.0 Hz, 2H), 7.25 – 7.15 (m, 4H), 3.34 (dd,  $J$  = 8.5, 7.0 Hz, 2H), 3.10 (t,  $J$  = 7.7 Hz, 2H), 2.39 (s, 3H). **<sup>13</sup>C NMR** (126 MHz, Chloroform-*d*)  $\delta$  199.3, 138.2, 136.9, 135.6, 133.0, 129.2, 128.6, 128.3, 128.1, 40.6, 29.7, 21.0.

### 3-(4-methoxyphenyl)-1-phenylpropan-1-one<sup>8</sup> (3i)

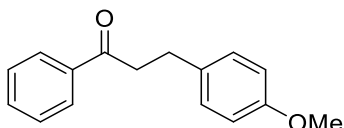

**<sup>1</sup>H NMR** (500 MHz, Chloroform-*d*)  $\delta$  7.99 – 7.93 (m, 2H), 7.56 (td,  $J$  = 7.2, 1.4 Hz, 1H), 7.49 – 7.42 (m, 2H), 7.18 (d,  $J$  = 8.5 Hz, 2H), 6.89 – 6.81 (m, 2H), 3.79 (s, 3H), 3.28 (dd,  $J$  = 8.3, 7.0 Hz, 2H), 3.02 (t,  $J$  = 7.7 Hz, 2H). **<sup>13</sup>C NMR** (126 MHz, Chloroform-*d*)  $\delta$  199.5, 158.0, 136.9, 133.2, 130.3, 114.0, 55.3, 40.8, 29.3.

### 3-(3-chlorophenyl)-1-phenylpropan-1-one<sup>8</sup> (3j)

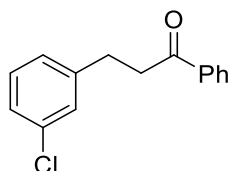

**<sup>1</sup>H NMR** (500 MHz, Chloroform-*d*)  $\delta$  7.98 (dd,  $J = 8.2, 1.4$  Hz, 2H), 7.66 – 7.54 (m, 1H), 7.49 (t,  $J = 7.7$  Hz, 2H), 7.28 (dd,  $J = 3.7, 1.9$  Hz, 1H), 7.26 – 7.19 (m, 2H), 7.16 (dt,  $J = 7.3, 1.6$  Hz, 1H), 3.32 (t,  $J = 7.6$  Hz, 2H), 3.08 (t,  $J = 7.6$  Hz, 2H). **<sup>13</sup>C NMR** (126 MHz, Chloroform-*d*)  $\delta$  198.7, 143.3 (2C), 136.7, 134.2, 133.2, 129.7, 128.6, 128.5, 128.0, 126.7, 126.3, 40.0, 29.6.

### 3-(3-fluorophenyl)-1-phenylpropan-1-one<sup>7</sup> (3k)

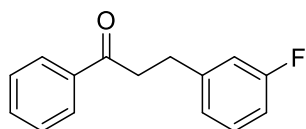

**<sup>1</sup>H NMR** (500 MHz, Chloroform-*d*)  $\delta$  7.96 (dd,  $J = 8.4, 1.4$  Hz, 2H), 7.62 – 7.52 (m, 1H), 7.46 (dd,  $J = 8.4, 7.2$  Hz, 2H), 7.25 (d,  $J = 6.5$  Hz, 1H), 7.03 (dt,  $J = 7.6, 1.2$  Hz, 1H), 6.96 (dt,  $J = 9.9, 2.2$  Hz, 1H), 6.93 – 6.84 (m, 1H), 3.31 (dd,  $J = 8.3, 6.9$  Hz, 2H), 3.08 (t,  $J = 7.6$  Hz, 2H). **<sup>13</sup>C NMR** (126 MHz, Chloroform-*d*)  $\delta$  198.9, 162.9 (d,  $^1J_{CF} = 245$  Hz), 143.9, 136.8, 133.3, 128.7, 128.1, 124.2, 115.4, 113.1, 40.1, 29.8. **<sup>19</sup>F NMR** (471 MHz, Chloroform-*d*)  $\delta$  -113.43.

### 1,3-diphenylpropan-1-one<sup>4</sup> (3l)

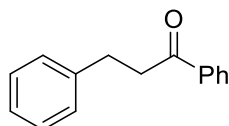

**<sup>1</sup>H NMR** (500 MHz, Chloroform-*d*)  $\delta$  7.99 (d,  $J = 7.0$  Hz, 1H), 7.64 – 7.54 (m, 1H), 7.48 (dd,  $J = 8.4, 7.1$  Hz, 2H), 7.33 (t,  $J = 7.5$  Hz, 2H), 7.30 – 7.27 (m, 3H), 7.27 – 7.21 (m, 1H), 3.42 – 3.27 (m, 2H), 3.10 (dd,  $J = 8.5, 7.0$  Hz, 2H). **<sup>13</sup>C NMR** (126 MHz, Chloroform-*d*)  $\delta$  199.2, 141.3, 136.8, 133.0, 128.6, 128.5, 128.4, 128.0, 126.1, 40.4, 30.1.

### 1-phenyl-3-(thiophen-2-yl)propan-1-one<sup>4</sup> (3m)

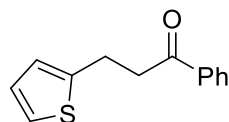

**<sup>1</sup>H NMR** (500 MHz, Chloroform-*d*)  $\delta$  8.05 – 7.95 (d, 2H), 7.65 – 7.55 (m, 1H), 7.49 (dd,  $J = 8.4, 7.1$  Hz, 2H), 7.16 (dd,  $J = 5.1, 1.2$  Hz, 1H), 6.95 (dd,  $J = 5.1, 3.4$  Hz, 1H), 6.92 – 6.86 (m, 1H), 3.40 (t,  $J = 7.9 - 6.5, 1.6$  Hz, 2H), 3.36 – 3.30 (t, 1.6 Hz, 2H). **<sup>13</sup>C NMR** (126 MHz, Chloroform-*d*)  $\delta$  198.6, 143.9, 136.7, 133.1, 128.6, 128.0, 126.8, 124.7, 123.4, 40.5, 24.2.

### 1-(5-chlorothiophen-2-yl)-3-(thiophen-2-yl)propan-1-one (3q)



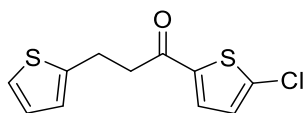

**$^1\text{H NMR}$**  (500 MHz, Chloroform-*d*)  $\delta$  7.50 (d,  $J = 4.1$  Hz, 1H), 7.15 (dd,  $J = 5.2, 1.2$  Hz, 1H), 6.97 (d,  $J = 4.1$  Hz, 1H), 6.94 (dd,  $J = 5.1, 3.4$  Hz, 1H), 6.88 – 6.86 (m, 1H), 3.30 (ddt,  $J = 7.7, 6.5, 1.1$  Hz, 2H), 3.23 (ddd,  $J = 8.3, 6.6, 1.5$  Hz, 2H).  **$^{13}\text{C NMR}$**  (126 MHz, Chloroform-*d*)  $\delta$  190.6, 143.2, 142.6, 139.7, 131.4, 127.6, 126.9, 124.8, 123.5, 40.3, 24.3. HRMS: calculated: 255.9783; found: 255.9802.

### 1-(4-methoxyphenyl)-3-phenylpropan-1-one<sup>5</sup> (3s)

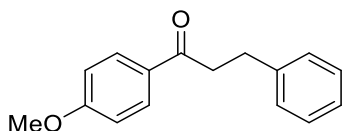

**$^1\text{H NMR}$**  (500 MHz, Chloroform-*d*)  $\delta$  7.94 (d,  $J = 9.0$  Hz, 2H), 7.32 – 7.27 (m, 2H), 7.27 – 7.24 (m, 3H), 7.23 – 7.18 (m, 1H), 6.97 – 6.87 (m, 2H), 3.86 (s, 3H), 3.25 (dd,  $J = 8.8, 7.0$  Hz, 2H), 3.06 (t,  $J = 7.8$  Hz, 2H).  **$^{13}\text{C NMR}$**  (126 MHz, Chloroform-*d*)  $\delta$  198.2, 163.8, 141.8, 130.6, 130.3, 128.8, 126.5, 114.0, 55.8, 40.4, 30.6.

### 1-(4-bromophenyl)-3-phenylpropan-1-one<sup>8</sup> (3t)

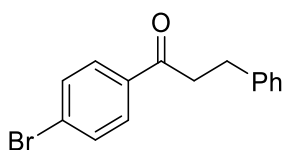

**$^1\text{H NMR}$**  (500 MHz, Chloroform-*d*)  $\delta$  7.87 – 7.81 (m, 2H), 7.64 – 7.59 (m, 2H), 7.34 (t,  $J = 7.5$  Hz, 2H), 7.31 – 7.20 (m, 3H), 3.34 – 3.25 (m, 2H), 3.09 (t,  $J = 7.6$  Hz, 2H).  **$^{13}\text{C NMR}$**  (126 MHz, Chloroform-*d*)  $\delta$  198.1, 141.0, 135.5, 131.9, 130.8, 129.6, 128.5, 128.2, 126.2, 40.4, 30.0.

### 1-(3-bromophenyl)-3-phenylpropan-1-one<sup>9</sup> (3u)

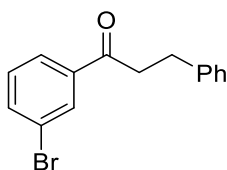

**$^1\text{H NMR}$**  (500 MHz, Chloroform-*d*)  $\delta$  8.08 (d,  $J = 2.0$  Hz, 1H), 7.87 (d,  $J = 7.8$  Hz, 1H), 7.68 (d,  $J = 8.3$  Hz, 1H), 7.36 – 7.28 (m, 3H), 7.27 – 7.19 (m, 3H), 3.28 (t,  $J = 7.6$  Hz, 2H), 3.07 (t,  $J = 7.6$  Hz, 2H).  **$^{13}\text{C NMR}$**  (126 MHz, Chloroform-*d*)  $\delta$  197.6, 140.8, 138.4, 135.7, 131.0, 130.0, 128.4, 128.2, 126.4, 126.1, 122.8, 40.4, 29.8.

### 3-phenyl-1-(3-(trifluoromethyl)phenyl)propan-1-one<sup>5</sup> (3v)

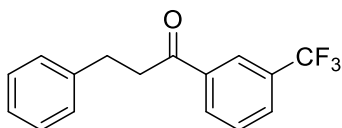

**<sup>1</sup>H NMR** (500 MHz, Chloroform-*d*)  $\delta$  8.23 (s, 1H), 8.16 (d,  $J = 7.8$  Hz, 1H), 7.89 – 7.81 (m, 1H), 7.63 (t,  $J = 7.8$  Hz, 1H), 7.34 (t,  $J = 7.5$  Hz, 2H), 7.30 (d,  $J = 1.6$  Hz, 1H), 7.28 (d,  $J = 1.4$  Hz, 1H), 7.27 – 7.23 (m, 1H), 3.36 (dd,  $J = 8.3, 7.0$  Hz, 2H), 3.12 (t,  $J = 7.6$  Hz, 2H). **<sup>13</sup>C NMR** (126 MHz, Chloroform-*d*)  $\delta$  197.8, 140.9, 137.3, 129.4, 128.6, 128.4, 128.1, 126.3, 124.9, 122.6, 40.6, 29.9. **<sup>19</sup>F NMR** (471 MHz, Chloroform-*d*)  $\delta$  -62.79.

**1-(5-chlorothiophen-2-yl)-3-phenylpropan-1-one<sup>5</sup> (3w)**

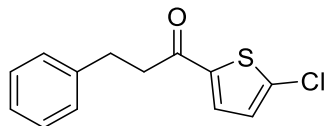

**<sup>1</sup>H NMR** (500 MHz, Chloroform-*d*)  $\delta$  7.47 (d,  $J = 4.1$  Hz, 1H), 7.33 (t,  $J = 7.5$  Hz, 2H), 7.26 (td,  $J = 7.3, 5.7$  Hz, 3H), 6.96 (d,  $J = 4.0$  Hz, 1H), 3.18 (dd,  $J = 8.2, 6.5$  Hz, 2H), 3.11 – 3.04 (m, 2H). **<sup>13</sup>C NMR** (126 MHz, Chloroform-*d*)  $\delta$  191.3, 142.7, 140.7, 139.5, 131.3, 128.6, 128.4, 127.6, 126.3, 40.3, 30.3.

**1-(4-bromophenyl)-3-(4-chlorophenyl)propan-1-one<sup>8</sup> (3x)**

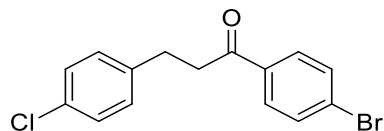

**<sup>1</sup>H NMR** (500 MHz, Chloroform-*d*)  $\delta$  7.83 (d,  $J = 8.5$  Hz, 2H), 7.62 (d,  $J = 8.6$  Hz, 2H), 7.32 – 7.25 (m, 2H), 7.19 (d,  $J = 8.5$  Hz, 2H), 3.26 (t,  $J = 7.5$  Hz, 2H), 3.06 (t,  $J = 7.5$  Hz, 2H). **<sup>13</sup>C NMR** (126 MHz, Chloroform-*d*)  $\delta$  197.8, 139.4, 135.4, 131.9, 129.8, 129.5, 128.6, 128.3, 40.1, 29.2.

**1-(4-bromophenyl)-3-(4-methoxyphenyl)propan-1-one<sup>8</sup> (3y)**

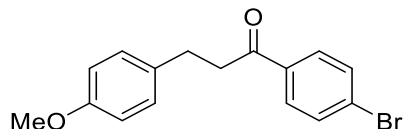

**<sup>1</sup>H NMR** (500 MHz, Chloroform-*d*)  $\delta$  7.83 (d,  $J = 8.6$  Hz, 2H), 7.61 (d,  $J = 8.5$  Hz, 2H), 7.18 (d,  $J = 8.6$  Hz, 2H), 6.92 – 6.81 (m, 2H), 3.81 (s, 3H), 3.25 (dd,  $J = 8.2, 6.9$  Hz, 2H), 3.02 (t,  $J = 7.6$  Hz, 2H). **<sup>13</sup>C NMR** (126 MHz, Chloroform-*d*)  $\delta$  198.3, 158.0, 135.6, 133.0, 131.9, 131.4, 129.8, 129.5, 129.3, 128.2, 113.9, 55.2, 40.6, 29.2.

**3-(4-chlorophenyl)-1-(4-methoxyphenyl)propan-1-one<sup>8</sup> (3z)**

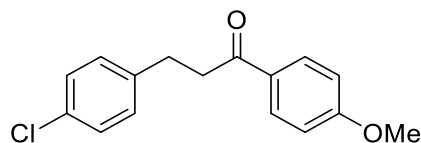

**<sup>1</sup>H NMR** (500 MHz, Chloroform-*d*)  $\delta$  7.95 (d,  $J = 8.9$  Hz, 2H), 7.27 (d,  $J = 8.4$  Hz, 2H), 7.20 (d,  $J = 8.4$  Hz, 2H), 6.94 (d,  $J = 8.8$  Hz, 2H), 3.88 (s, 3H), 3.24 (dd,  $J = 8.2, 6.9$  Hz, 2H), 3.05

(t,  $J = 7.6$  Hz, 2H).  $^{13}\text{C}$  NMR (126 MHz, Chloroform- $d$ )  $\delta$  197.4, 163.5, 139.9, 131.8, 130.3, 129.8, 128.5, 113.7, 55.4, 39.7, 29.5.

### 1,3-bis(4-methoxyphenyl)propan-1-one<sup>8</sup> (3aa)

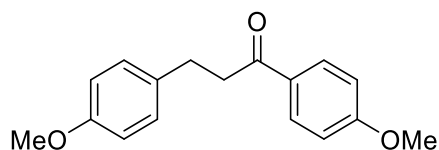

$^1\text{H}$  NMR (500 MHz, Chloroform- $d$ )  $\delta$  7.96 (d,  $J = 8.9$  Hz, 2H), 7.19 (d,  $J = 8.6$  Hz, 2H), 6.95 (d,  $J = 8.9$  Hz, 2H), 6.86 (d,  $J = 8.6$  Hz, 2H), 3.89 (s, 3H), 3.81 (s, 3H), 3.24 (dd,  $J = 8.5, 6.9$  Hz, 2H), 3.02 (dd,  $J = 8.5, 6.9$  Hz, 2H).  $^{13}\text{C}$  NMR (126 MHz, Chloroform- $d$ )  $\delta$  198.0, 163.4, 157.9, 133.5, 130.6, 130.3, 130.0, 129.3, 113.8, 55.4, 55.2, 40.3, 29.5.

### 3-phenyl-1-(4-(trifluoromethyl)phenyl)propan-1-one<sup>5</sup> (3ab)

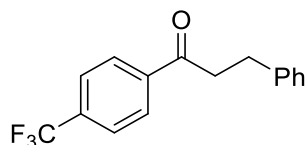

$^1\text{H}$  NMR (500 MHz, Chloroform- $d$ )  $\delta$  8.04 (d,  $J = 8.0$  Hz, 2H), 7.71 (d,  $J = 8.2$  Hz, 2H), 7.35 – 7.28 (m, 2H), 7.25 – 7.19 (m, 2H), 3.31 (dd,  $J = 8.0, 1.7$  Hz, 2H), 3.09 (t,  $J = 7.6$  Hz, 2H).  $^{13}\text{C}$  NMR (126 MHz, Chloroform- $d$ )  $\delta$  198.2, 146.1, 140.9 (2C), 139.5, 134.5, 129.60, 128.6, 128.41, 126.32, 125.69, 40.75, 29.94.  $^{19}\text{F}$  NMR (471 MHz, Chloroform- $d$ )  $\delta$  -63.11.

### 1-(4-(benzyloxy)phenyl)-3-phenylpropan-1-one<sup>8</sup> (3ac)

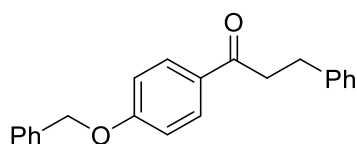

$^1\text{H}$  NMR (500 MHz, Chloroform- $d$ )  $\delta$  7.97 (d,  $J = 8.9$  Hz, 2H), 7.48 – 7.40 (m, 4H), 7.33 (t,  $J = 7.5$  Hz, 2H), 7.29 (s, 3H), 7.25 – 7.18 (m, 1H), 7.03 (d,  $J = 8.8$  Hz, 2H), 5.16 (s, 2H), 3.28 (dd,  $J = 8.6, 6.9$  Hz, 2H), 3.14 – 3.04 (m, 2H).  $^{13}\text{C}$  NMR (126 MHz, Chloroform- $d$ )  $\delta$  197.8, 162.6, 141.4, 136.1, 130.3, 128.7, 128.5, 128.4, 128.2, 127.4, 126.1, 114.6, 70.1, 40.1, 30.3.

### 1-(4-(tert-butyl)phenyl)-3-phenylpropan-1-one<sup>8</sup> (3ag)

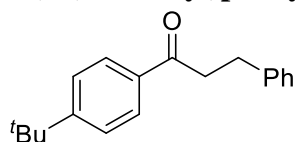

$^1\text{H}$  NMR (500 MHz, Chloroform- $d$ )  $\delta$  8.03 – 7.99 (m, 1H), 7.95 – 7.91 (m, 3H), 7.50 (dd,  $J = 8.6, 6.7$  Hz, 3H), 7.32 (d,  $J = 7.3$  Hz, 2H), 3.31 (dd,  $J = 8.5, 7.0$  Hz, 2H), 3.10 (dd,  $J = 8.6, 6.9$  Hz, 1H), 1.37 (s, 9H).  $^{13}\text{C}$  NMR (126 MHz, Chloroform- $d$ )  $\delta$  198.9, 156.8, 144.4, 141.45, 134.3, 130.4, 128.9, 128.5, 128.3, 128.0, 126.1, 40.3, 31.1, 30.2.

## Computational Studies:

The Electronic structure calculations were performed using M06-L/BS1 level of theory where BS1 includes double zeta basis set, SDD<sup>12</sup> with effective core potential<sup>11</sup> for Mn and 6-31G(d,p) basis sets for all other atoms. Calculations were done using CPCM model with toluene solvent (Refractive index=1.497 and the dielectric constant=2.4) and the Gibbs free energy were calculated at 298.15K and 1 atm using ORCA version 5.0.3.<sup>10</sup> The stationary states were characterized by vibrational modes analysis and the transition states were confirmed by the intrinsic reaction coordinate (IRC), which is the minimum energy pathway that leads to forward and backward minima. Fig. 2. represents the potential energy diagram where Gibbs free energies are relative to the reactants and H<sub>2</sub> energy added wherever necessary. The computed electronic energy, final Gibbs free energy and frequencies along with the coordinates of the identified stationary states are provided below. The cartesian coordinates are given in Angstrom units and the energies provided are in hartree.

### Cartesian coordinates of the stationary states:

#### 1. Mn-1a

Final Gibbs free energy = -1073.86461842 Eh

Total Energy = -1074.09948332 Eh

|   |           |           |           |
|---|-----------|-----------|-----------|
| C | -3.551667 | -0.095857 | 1.122032  |
| C | -2.791350 | -0.798919 | 0.166814  |
| C | -1.419258 | -0.863802 | 0.278055  |
| C | -0.764964 | -0.224244 | 1.355101  |
| C | -1.530929 | 0.479773  | 2.328045  |
| C | -2.935954 | 0.531804  | 2.181622  |
| N | 0.599136  | -0.325339 | 1.428432  |
| C | 1.216452  | 0.254738  | 2.450823  |
| C | 0.538164  | 0.964029  | 3.457699  |
| C | -0.829977 | 1.083443  | 3.398463  |
| N | -0.577325 | -1.561311 | -0.672455 |
| C | -0.650251 | -0.972099 | -2.030833 |
| C | 0.131259  | 0.304566  | -2.054155 |
| C | -0.210777 | 1.392587  | -2.848708 |
| C | 0.599973  | 2.522355  | -2.831418 |
| C | 1.723320  | 2.527920  | -2.009238 |
| C | 1.993685  | 1.408944  | -1.235845 |

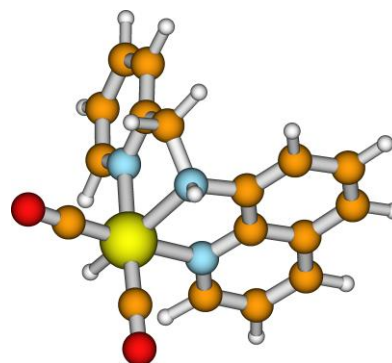

|    |           |           |           |
|----|-----------|-----------|-----------|
| N  | 1.219585  | 0.310418  | -1.255837 |
| Mn | 1.512343  | -1.403769 | -0.087582 |
| C  | 2.215103  | -2.290466 | -1.415005 |
| O  | 2.671503  | -2.894823 | -2.323373 |
| C  | 1.727722  | -2.788505 | 0.948314  |
| O  | 1.888386  | -3.717820 | 1.660786  |
| H  | -4.631280 | -0.055946 | 1.018907  |
| H  | -3.289016 | -1.299083 | -0.660152 |
| H  | -3.518591 | 1.070538  | 2.923740  |
| H  | 2.296358  | 0.142642  | 2.463662  |
| H  | 1.106713  | 1.412562  | 4.264803  |
| H  | -1.380921 | 1.626140  | 4.161463  |
| H  | -0.871544 | -2.531547 | -0.730544 |
| H  | -1.683720 | -0.799438 | -2.359355 |
| H  | -0.197506 | -1.697399 | -2.716748 |
| H  | -1.102185 | 1.350817  | -3.466820 |
| H  | 0.354132  | 3.384965  | -3.442560 |
| H  | 2.381376  | 3.388471  | -1.962985 |
| H  | 2.853791  | 1.358739  | -0.575208 |
| H  | 2.939158  | -0.802978 | 0.372838  |

## 2. Mn-1b

Final Gibbs free energy = -1072.70300127 Eh

Total Energy = -1072.91640701 Eh

|    |           |           |           |
|----|-----------|-----------|-----------|
| C  | -3.072803 | 1.964798  | 1.362851  |
| C  | -2.624956 | 0.928698  | 0.526319  |
| C  | -1.337602 | 0.396030  | 0.672050  |
| C  | -0.508855 | 0.970891  | 1.696378  |
| C  | -0.974340 | 2.012191  | 2.542737  |
| C  | -2.288418 | 2.504841  | 2.363540  |
| N  | 0.762848  | 0.481163  | 1.767084  |
| C  | 1.602529  | 0.988065  | 2.670690  |
| C  | 1.213772  | 1.982619  | 3.577135  |
| C  | -0.065251 | 2.493799  | 3.509470  |
| N  | -0.747585 | -0.615513 | -0.005406 |
| C  | -1.227587 | -1.067093 | -1.288879 |
| C  | -0.072354 | -1.045693 | -2.248286 |
| C  | -0.210163 | -1.062215 | -3.628878 |
| C  | 0.923002  | -1.059962 | -4.434683 |
| C  | 2.173998  | -1.031178 | -3.825521 |
| C  | 2.247368  | -1.010146 | -2.443698 |
| N  | 1.152092  | -1.042559 | -1.654040 |
| Mn | 1.130558  | -1.033276 | 0.343380  |
| C  | 2.868907  | -1.097614 | 0.619261  |
| O  | 4.030930  | -1.104618 | 0.818273  |
| C  | 1.027787  | -2.748417 | 0.504461  |
| O  | 0.910011  | -3.915035 | 0.622881  |

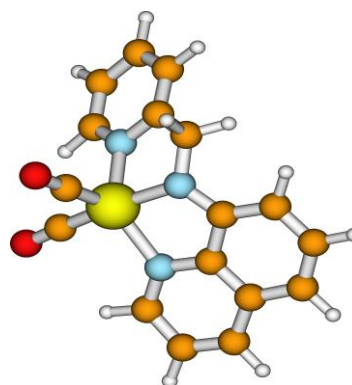

|   |           |           |           |
|---|-----------|-----------|-----------|
| H | -4.081118 | 2.343950  | 1.217608  |
| H | -3.298429 | 0.525362  | -0.224054 |
| H | -2.655250 | 3.299648  | 3.005205  |
| H | 2.610384  | 0.582865  | 2.674240  |
| H | 1.928345  | 2.351525  | 4.304403  |
| H | -0.384038 | 3.278611  | 4.191478  |
| H | -1.595214 | -2.106229 | -1.231405 |
| H | -2.067294 | -0.474274 | -1.674620 |
| H | -1.206391 | -1.077354 | -4.060067 |
| H | 0.831598  | -1.073651 | -5.516028 |
| H | 3.086692  | -1.017247 | -4.410160 |
| H | 3.199511  | -0.991387 | -1.923957 |

### 3. Mn-1c

Final Gibbs free energy = -1419.27328934 Eh  
 Total Energy = -1419.69537429 Eh

|    |           |           |           |
|----|-----------|-----------|-----------|
| C  | -0.870197 | 3.546037  | 2.050974  |
| C  | -0.928727 | 3.226973  | 0.678308  |
| C  | -0.142192 | 2.218780  | 0.168397  |
| C  | 0.719215  | 1.486622  | 1.021508  |
| C  | 0.829313  | 1.851947  | 2.392516  |
| C  | 0.003035  | 2.890142  | 2.886432  |
| N  | 1.422218  | 0.433245  | 0.488300  |
| C  | 2.270003  | -0.217989 | 1.280153  |
| C  | 2.480265  | 0.118020  | 2.624446  |
| C  | 1.751764  | 1.138140  | 3.190008  |
| N  | -0.076181 | 1.884583  | -1.236110 |
| C  | -1.363063 | 1.810590  | -1.959630 |
| C  | -1.236769 | 0.894297  | -3.143669 |
| C  | -2.080928 | 1.003045  | -4.242851 |
| C  | -1.969849 | 0.091929  | -5.287273 |
| C  | -0.997334 | -0.899281 | -5.205117 |
| C  | -0.174969 | -0.936590 | -4.089695 |
| N  | -0.284187 | -0.065899 | -3.071179 |
| Mn | 0.822307  | -0.047654 | -1.361165 |
| O  | -0.968317 | -0.470477 | -0.524226 |
| C  | -1.229603 | -1.754457 | -0.089927 |
| C  | 1.456293  | -1.670282 | -1.446057 |
| O  | 1.907671  | -2.754292 | -1.556448 |
| C  | 2.291405  | 0.509332  | -2.165585 |
| O  | 3.274919  | 0.861126  | -2.710054 |
| C  | -0.573792 | -2.082832 | 1.234258  |
| C  | 0.356124  | -3.114794 | 1.369869  |
| C  | 0.950925  | -3.385781 | 2.603112  |
| C  | 0.616102  | -2.626622 | 3.721213  |
| C  | -0.307955 | -1.587806 | 3.596237  |
| C  | -0.889991 | -1.317966 | 2.363763  |

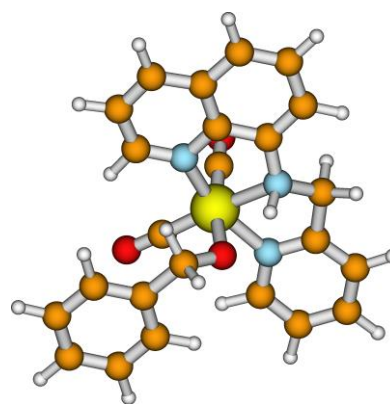

|   |           |           |           |
|---|-----------|-----------|-----------|
| H | -1.507222 | 4.334213  | 2.439865  |
| H | -1.588005 | 3.785278  | 0.019772  |
| H | 0.069301  | 3.155212  | 3.938147  |
| H | 2.790137  | -1.055375 | 0.824151  |
| H | 3.183381  | -0.465660 | 3.208078  |
| H | 1.860731  | 1.394797  | 4.240155  |
| H | 0.522647  | 2.564116  | -1.699325 |
| H | -2.086398 | 1.380906  | -1.263075 |
| H | -1.720183 | 2.799016  | -2.273616 |
| H | -2.818822 | 1.799369  | -4.270030 |
| H | -2.625652 | 0.156690  | -6.149610 |
| H | -0.868652 | -1.635759 | -5.990057 |
| H | 0.602123  | -1.687198 | -3.981761 |
| H | -2.324258 | -1.887374 | 0.040908  |
| H | -0.926192 | -2.532213 | -0.825255 |
| H | 0.620993  | -3.703487 | 0.493978  |
| H | 1.676519  | -4.190902 | 2.690831  |
| H | 1.076008  | -2.835131 | 4.683827  |
| H | -0.569107 | -0.985510 | 4.463812  |
| H | -1.599176 | -0.497581 | 2.256884  |

#### 4. Mn-1d

Final Gibbs free energy = -1419.31533916 Eh

Total Energy = -1419.65525932 Eh

|    |           |           |           |
|----|-----------|-----------|-----------|
| C  | -0.802192 | 3.670522  | 2.030198  |
| C  | -0.852371 | 3.313116  | 0.668279  |
| C  | -0.108290 | 2.253403  | 0.206980  |
| C  | 0.734668  | 1.535282  | 1.085234  |
| C  | 0.810213  | 1.912672  | 2.455259  |
| C  | 0.009589  | 2.988440  | 2.906179  |
| N  | 1.466949  | 0.487311  | 0.574397  |
| C  | 2.274465  | -0.174013 | 1.403181  |
| C  | 2.424097  | 0.154770  | 2.757335  |
| C  | 1.690553  | 1.188424  | 3.289618  |
| N  | -0.094534 | 1.821317  | -1.175227 |
| C  | -1.426456 | 1.553035  | -1.781452 |
| C  | -1.251981 | 0.676890  | -2.978476 |
| C  | -2.162778 | 0.653484  | -4.028805 |
| C  | -1.980116 | -0.240325 | -5.076472 |
| C  | -0.872584 | -1.082847 | -5.051435 |
| C  | 0.004621  | -1.000677 | -3.983243 |
| N  | -0.169965 | -0.145433 | -2.956923 |
| Mn | 1.003740  | 0.021262  | -1.313598 |
| O  | -2.050560 | 0.108005  | 0.681279  |
| C  | -1.413628 | -0.951015 | 0.294035  |
| C  | 1.729232  | -1.566112 | -1.363816 |
| O  | 2.225083  | -2.632738 | -1.413189 |

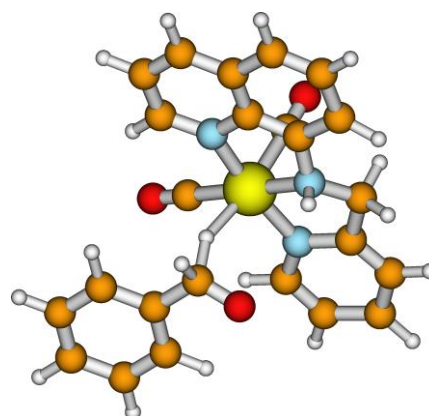

|   |           |           |           |
|---|-----------|-----------|-----------|
| C | 2.406231  | 0.684593  | -2.116941 |
| O | 3.362696  | 1.109671  | -2.652820 |
| C | -0.738855 | -1.789514 | 1.366097  |
| C | -0.055573 | -2.967482 | 1.054585  |
| C | 0.563821  | -3.712891 | 2.052687  |
| C | 0.494388  | -3.291069 | 3.381883  |
| C | -0.199085 | -2.125272 | 3.700108  |
| C | -0.811655 | -1.379146 | 2.695209  |
| H | -1.408375 | 4.499136  | 2.381993  |
| H | -1.494168 | 3.863253  | -0.013699 |
| H | 0.053417  | 3.268444  | 3.954954  |
| H | 2.820192  | -1.004953 | 0.966424  |
| H | 3.098342  | -0.434505 | 3.368600  |
| H | 1.769076  | 1.454478  | 4.340043  |
| H | 0.373251  | 2.535122  | -1.729715 |
| H | -2.008695 | 1.033453  | -0.992217 |
| H | -1.953426 | 2.477249  | -2.044663 |
| H | -3.012056 | 1.329145  | -4.010578 |
| H | -2.685323 | -0.274900 | -5.900587 |
| H | -0.686246 | -1.797627 | -5.844538 |
| H | 0.885914  | -1.631558 | -3.925512 |
| H | -1.943191 | -1.637696 | -0.425286 |
| H | -0.480528 | -0.706280 | -0.456866 |
| H | -0.005631 | -3.297509 | 0.017887  |
| H | 1.102626  | -4.621419 | 1.795835  |
| H | 0.977905  | -3.870624 | 4.163980  |
| H | -0.257093 | -1.795037 | 4.734942  |
| H | -1.355713 | -0.461831 | 2.908855  |

## 5. Benzyl alcohol (BA)

Final Gibbs free energy = -346.63702690 Eh

Total Energy = -346.73975707 Eh

|   |           |           |           |
|---|-----------|-----------|-----------|
| C | -2.353972 | 3.352255  | 0.058449  |
| C | -3.590684 | 2.744165  | -0.175551 |
| C | -1.228646 | 2.545434  | 0.232339  |
| C | -1.337539 | 1.157814  | 0.176391  |
| C | -3.703377 | 1.358587  | -0.224153 |
| C | -2.574744 | 0.559624  | -0.049197 |
| C | -2.254872 | 4.853246  | 0.143403  |
| O | -0.955129 | 5.365019  | -0.069317 |
| H | -2.536618 | 5.186268  | 1.149949  |
| H | -4.471656 | 3.366223  | -0.325113 |
| H | -0.265134 | 3.016079  | 0.407684  |
| H | -4.672142 | 0.901254  | -0.405801 |
| H | -0.452349 | 0.541570  | 0.309467  |
| H | -2.659006 | -0.522405 | -0.094390 |
| H | -0.691345 | 5.106116  | -0.959325 |

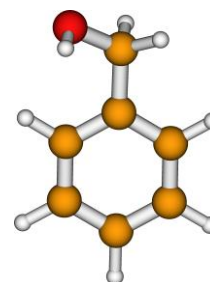



H -2.989527 5.305551 -0.542723

## 7. Benzaldehyde (BD)

Final Gibbs free energy = -345.46160406 Eh

Total Energy = -345.53824234 Eh

|   |           |           |           |
|---|-----------|-----------|-----------|
| C | -1.661743 | 2.833383  | 0.000007  |
| C | -2.752098 | 1.976599  | -0.000001 |
| C | -0.362814 | 2.308293  | 0.000012  |
| C | -0.168732 | 0.923125  | 0.000007  |
| C | -2.552014 | 0.593679  | -0.000005 |
| C | -1.262422 | 0.064964  | -0.000000 |
| C | 0.803829  | 3.200306  | 0.000023  |
| H | 1.784345  | 2.665642  | -0.000024 |
| O | 0.751888  | 4.417369  | -0.000023 |
| H | -1.785468 | 3.912731  | 0.000011  |
| H | 0.846631  | 0.531044  | 0.000011  |
| H | -1.113927 | -1.010531 | -0.000003 |
| H | -3.409650 | -0.072942 | -0.000011 |
| H | -3.761625 | 2.376539  | -0.000004 |

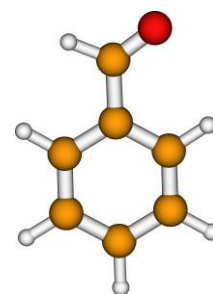

## 6. TS1

Final Gibbs free energy = -1073.85501577 Eh

Total Energy = -1074.08345283 Eh

Imaginary frequency = -1409.70 cm<sup>-1</sup>

|    |           |           |           |
|----|-----------|-----------|-----------|
| C  | -3.914014 | -0.167232 | 1.096334  |
| C  | -2.979518 | 0.030590  | 0.063726  |
| C  | -1.629386 | -0.193417 | 0.298604  |
| C  | -1.204410 | -0.573875 | 1.607484  |
| C  | -2.158207 | -0.804151 | 2.634224  |
| C  | -3.528592 | -0.593727 | 2.349780  |
| N  | 0.152898  | -0.673914 | 1.819422  |
| C  | 0.571178  | -1.051450 | 3.026777  |
| C  | -0.307570 | -1.336055 | 4.083038  |
| C  | -1.664485 | -1.206412 | 3.896984  |
| N  | -0.609282 | -0.106631 | -0.619848 |
| C  | -0.731205 | 0.559101  | -1.890254 |
| C  | 0.641587  | 0.689032  | -2.498677 |
| C  | 0.810609  | 1.060264  | -3.827701 |
| C  | 2.090814  | 1.203629  | -4.347784 |
| C  | 3.177124  | 0.958675  | -3.512979 |
| C  | 2.941329  | 0.580849  | -2.201768 |
| N  | 1.701989  | 0.447740  | -1.685510 |
| Mn | 1.288689  | -0.095584 | 0.235745  |
| H  | 1.018098  | -1.712717 | -0.431497 |

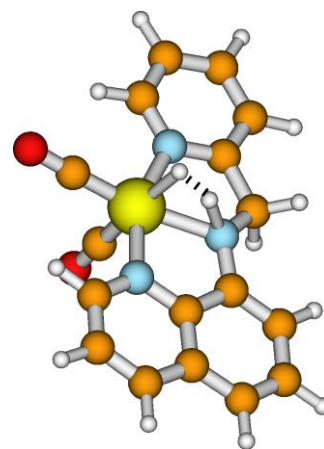

|   |           |           |           |
|---|-----------|-----------|-----------|
| C | 2.882778  | -0.504081 | 0.825704  |
| O | 3.954805  | -0.804543 | 1.210899  |
| H | -4.965883 | 0.011356  | 0.890214  |
| H | -3.311491 | 0.344891  | -0.921761 |
| H | -4.260390 | -0.755888 | 3.135798  |
| H | 1.646986  | -1.118094 | 3.158396  |
| H | 0.102396  | -1.641986 | 5.039563  |
| H | -2.363817 | -1.400769 | 4.706014  |
| H | 0.098954  | -1.125301 | -0.646062 |
| H | -1.166561 | 1.563280  | -1.752060 |
| H | -1.397783 | 0.031731  | -2.591867 |
| H | -0.067538 | 1.233926  | -4.442695 |
| H | 2.237146  | 1.497067  | -5.382490 |
| H | 4.197644  | 1.051532  | -3.867579 |
| H | 3.756993  | 0.371993  | -1.516628 |
| C | 1.439084  | 1.566335  | 0.829327  |
| O | 1.549034  | 2.663838  | 1.229126  |

## 7. TS2

Final Gibbs free energy = -1419.33428688 Eh

Total Energy = -1419.67251939 Eh

Imaginary frequency = -1374.68 cm<sup>-1</sup>

|    |           |           |           |
|----|-----------|-----------|-----------|
| C  | 0.332641  | -2.461258 | 2.854922  |
| C  | -0.747922 | -2.877195 | 2.068976  |
| C  | -0.794521 | -4.203718 | 1.638325  |
| C  | 0.212002  | -5.102246 | 1.990064  |
| C  | 1.281310  | -4.679354 | 2.775038  |
| C  | 1.339452  | -3.353432 | 3.205748  |
| C  | -1.817965 | -1.890541 | 1.687039  |
| O  | -1.251662 | -0.678351 | 1.258923  |
| Mn | -0.104516 | -0.630188 | -0.489488 |
| C  | 1.270890  | -1.695317 | -0.337014 |
| O  | 2.238334  | -2.364721 | -0.253881 |
| N  | 0.871691  | 0.934462  | 0.501432  |
| C  | 0.149603  | 2.096511  | 0.568887  |
| C  | 0.653835  | 3.271020  | 1.195540  |
| C  | 1.919804  | 3.182503  | 1.817408  |
| C  | 2.613822  | 1.995697  | 1.773325  |
| C  | 2.060349  | 0.897683  | 1.093036  |
| C  | -0.117315 | 4.454360  | 1.144076  |
| C  | -1.332092 | 4.453682  | 0.493694  |
| C  | -1.844045 | 3.280728  | -0.092960 |
| C  | -1.131637 | 2.094205  | -0.043714 |
| N  | -1.600904 | 0.856394  | -0.533250 |
| C  | -2.053878 | 0.857585  | -1.917683 |
| C  | -0.832708 | 0.869865  | -2.806329 |
| C  | -0.778906 | 1.497557  | -4.042493 |

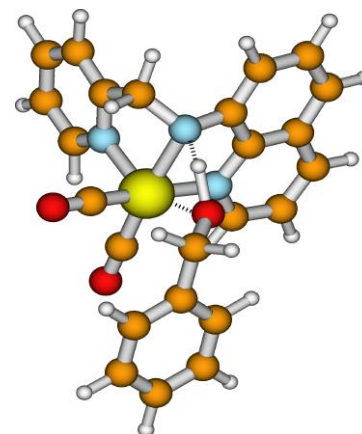

|   |           |           |           |
|---|-----------|-----------|-----------|
| C | 0.393776  | 1.446336  | -4.791556 |
| C | 1.488929  | 0.766752  | -4.268434 |
| C | 1.374581  | 0.166423  | -3.023056 |
| N | 0.242122  | 0.205800  | -2.296579 |
| C | -0.996448 | -1.955401 | -1.235369 |
| O | -1.558942 | -2.860287 | -1.731682 |
| H | -1.919786 | 5.366059  | 0.445868  |
| H | -2.821024 | 3.299562  | -0.568761 |
| H | 0.266998  | 5.355982  | 1.613007  |
| H | 2.602324  | -0.042340 | 1.024085  |
| H | 3.585960  | 1.891768  | 2.242756  |
| H | 2.330168  | 4.055152  | 2.319391  |
| H | -2.632301 | -0.057703 | -2.096657 |
| H | -2.711385 | 1.701646  | -2.168306 |
| H | -1.655614 | 2.025114  | -4.406420 |
| H | 0.451587  | 1.931523  | -5.760954 |
| H | 2.426065  | 0.701426  | -4.810400 |
| H | 2.201515  | -0.377394 | -2.574938 |
| H | -2.464191 | -1.690823 | 2.559703  |
| H | -2.467092 | -2.343243 | 0.916551  |
| H | -1.620472 | -4.528480 | 1.007375  |
| H | 0.165582  | -6.130597 | 1.641080  |
| H | 2.070680  | -5.376090 | 3.044039  |
| H | 2.175894  | -3.015649 | 3.812772  |
| H | 0.381104  | -1.421375 | 3.171369  |
| H | -1.845691 | 0.079909  | 0.385492  |

## 8. TS3

Final Gibbs free energy = -1419.30159934 Eh

Total Energy = -1419.64204846 Eh

Imaginary frequency = -368.77 cm<sup>-1</sup>

|   |           |           |           |
|---|-----------|-----------|-----------|
| C | -0.767320 | 3.950865  | 1.929137  |
| C | -0.868211 | 3.485573  | 0.600816  |
| C | -0.157675 | 2.379644  | 0.198110  |
| C | 0.679907  | 1.699907  | 1.111662  |
| C | 0.803995  | 2.180878  | 2.442553  |
| C | 0.056870  | 3.319326  | 2.830000  |
| N | 1.355013  | 0.584155  | 0.676450  |
| C | 2.142372  | -0.052615 | 1.537347  |
| C | 2.333112  | 0.369845  | 2.862324  |
| C | 1.664665  | 1.480852  | 3.317601  |
| N | -0.161373 | 1.880063  | -1.158146 |
| C | -1.488966 | 1.611040  | -1.768566 |
| C | -1.285580 | 0.752604  | -2.968074 |
| C | -2.125865 | 0.781453  | -4.077405 |
| C | -1.916688 | -0.111563 | -5.119909 |
| C | -0.857426 | -1.012325 | -5.031584 |

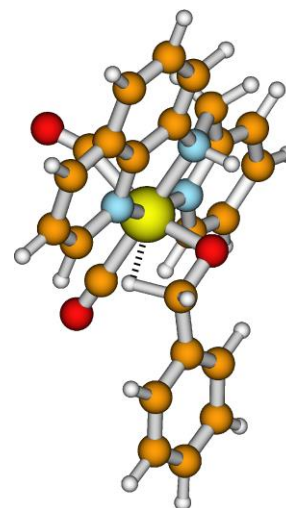

|    |           |           |           |
|----|-----------|-----------|-----------|
| C  | -0.051187 | -0.983675 | -3.906056 |
| N  | -0.251354 | -0.125963 | -2.886761 |
| Mn | 0.858738  | 0.021790  | -1.182358 |
| O  | -1.512600 | 0.010477  | 0.489132  |
| C  | -1.297430 | -1.274867 | 0.182823  |
| C  | 1.664722  | -1.540945 | -1.205519 |
| O  | 2.250954  | -2.557005 | -1.249666 |
| C  | 2.255164  | 0.680734  | -1.952100 |
| O  | 3.209997  | 1.115841  | -2.482279 |
| C  | -0.643618 | -2.105273 | 1.279675  |
| C  | -0.111842 | -3.373220 | 1.025755  |
| C  | 0.494799  | -4.108934 | 2.039453  |
| C  | 0.568786  | -3.587108 | 3.332732  |
| C  | 0.033868  | -2.328017 | 3.596150  |
| C  | -0.563073 | -1.592233 | 2.573513  |
| H  | -1.341410 | 4.821087  | 2.231911  |
| H  | -1.514095 | 3.999082  | -0.106160 |
| H  | 0.146339  | 3.679636  | 3.851269  |
| H  | 2.635063  | -0.946421 | 1.163762  |
| H  | 2.988159  | -0.204017 | 3.508194  |
| H  | 1.780266  | 1.827622  | 4.341246  |
| H  | 0.331958  | 2.552126  | -1.744121 |
| H  | -2.009006 | 1.019068  | -0.979153 |
| H  | -2.037268 | 2.527456  | -2.014434 |
| H  | -2.936170 | 1.503153  | -4.109163 |
| H  | -2.565215 | -0.102183 | -5.990504 |
| H  | -0.652804 | -1.726994 | -5.820657 |
| H  | 0.789213  | -1.662142 | -3.792701 |
| H  | -2.211099 | -1.851630 | -0.142243 |
| H  | -0.640029 | -1.453163 | -0.737935 |
| H  | -0.162081 | -3.778516 | 0.014614  |
| H  | 0.915035  | -5.088627 | 1.823647  |
| H  | 1.043523  | -4.159297 | 4.125996  |
| H  | 0.093229  | -1.912443 | 4.600591  |
| H  | -0.966363 | -0.595103 | 2.739033  |

## 9. TS4

Final Gibbs free energy = -1419.31279770Eh  
Total Energy = -1419.65051153 Eh  
Imaginary frequency = -356.37 cm<sup>-1</sup>

|    |           |           |           |
|----|-----------|-----------|-----------|
| C  | -0.897012 | 3.612753  | 2.028134  |
| C  | -0.941142 | 3.249829  | 0.668435  |
| C  | -0.158221 | 2.216913  | 0.204792  |
| C  | 0.699588  | 1.518597  | 1.083253  |
| C  | 0.780008  | 1.912657  | 2.447517  |
| C  | -0.048278 | 2.966044  | 2.898000  |
| N  | 1.435416  | 0.469697  | 0.575182  |
| C  | 2.260021  | -0.166021 | 1.406212  |
| C  | 2.426252  | 0.189908  | 2.753359  |
| C  | 1.686337  | 1.220178  | 3.282529  |
| N  | -0.125135 | 1.793573  | -1.177140 |
| C  | -1.439802 | 1.511103  | -1.798941 |
| C  | -1.224757 | 0.679722  | -3.025402 |
| C  | -2.083262 | 0.718731  | -4.116443 |
| C  | -1.858606 | -0.126214 | -5.198074 |
| C  | -0.760127 | -0.979916 | -5.155434 |
| C  | 0.065689  | -0.957618 | -4.042878 |
| N  | -0.150261 | -0.150559 | -2.984800 |
| Mn | 0.969242  | -0.024548 | -1.302802 |
| O  | -2.231010 | 0.032524  | 0.844159  |
| C  | -1.662252 | -1.026483 | 0.516517  |
| C  | 1.644251  | -1.628866 | -1.313382 |
| O  | 2.087627  | -2.722381 | -1.313840 |
| C  | 2.411313  | 0.632276  | -2.089747 |
| O  | 3.391388  | 1.019582  | -2.614897 |
| C  | -0.835047 | -1.802301 | 1.488652  |
| C  | -0.225760 | -3.003843 | 1.117749  |
| C  | 0.525064  | -3.724573 | 2.038578  |
| C  | 0.659076  | -3.255595 | 3.347425  |
| C  | 0.041824  | -2.064864 | 3.725726  |
| C  | -0.699123 | -1.338621 | 2.797455  |
| H  | -1.530661 | 4.419107  | 2.384248  |
| H  | -1.600198 | 3.778269  | -0.014943 |
| H  | 0.000438  | 3.256242  | 3.944254  |
| H  | 2.807400  | -1.002064 | 0.980195  |
| H  | 3.121969  | -0.377600 | 3.362063  |
| H  | 1.775689  | 1.504210  | 4.327647  |
| H  | 0.343173  | 2.511933  | -1.725368 |
| H  | -2.024334 | 0.954822  | -1.052102 |
| H  | -1.993351 | 2.426910  | -2.041909 |
| H  | -2.922264 | 1.408067  | -4.106298 |
| H  | -2.522250 | -0.113008 | -6.056833 |
| H  | -0.536177 | -1.655920 | -5.973300 |
| H  | 0.938137  | -1.599794 | -3.970125 |
| H  | -2.057563 | -1.646797 | -0.320997 |
| H  | -0.421397 | -0.704279 | -0.535814 |

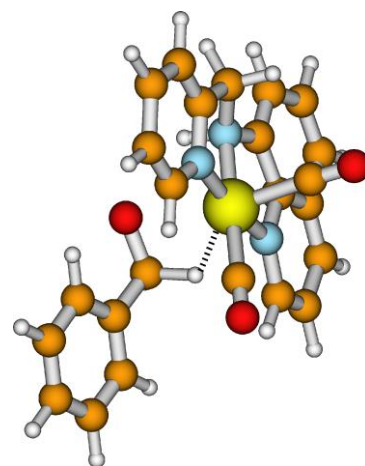

|   |           |           |          |
|---|-----------|-----------|----------|
| H | -0.327995 | -3.356217 | 0.092624 |
| H | 1.007216  | -4.651617 | 1.739410 |
| H | 1.242347  | -3.821074 | 4.069577 |
| H | 0.145046  | -1.698599 | 4.744633 |
| H | -1.188525 | -0.404275 | 3.063143 |

**$^1\text{H}$  and  $^{13}\text{C}$  and  $^{19}\text{F}$  NMR data of isolated products:**

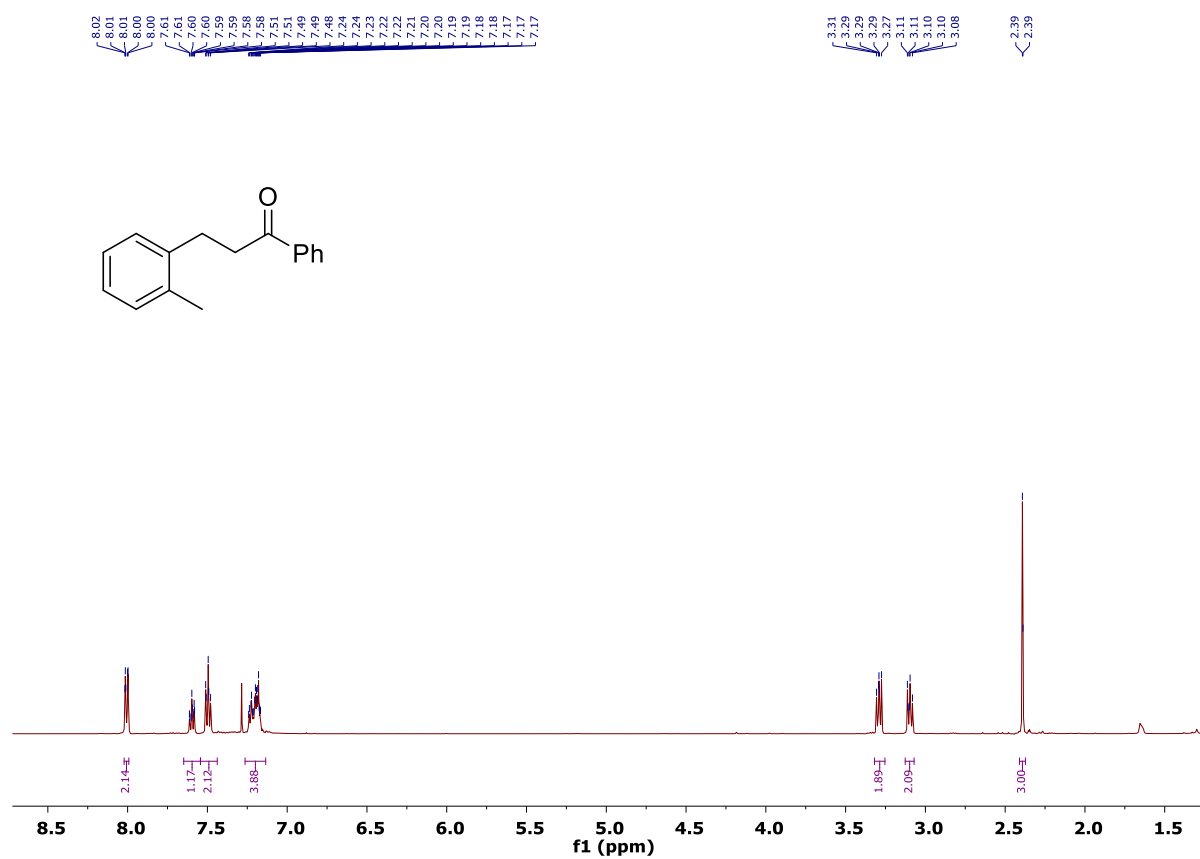

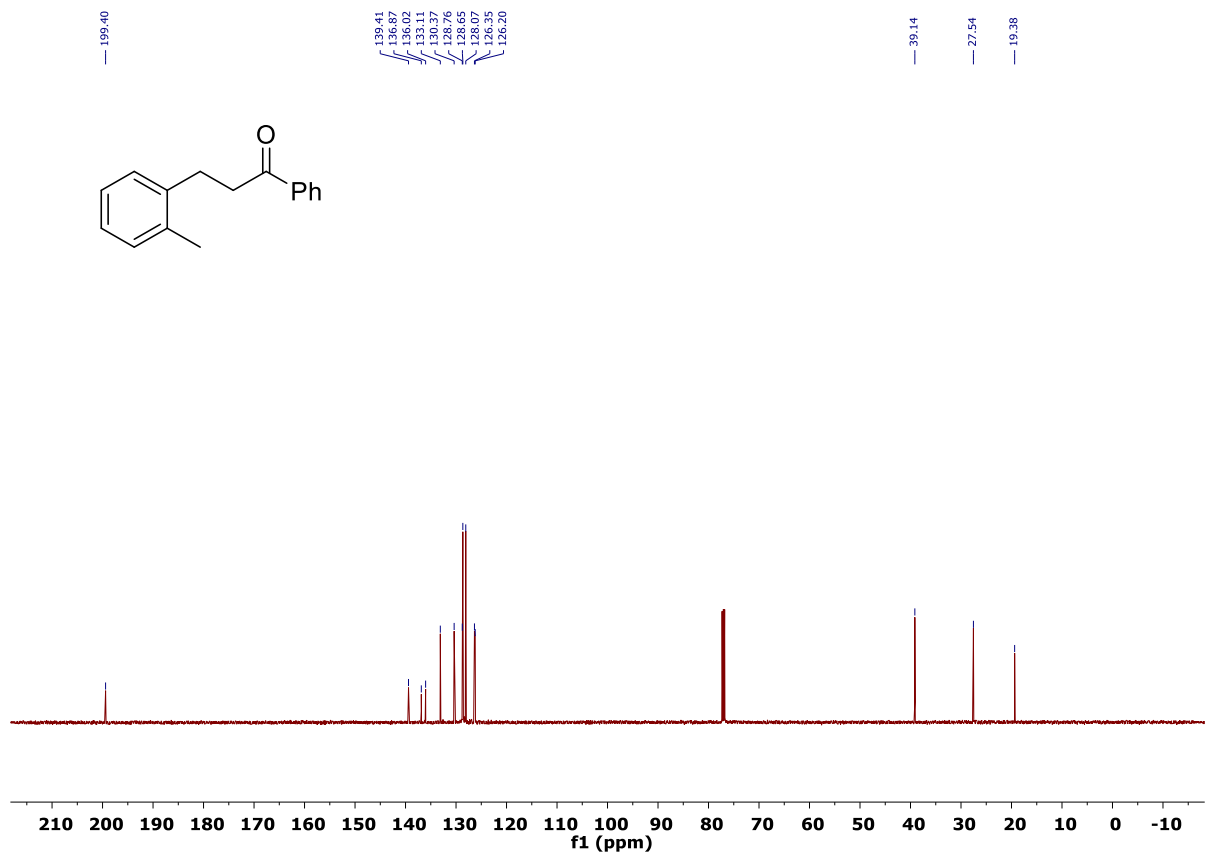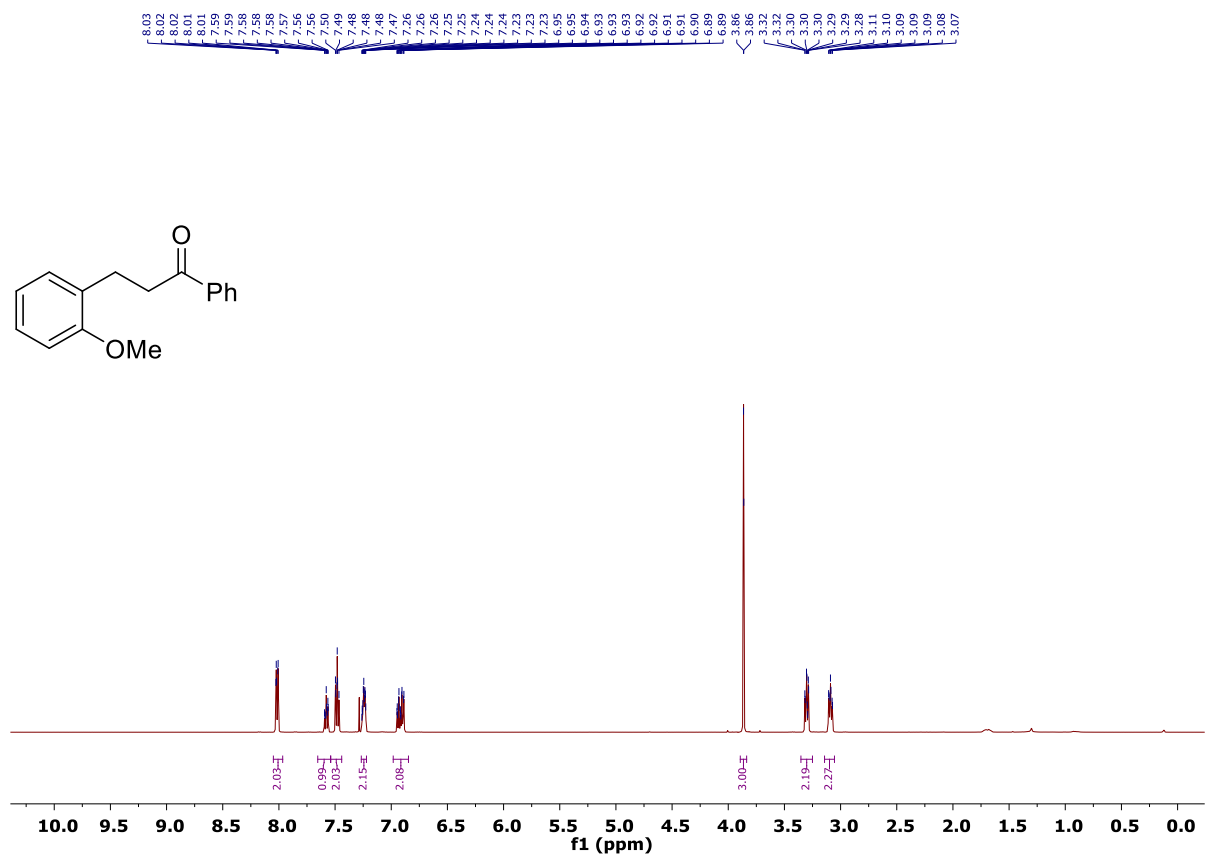

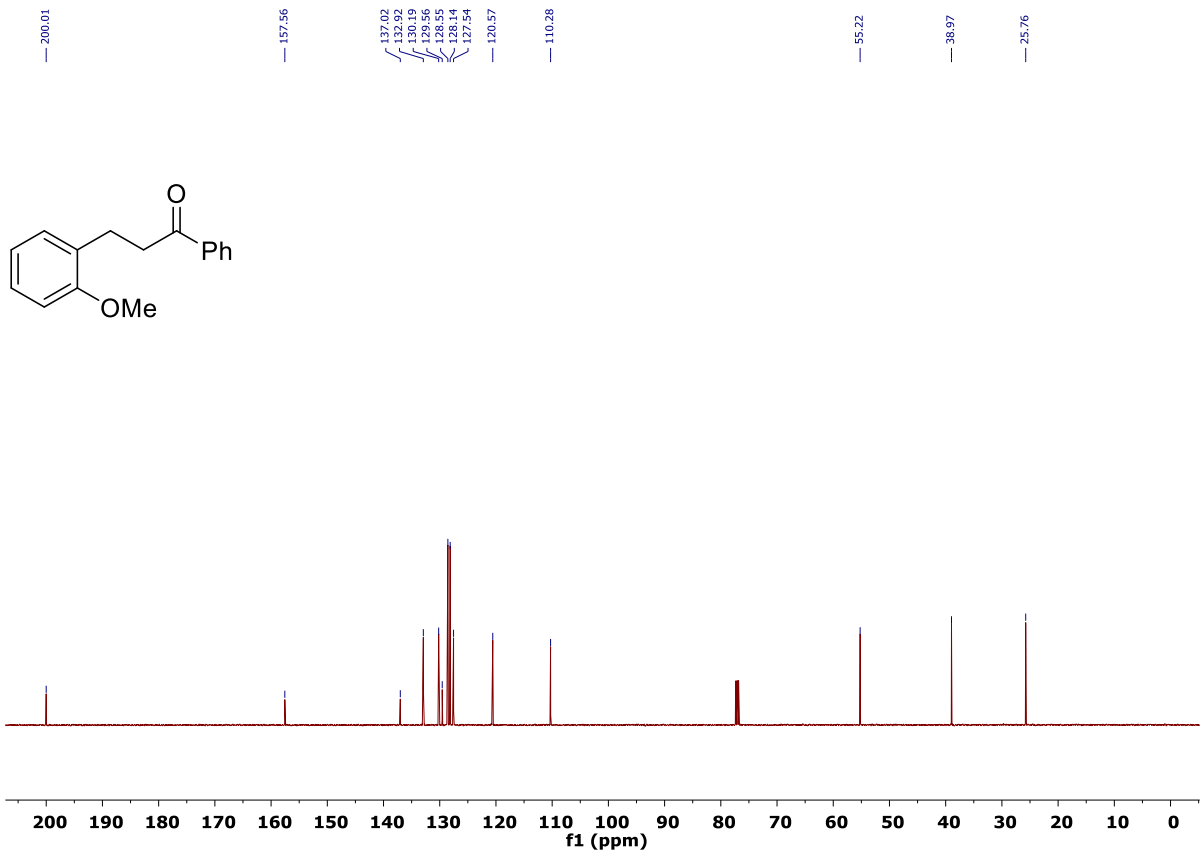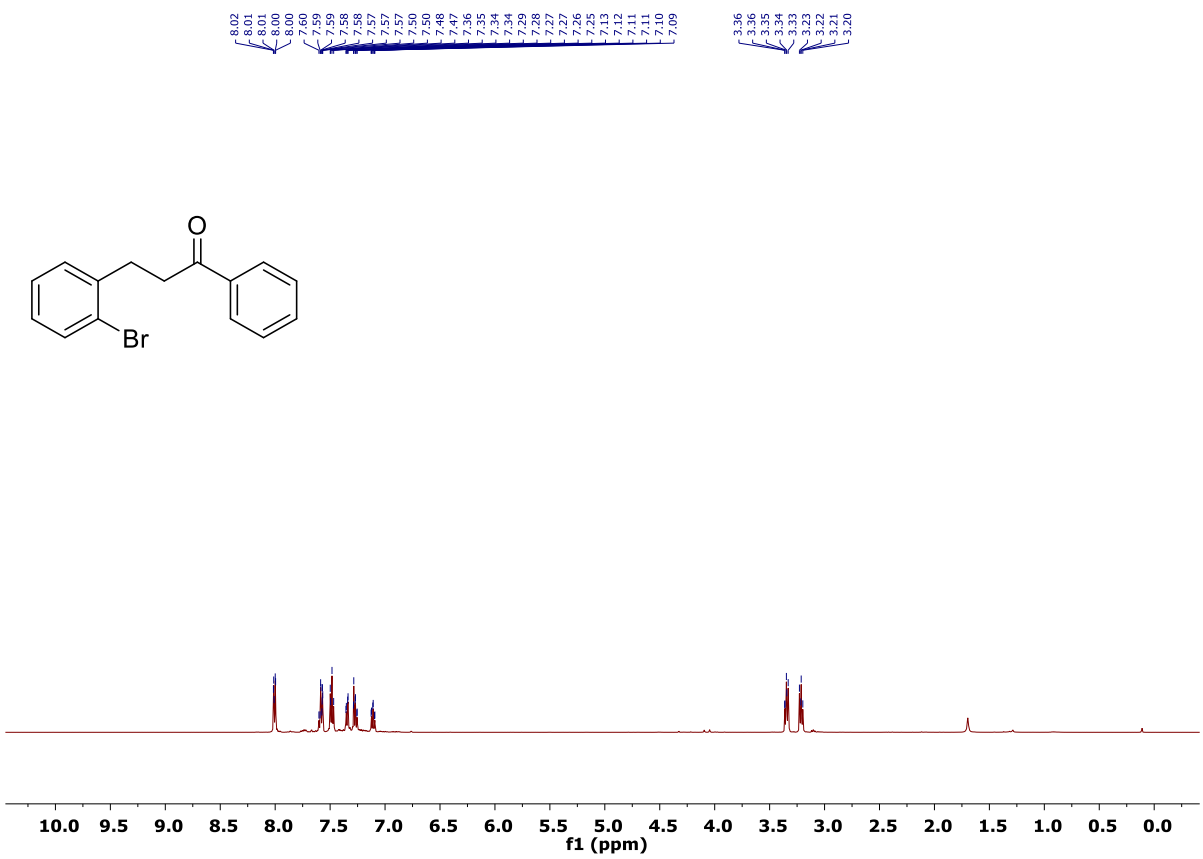



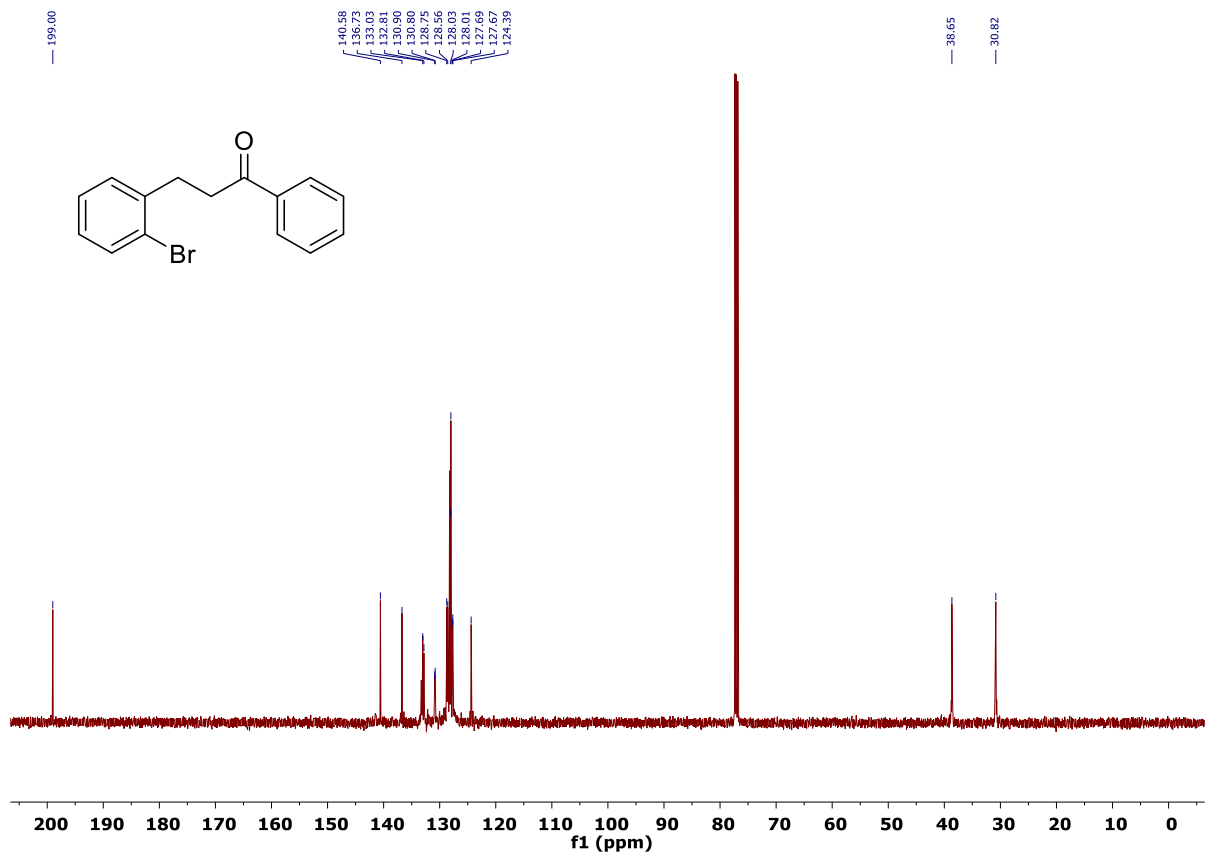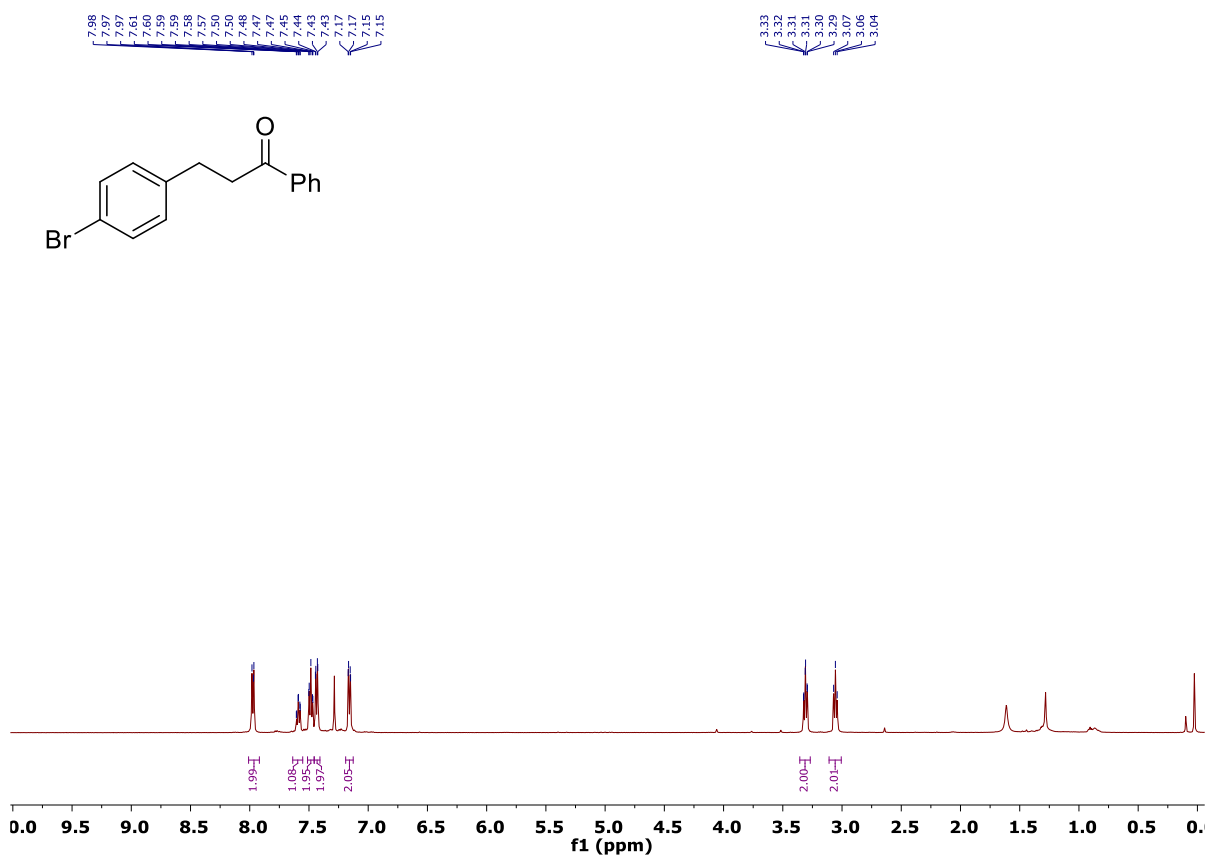

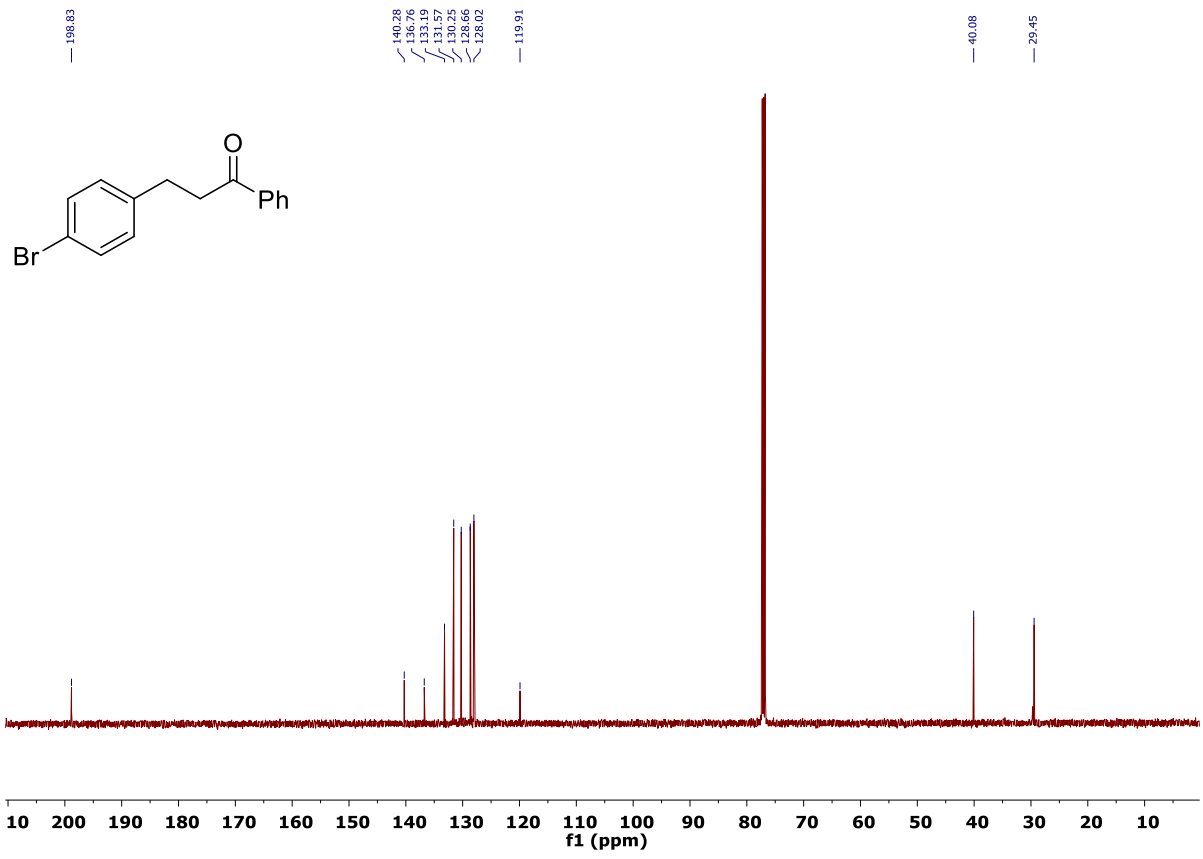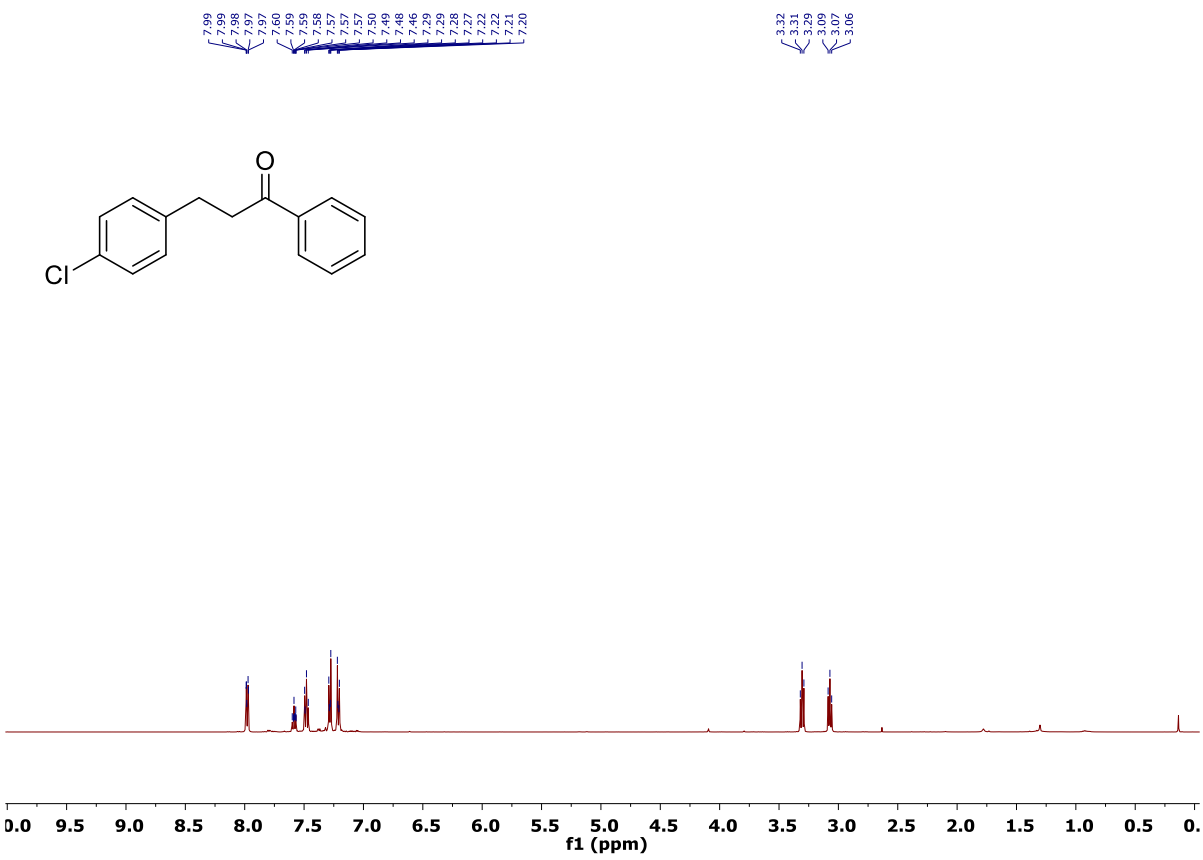

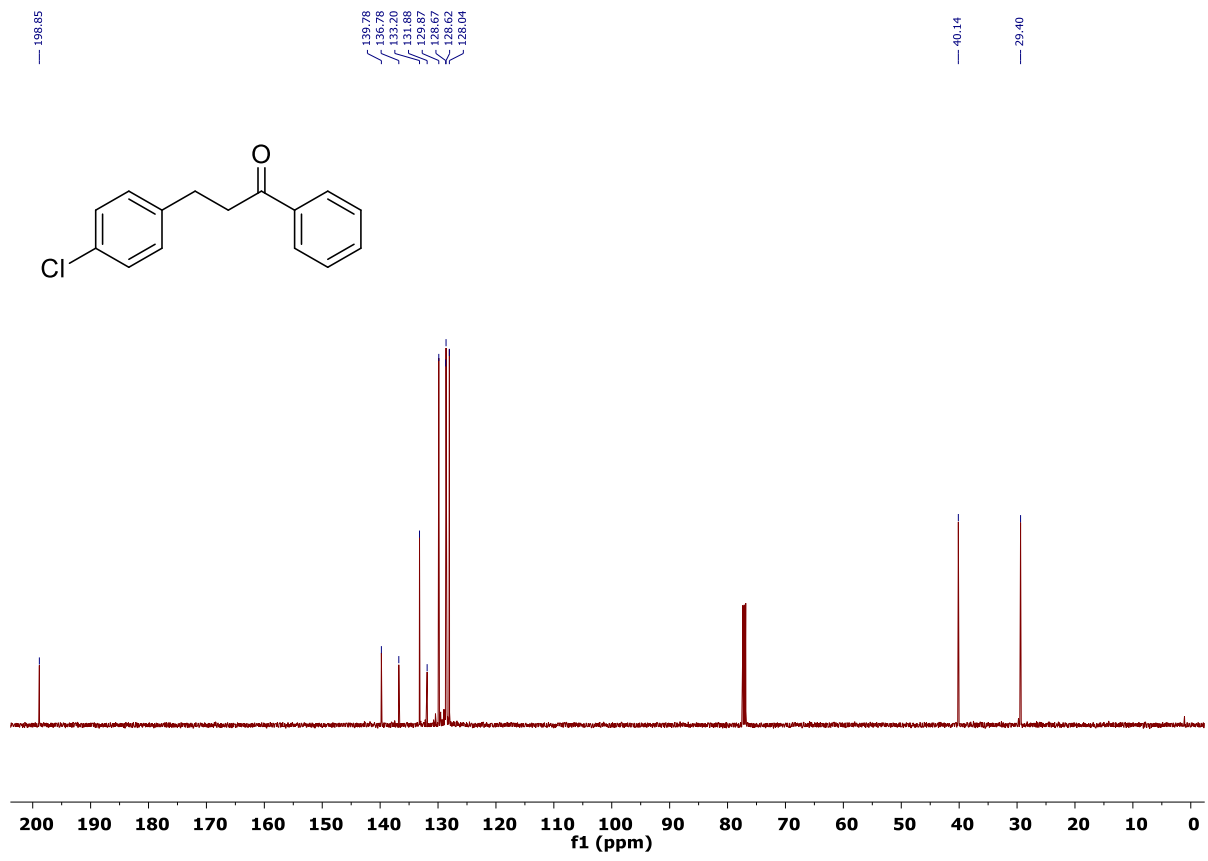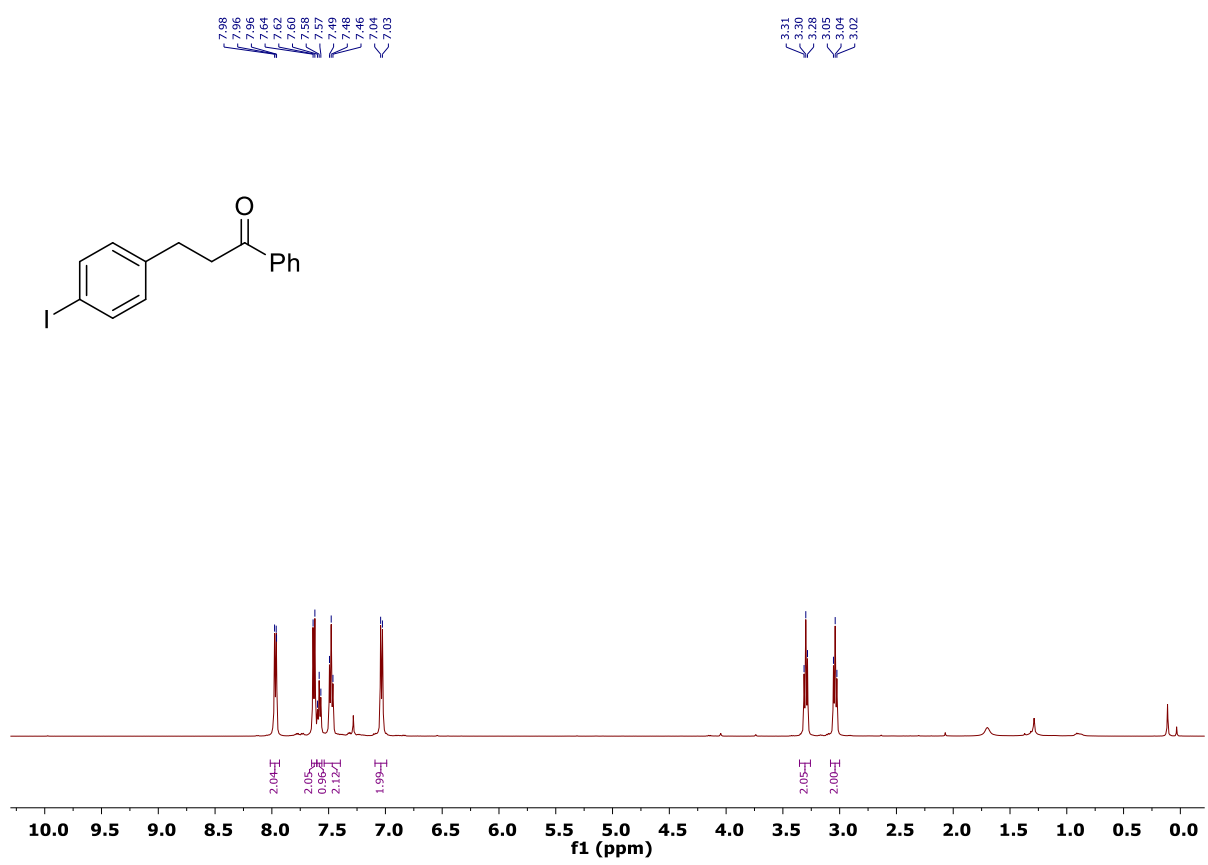

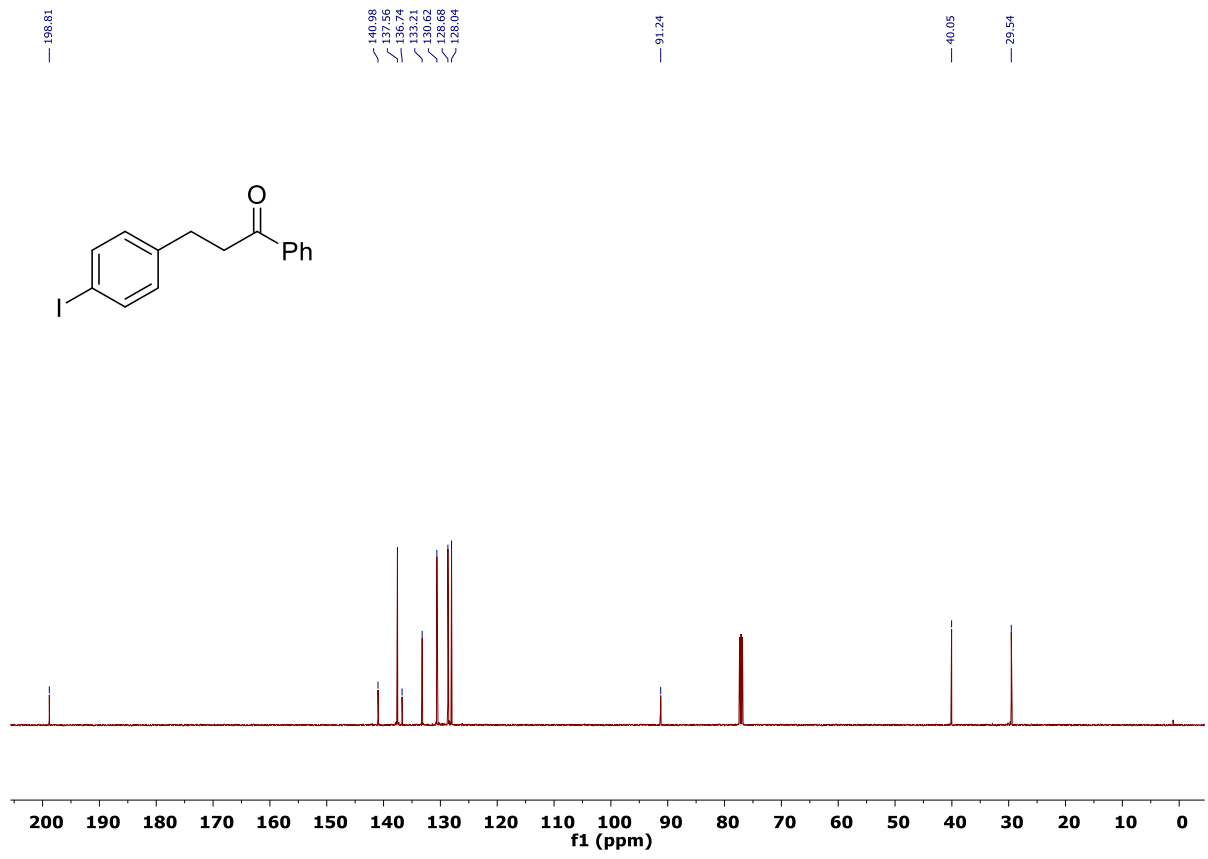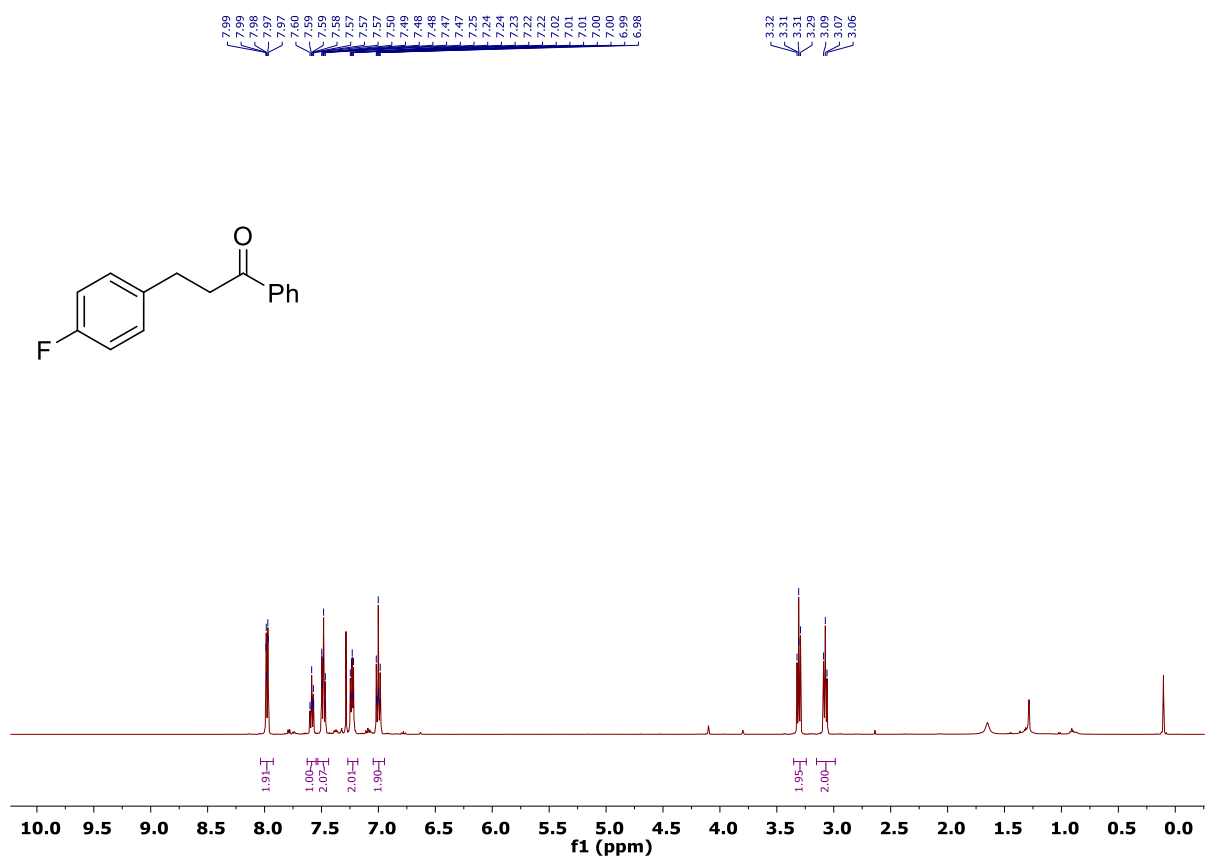

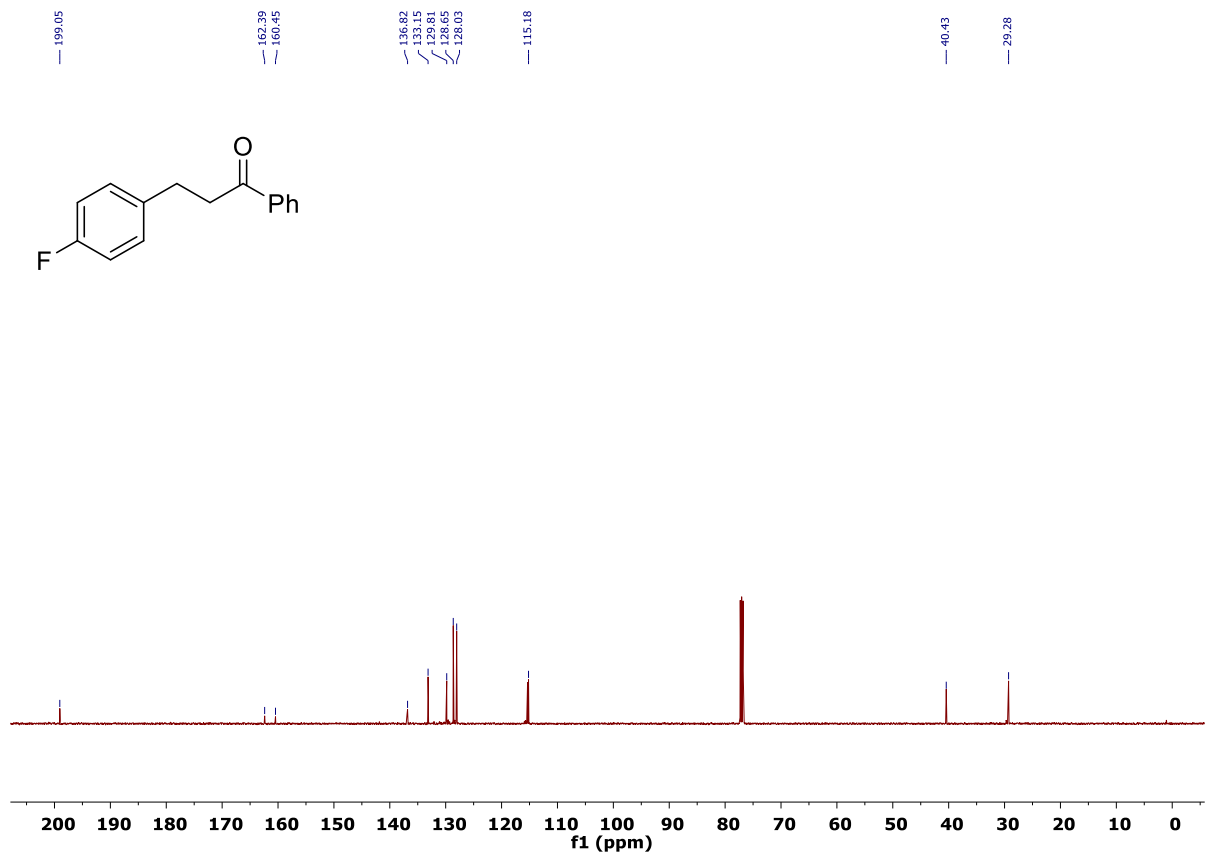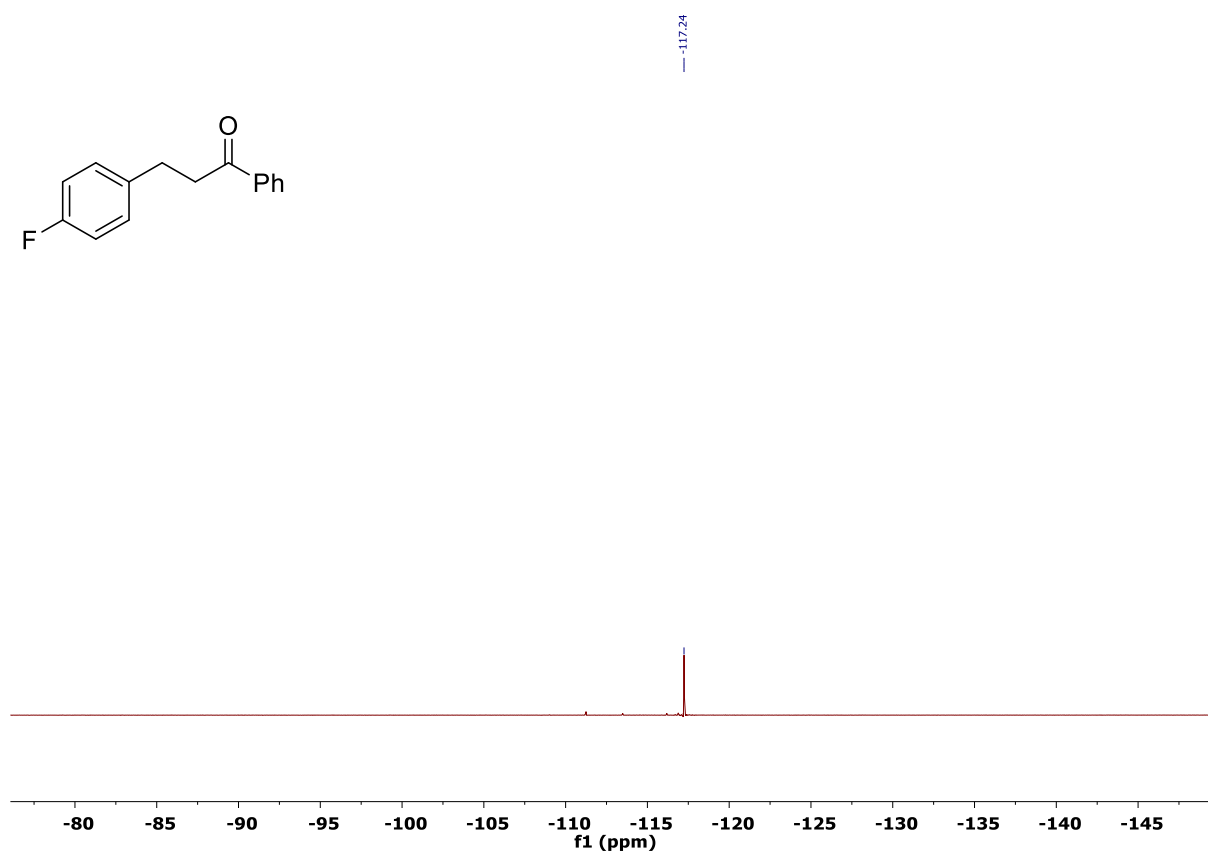

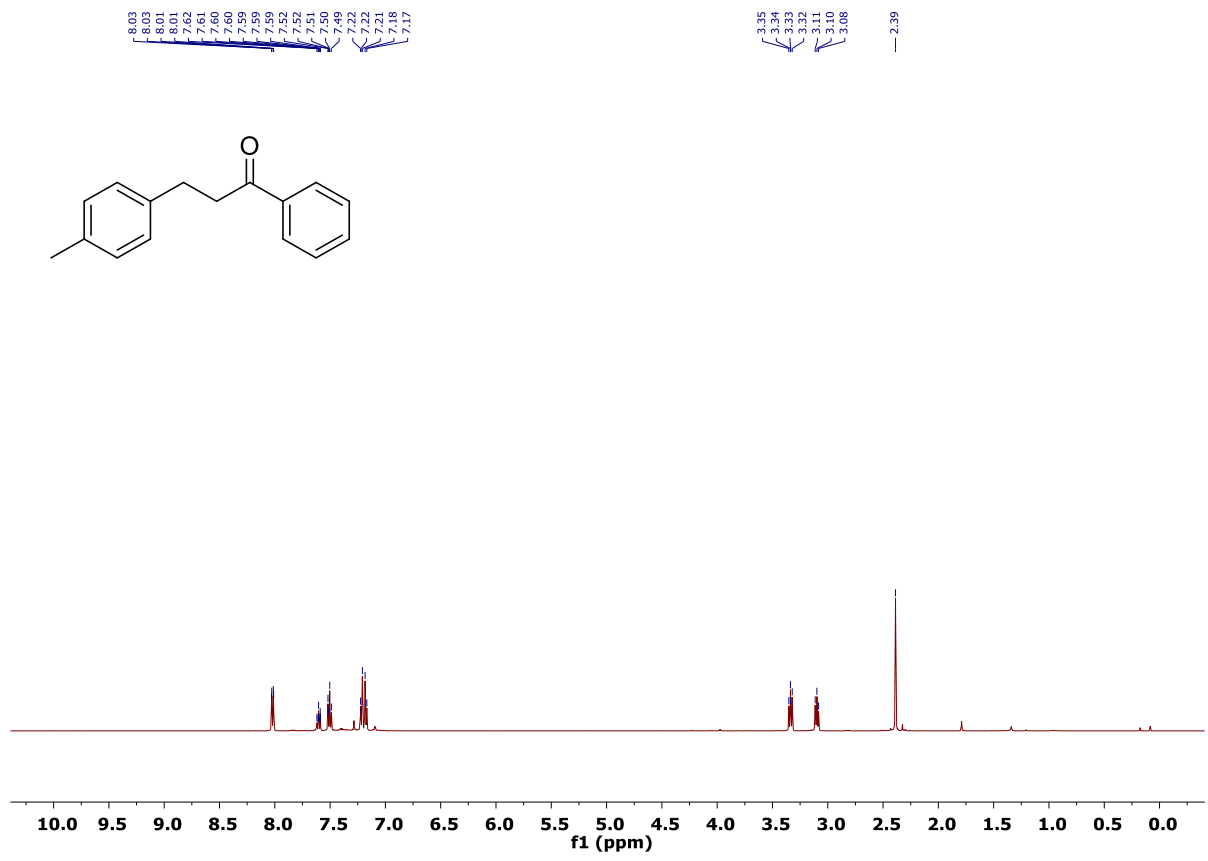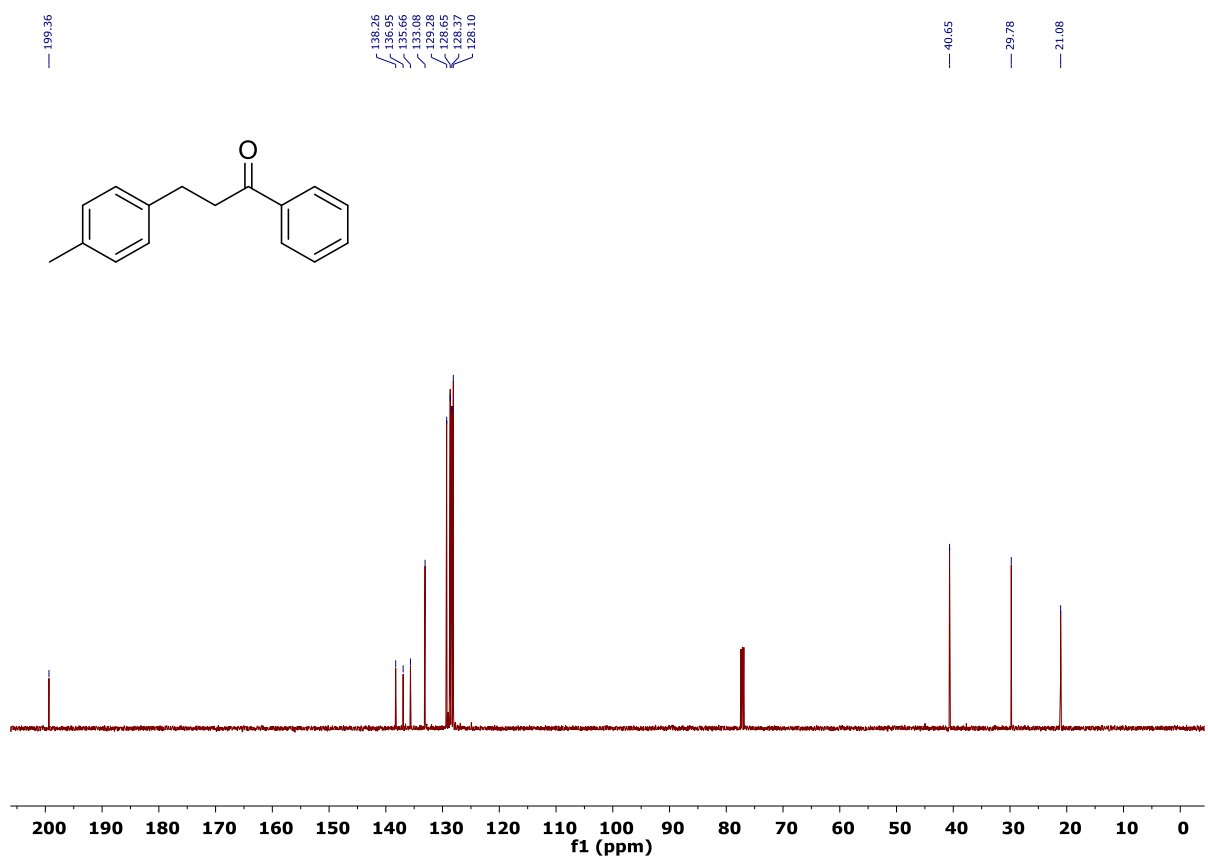



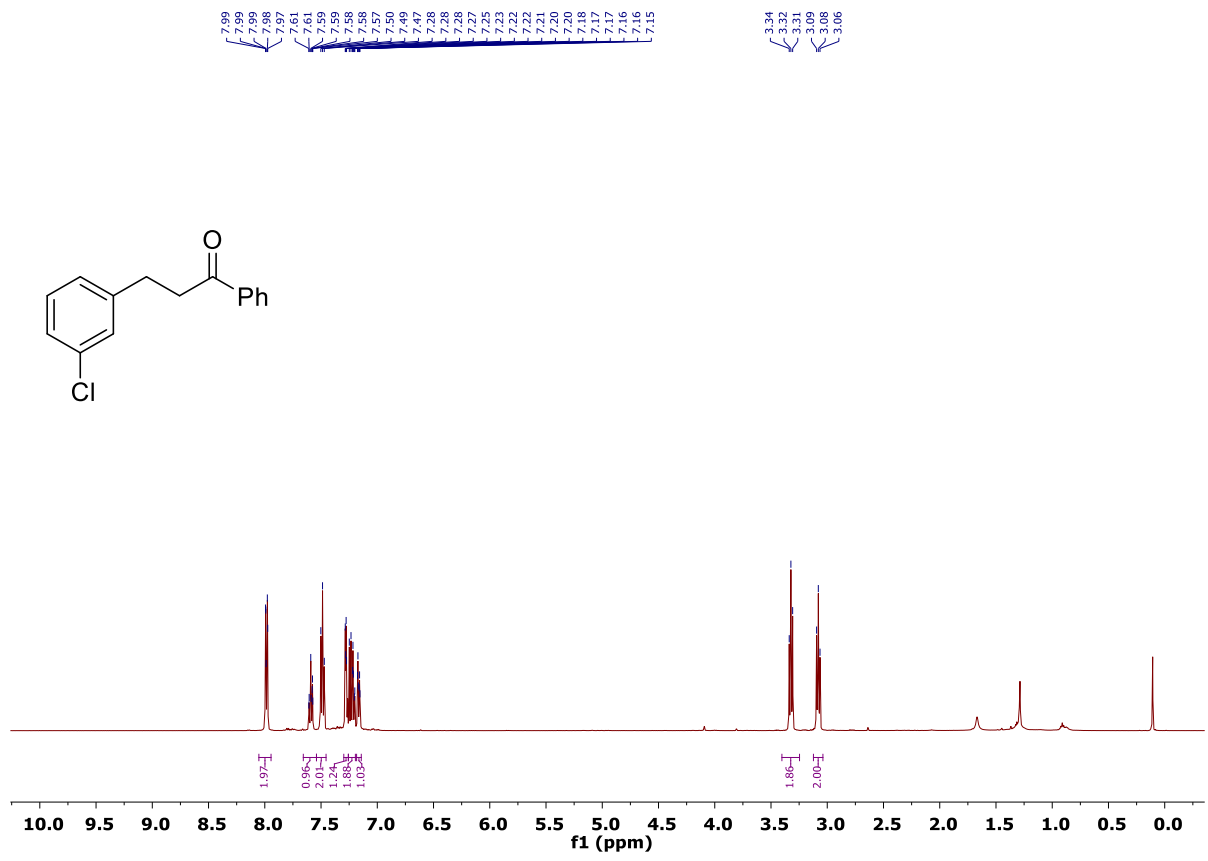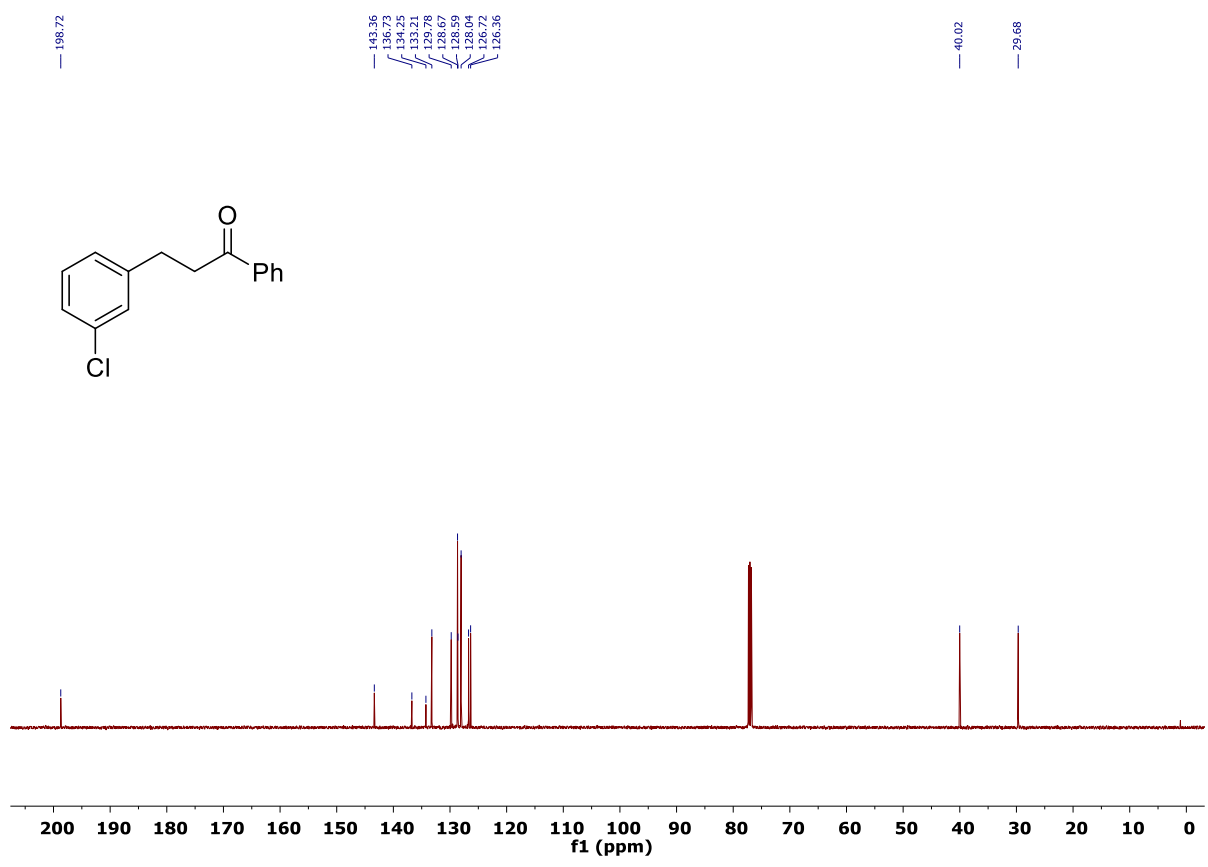



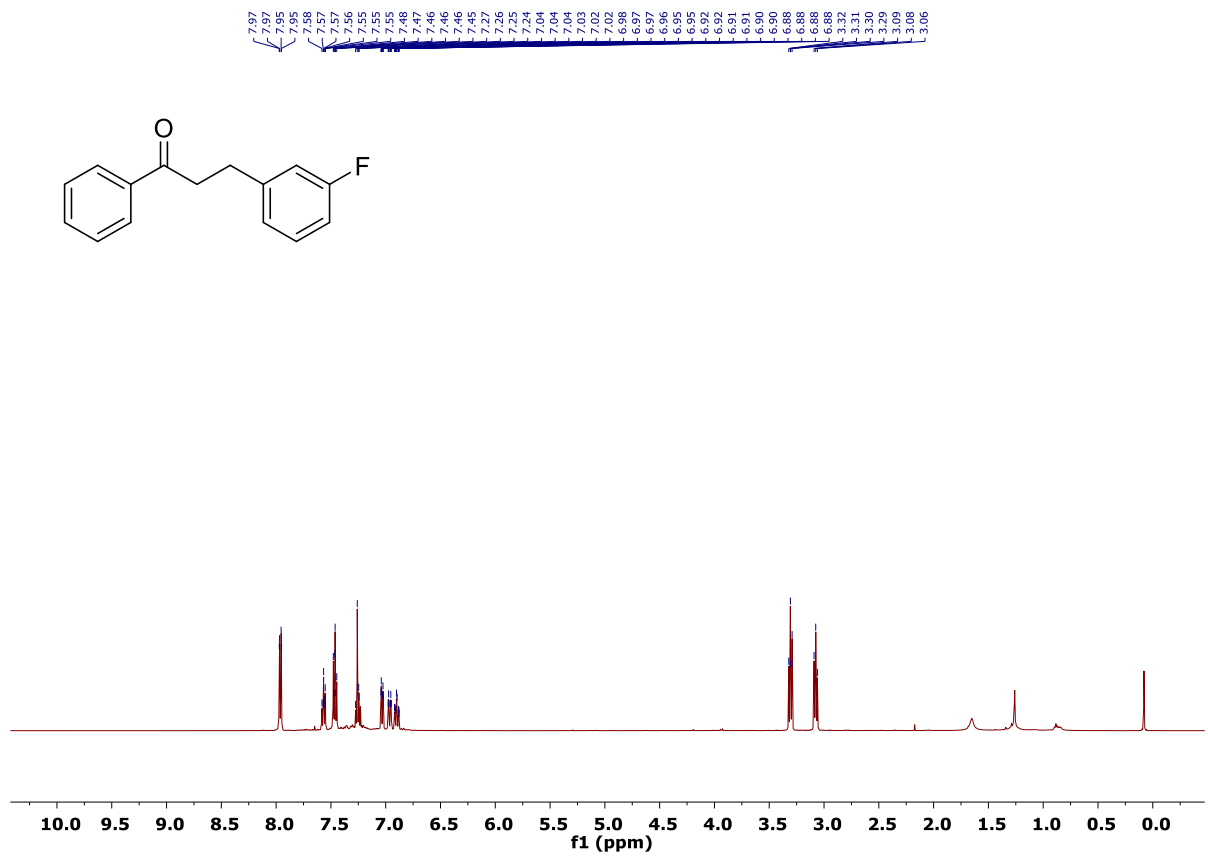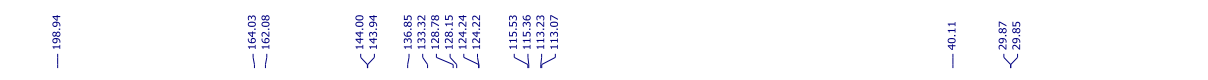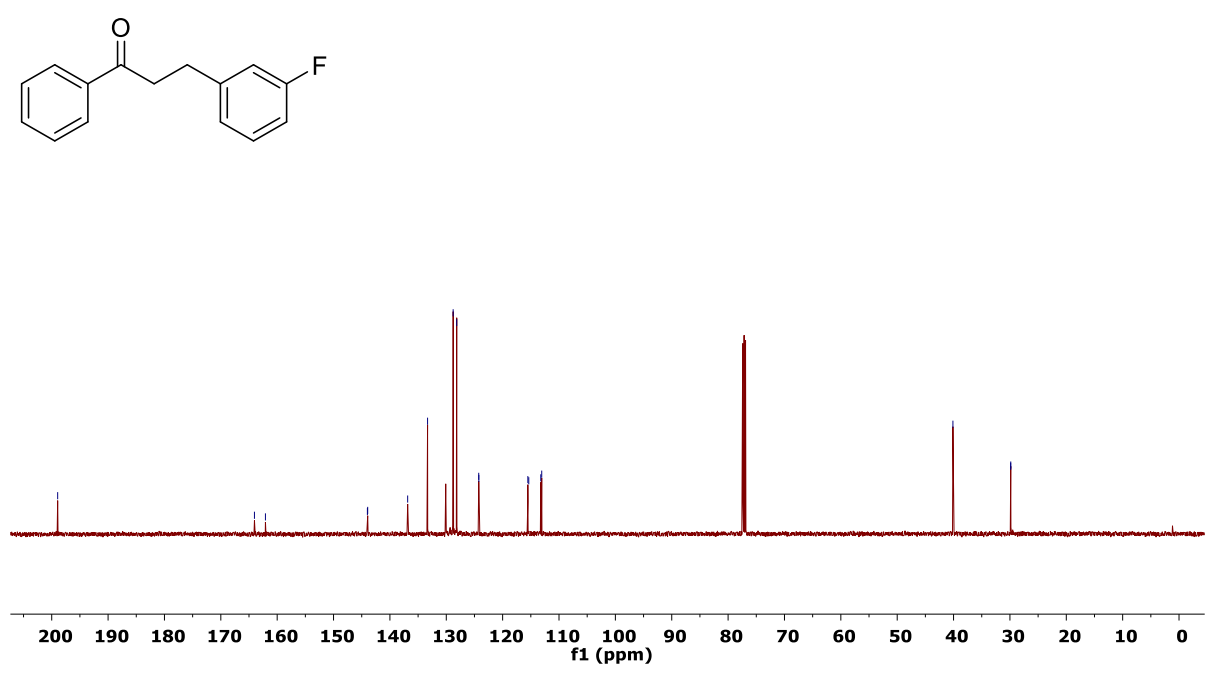

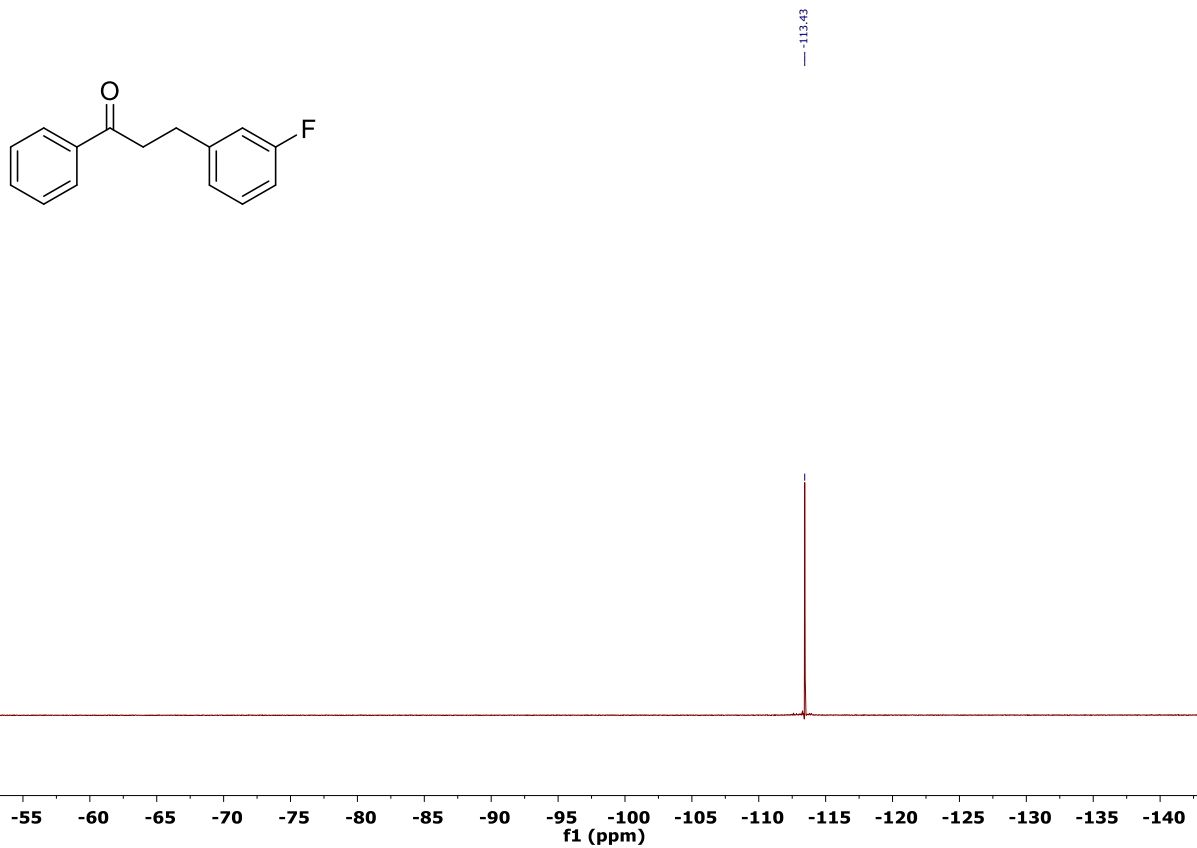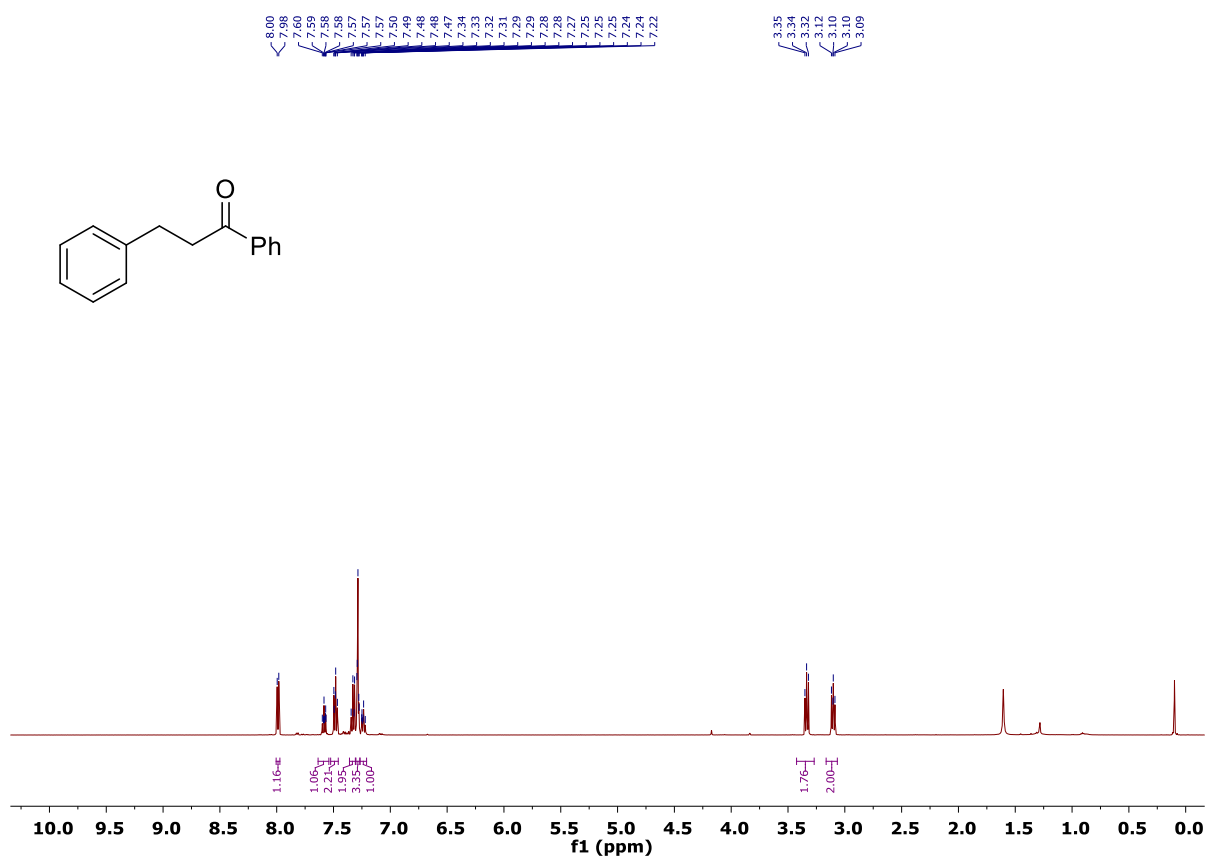

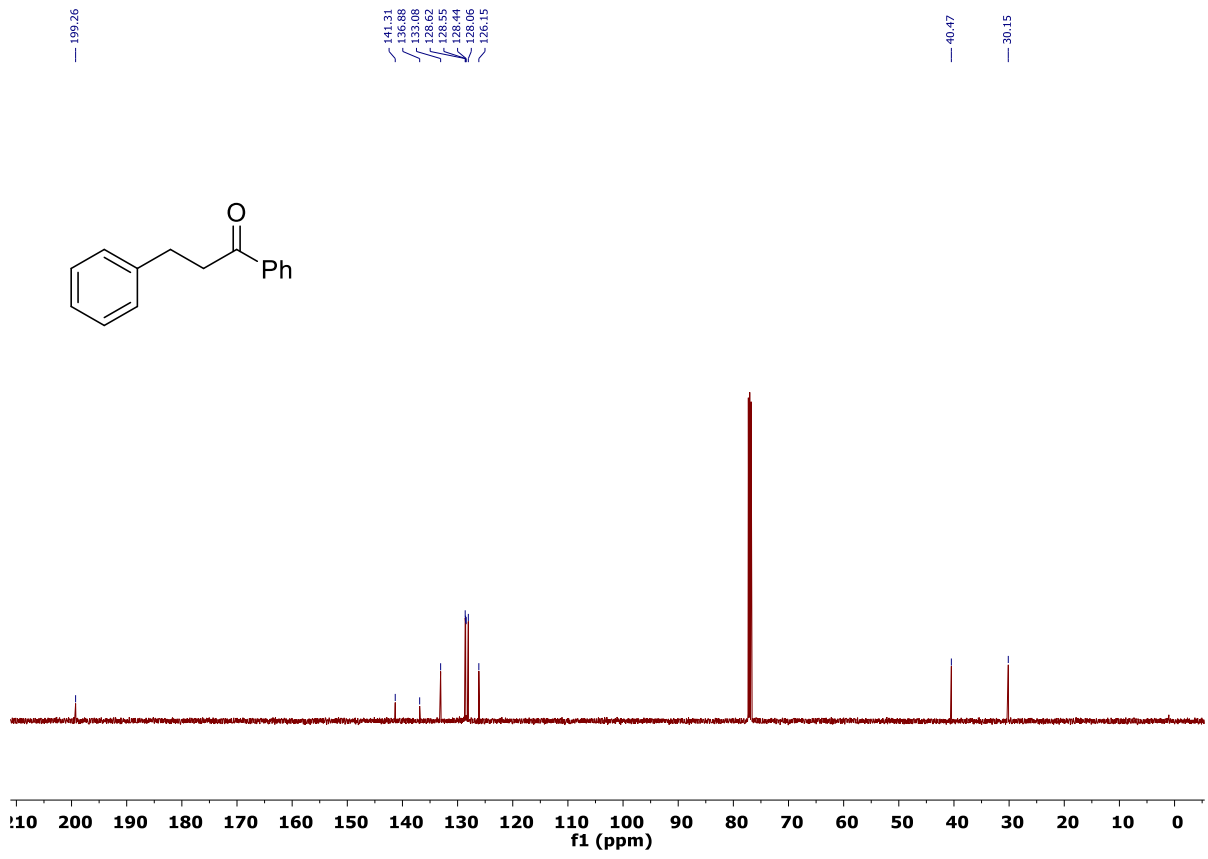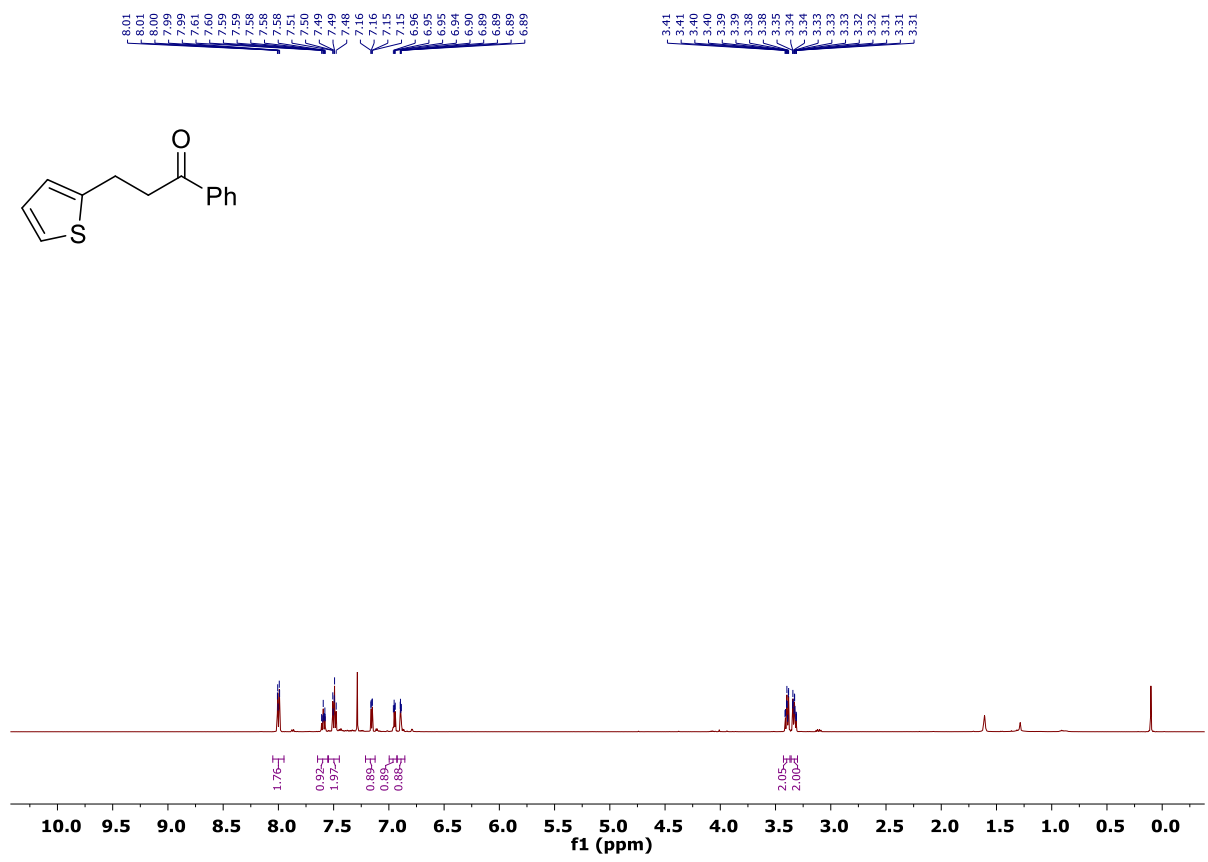



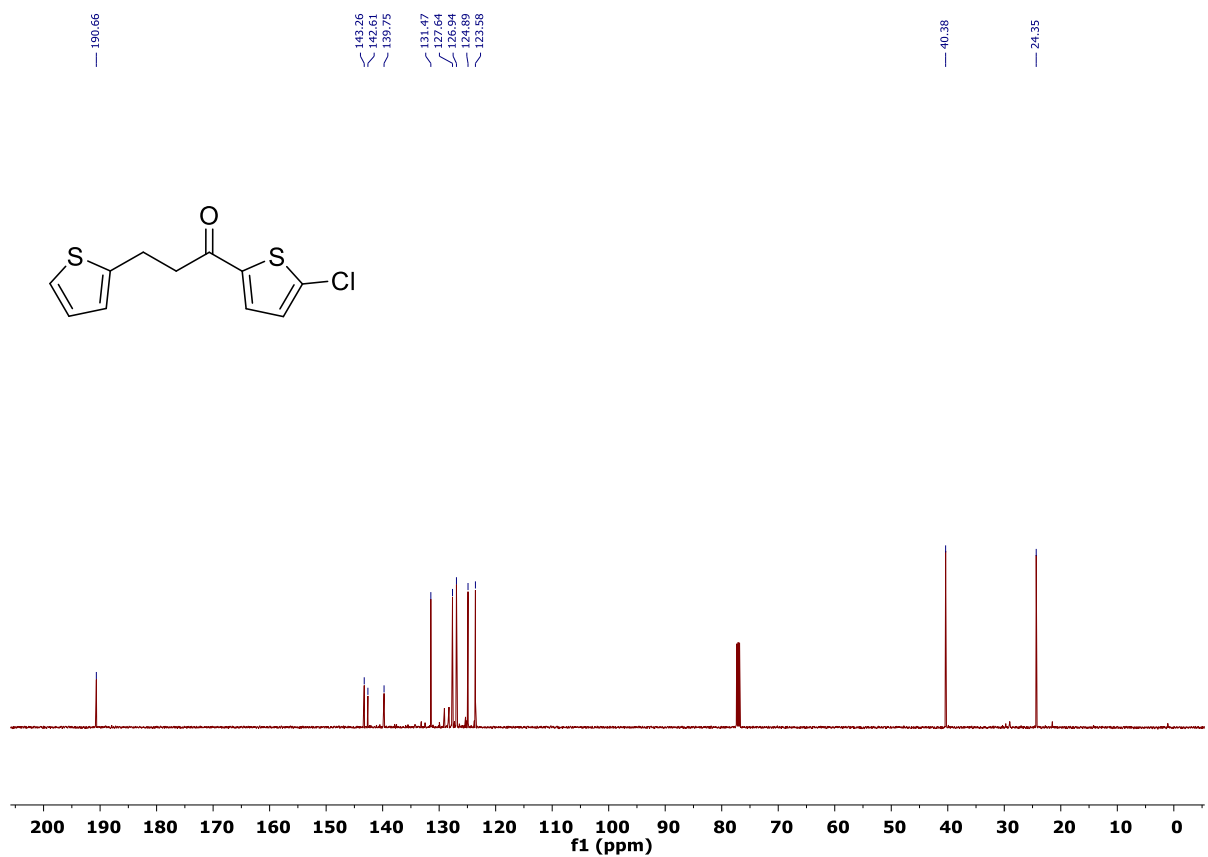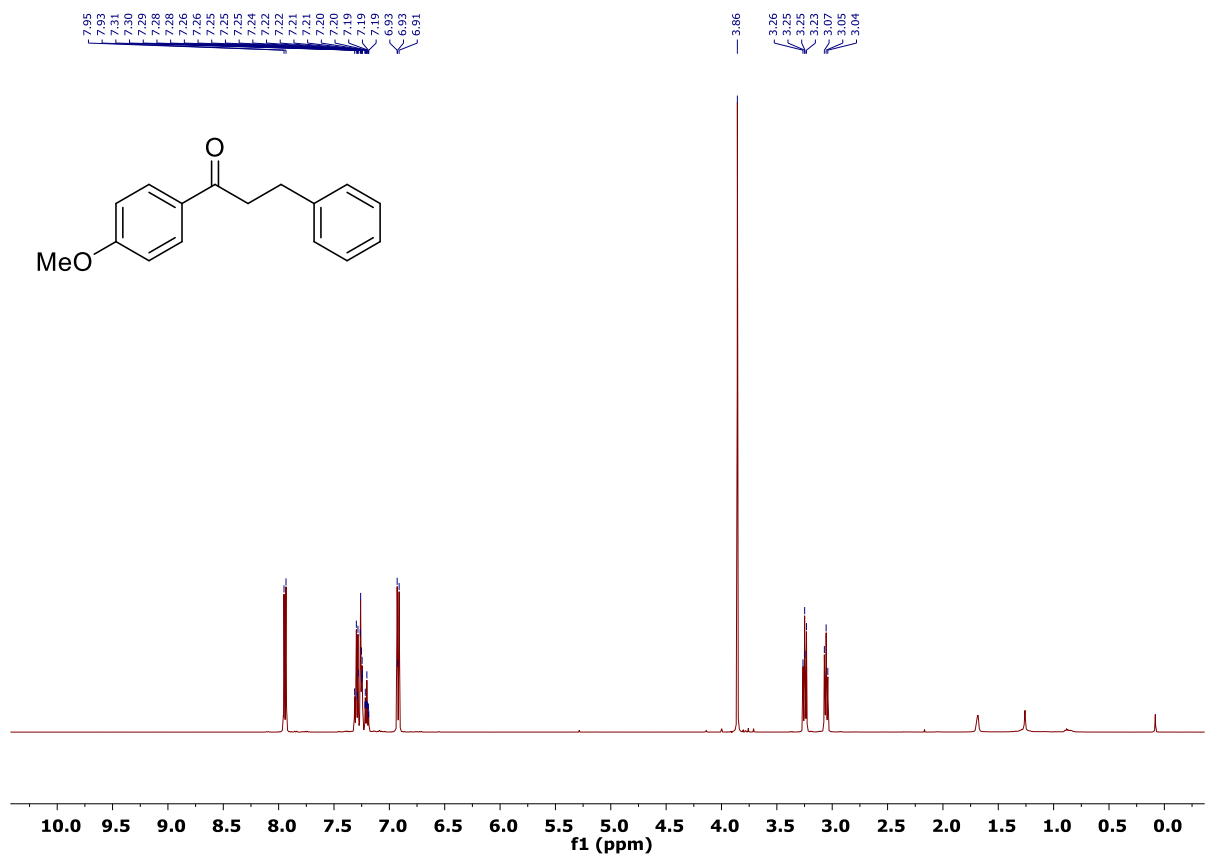

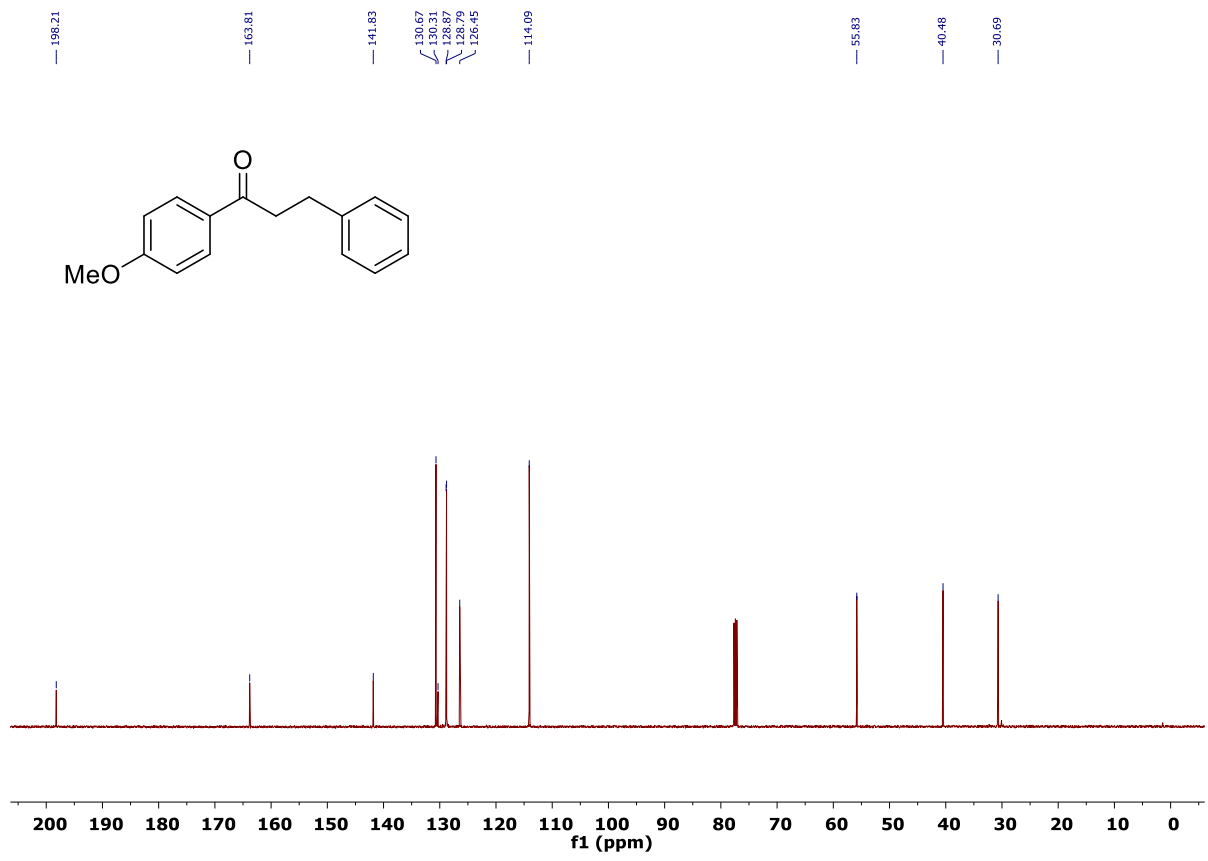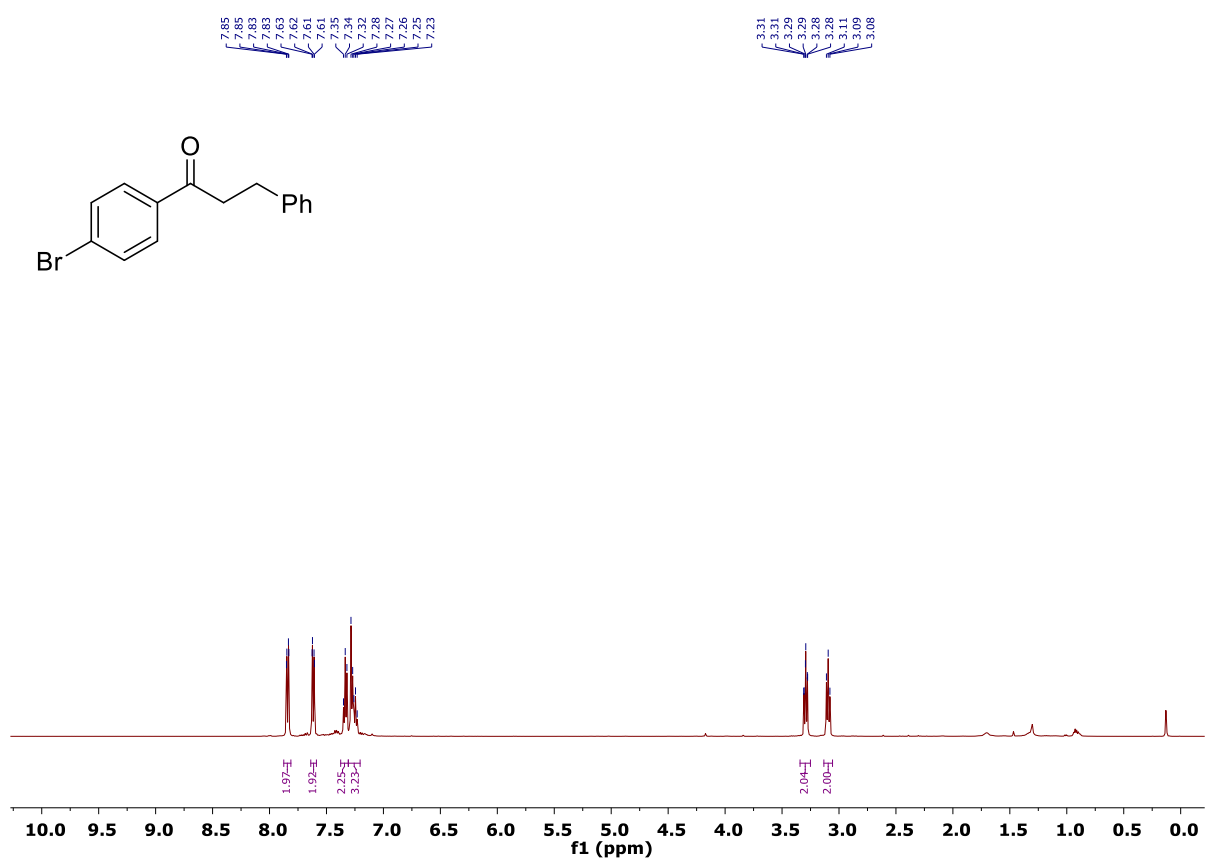

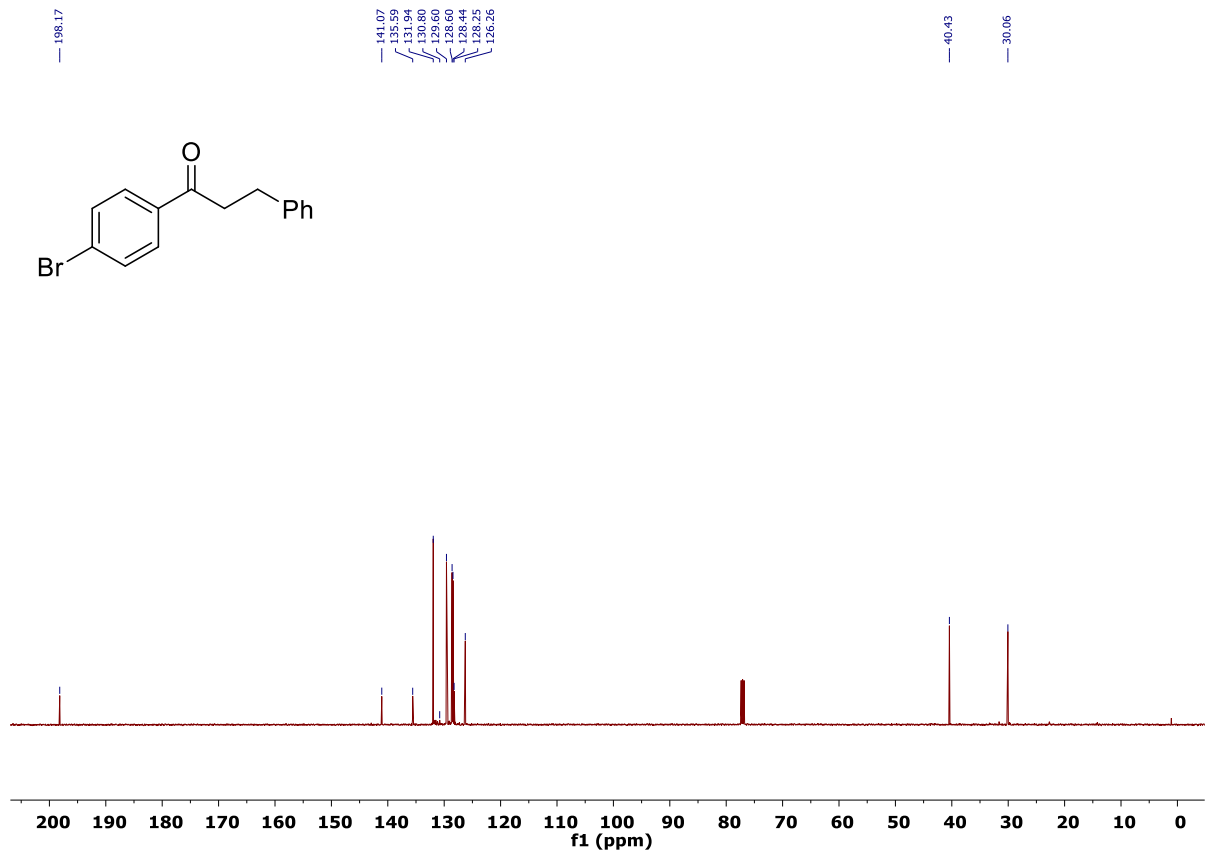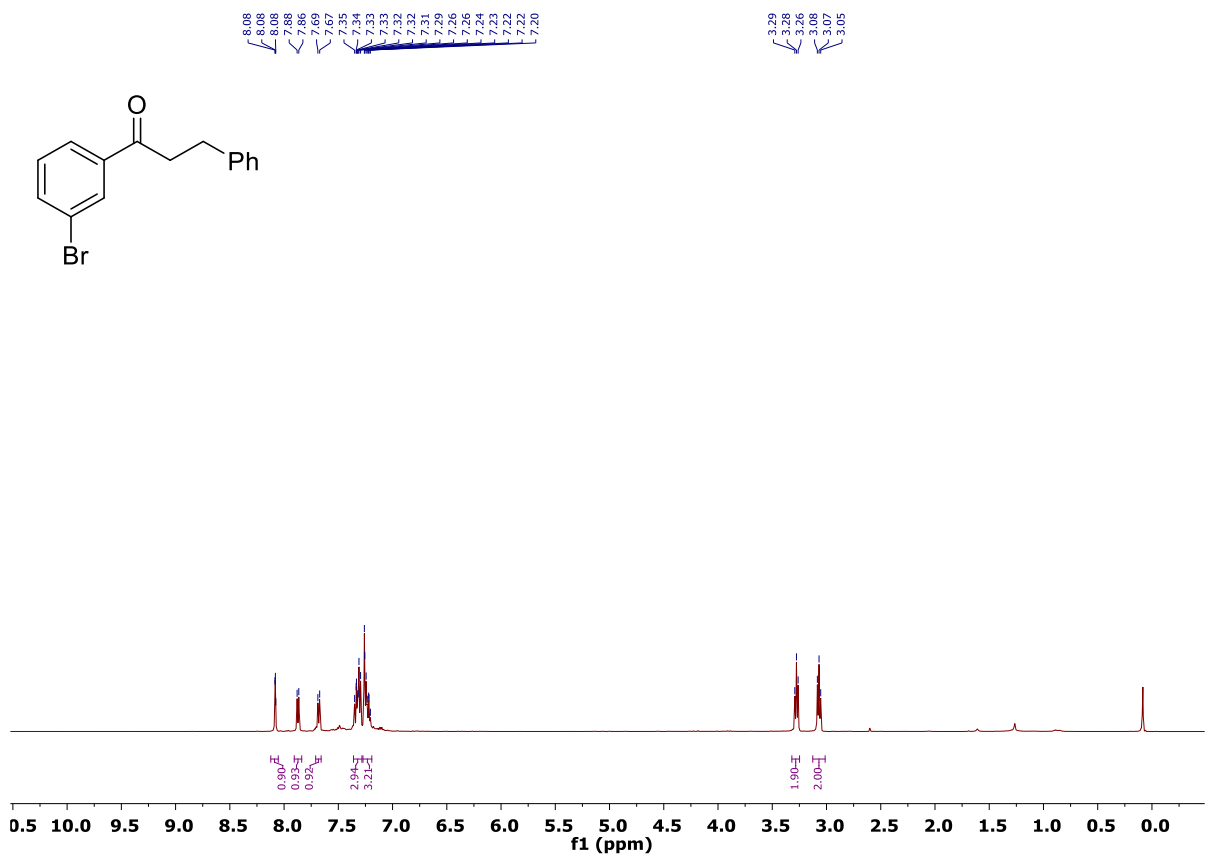

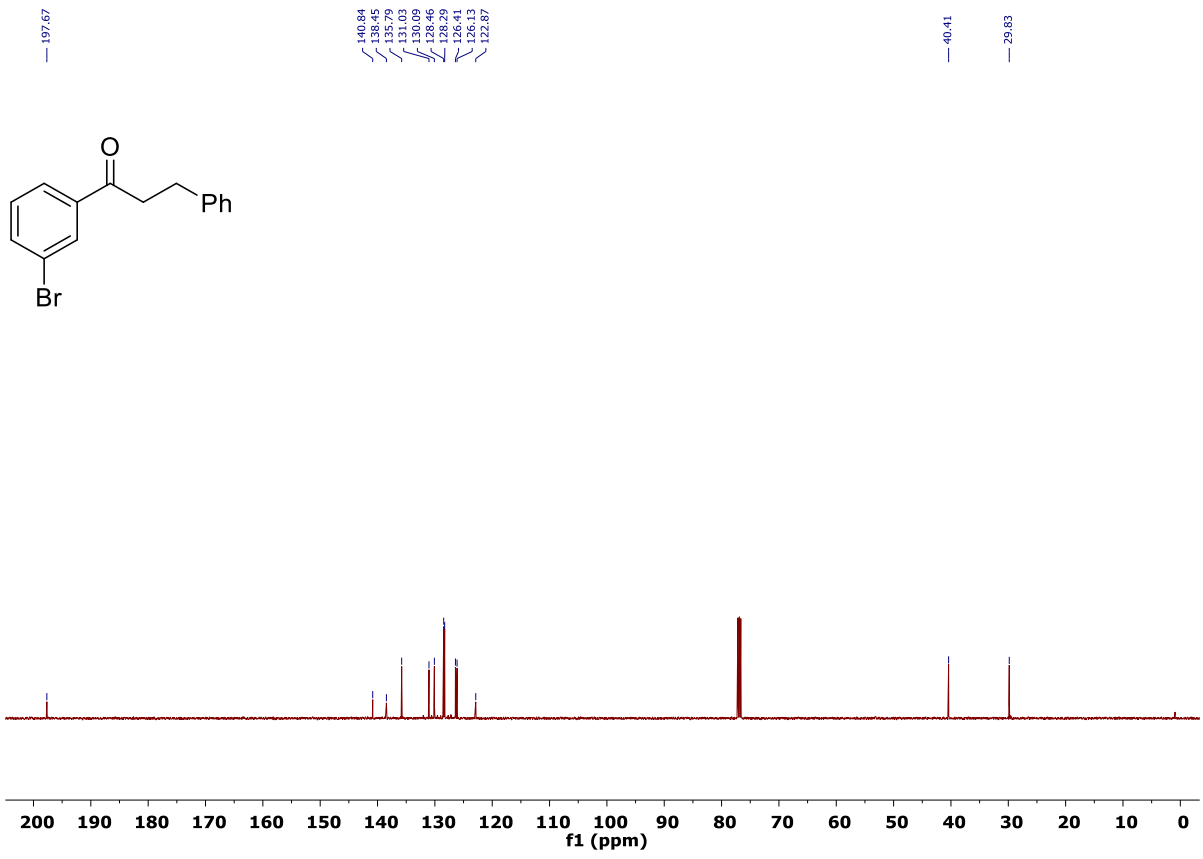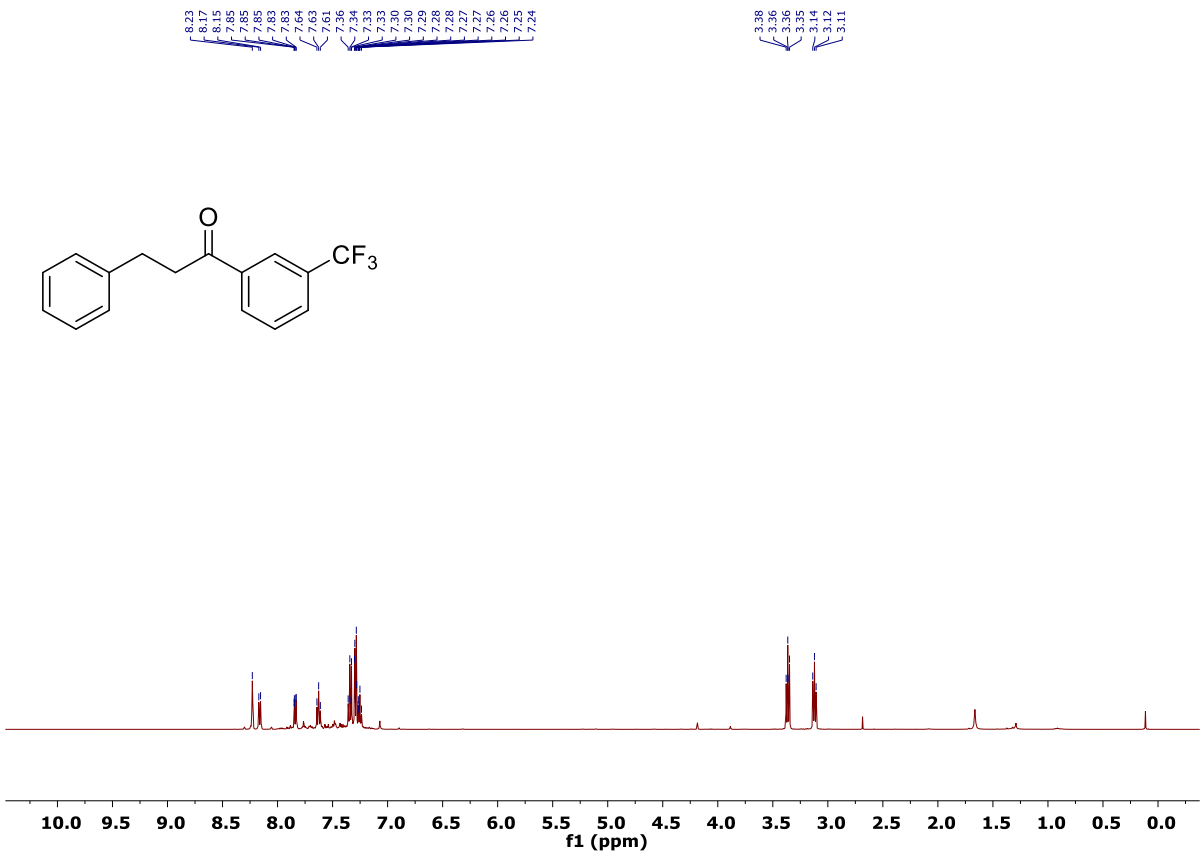



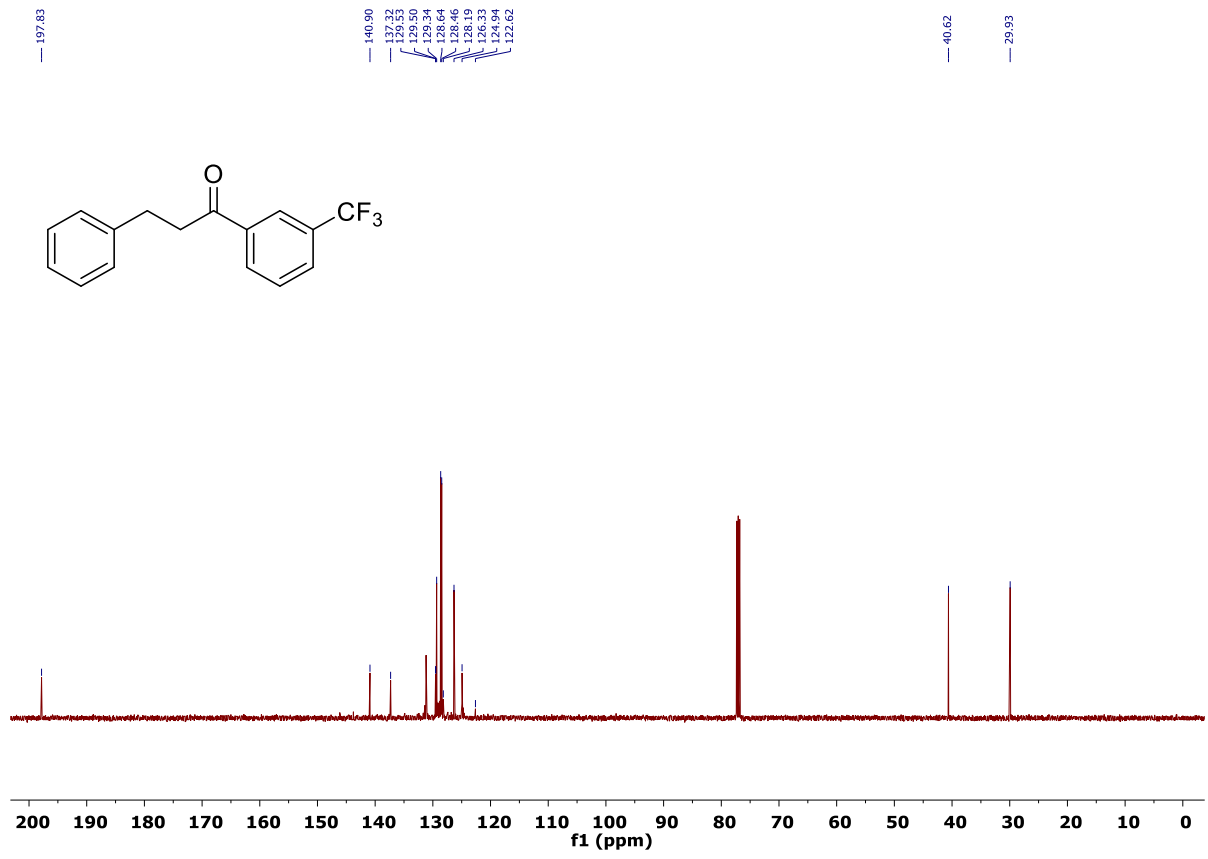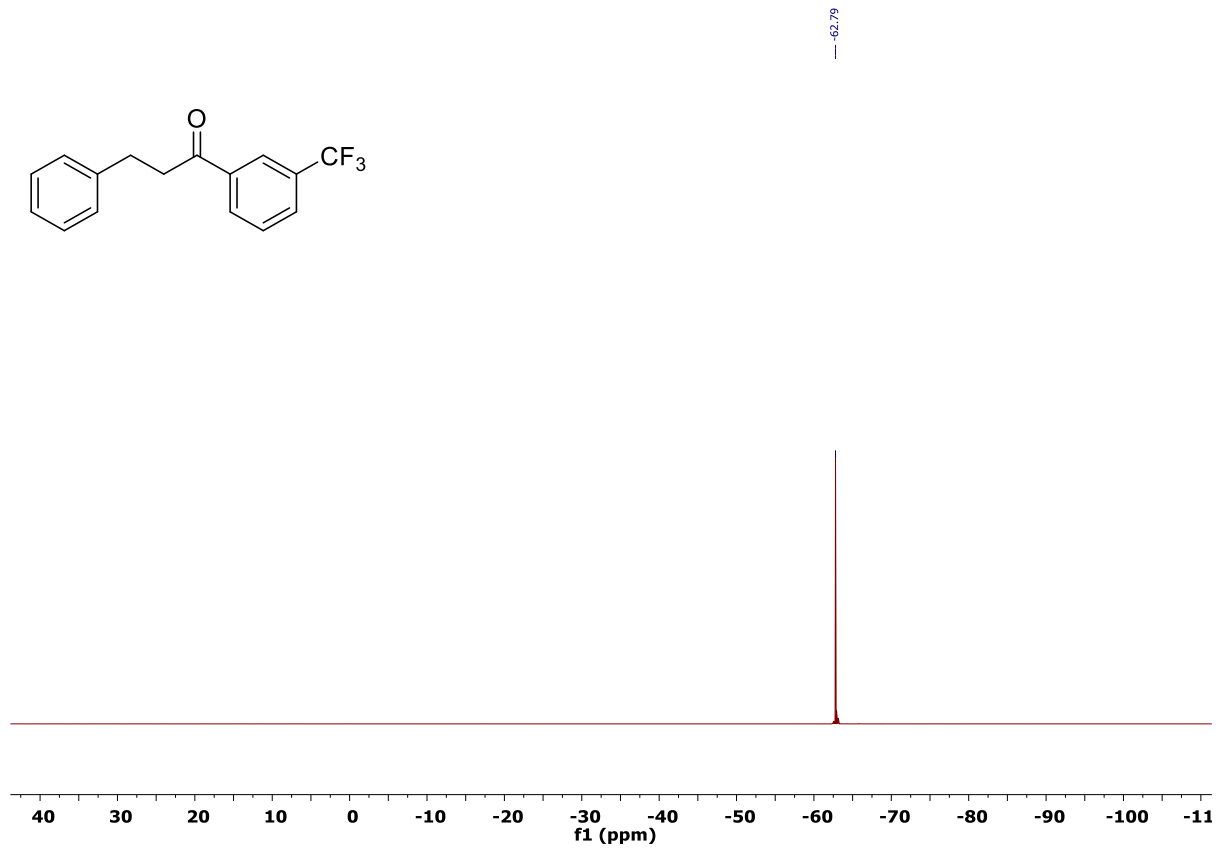

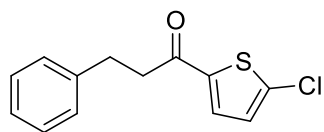

7.48  
7.47  
7.35  
7.33  
7.32  
7.31  
7.28  
7.27  
7.27  
7.26  
7.26  
7.25  
7.24  
6.95  
6.95

3.19  
3.18  
3.18  
3.16  
3.09  
3.08  
3.06  
3.06

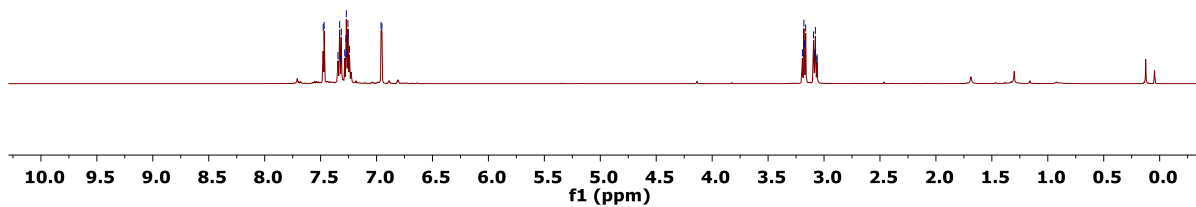

191.31

142.77  
140.77  
139.56  
131.35  
128.62  
128.42  
127.60  
126.33

40.33

30.31

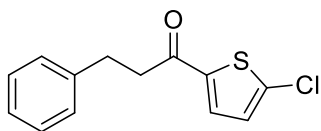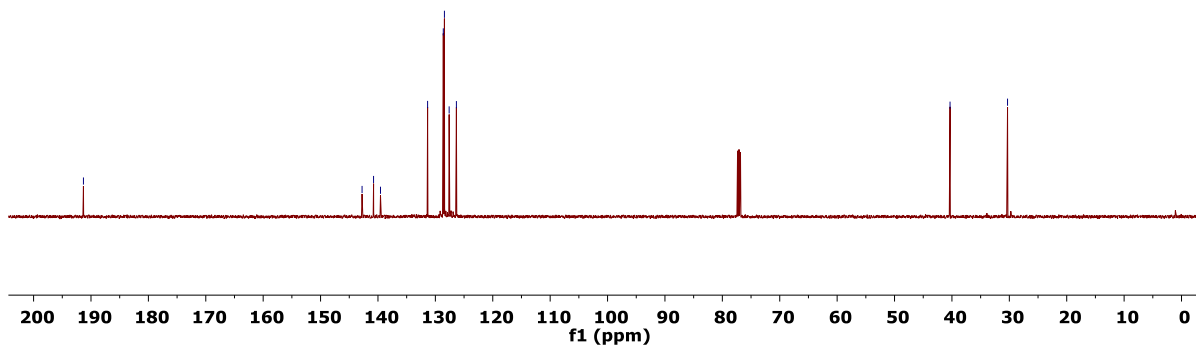

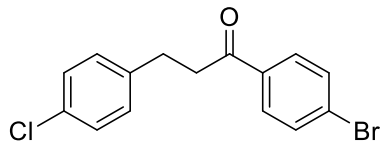

7.84  
7.82  
7.63  
7.61  
7.29  
7.27  
7.20  
7.19

3.28  
3.25  
3.07  
3.06  
3.04

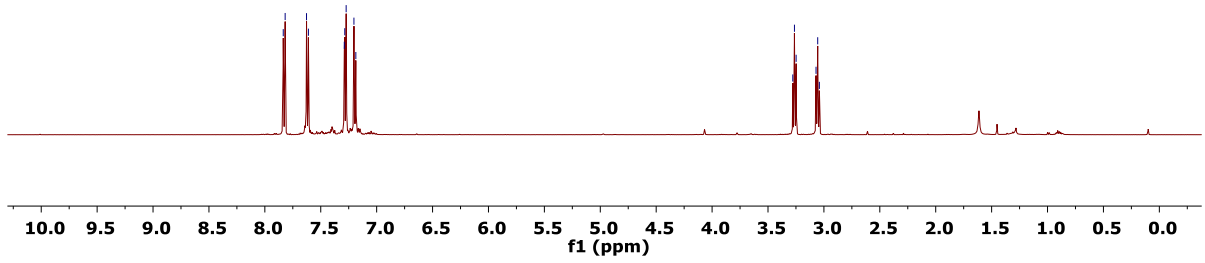

197.80

139.49  
135.46  
131.98  
129.81  
128.54  
128.66  
126.38

40.12

29.28

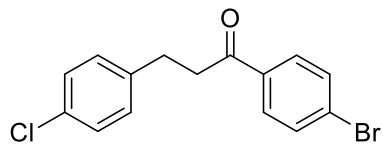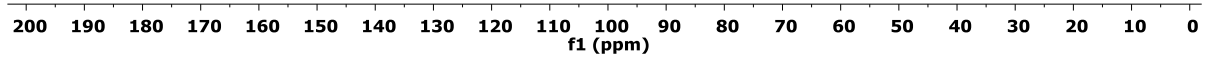

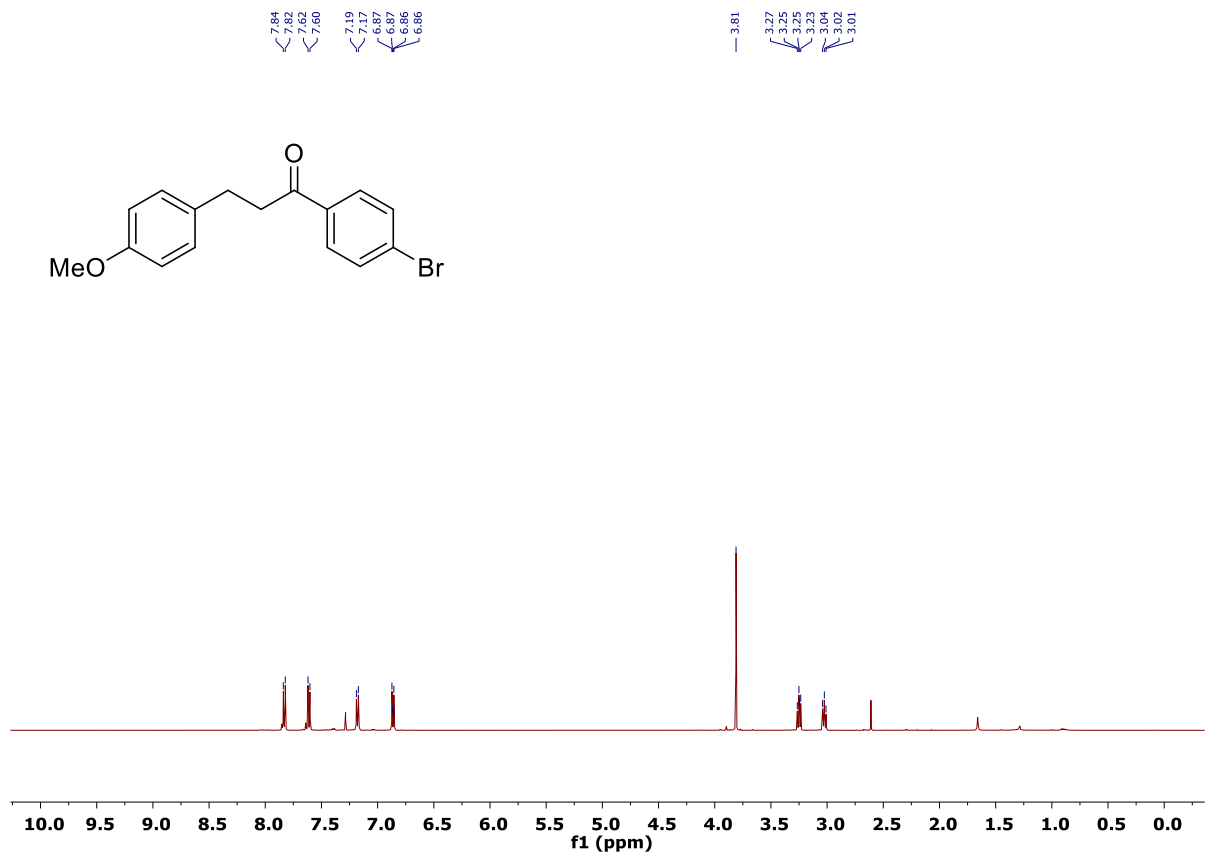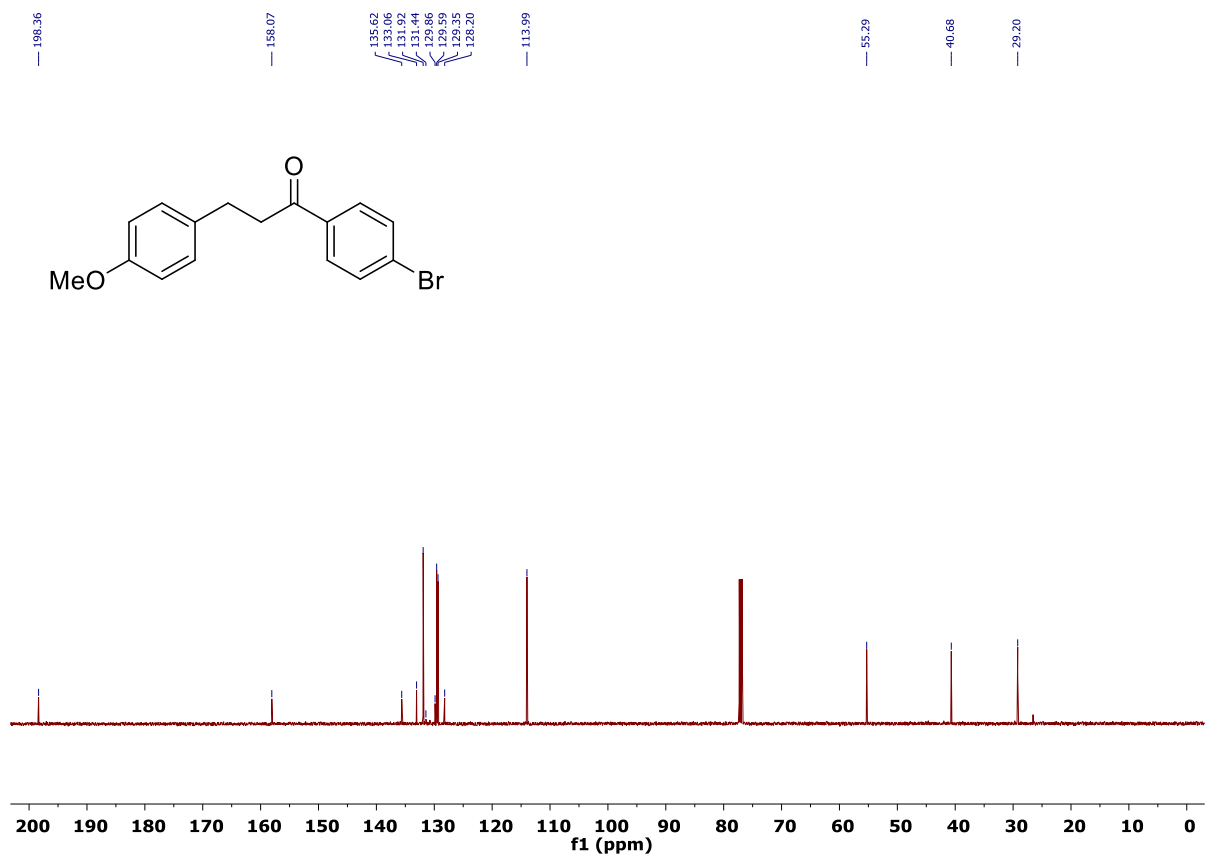

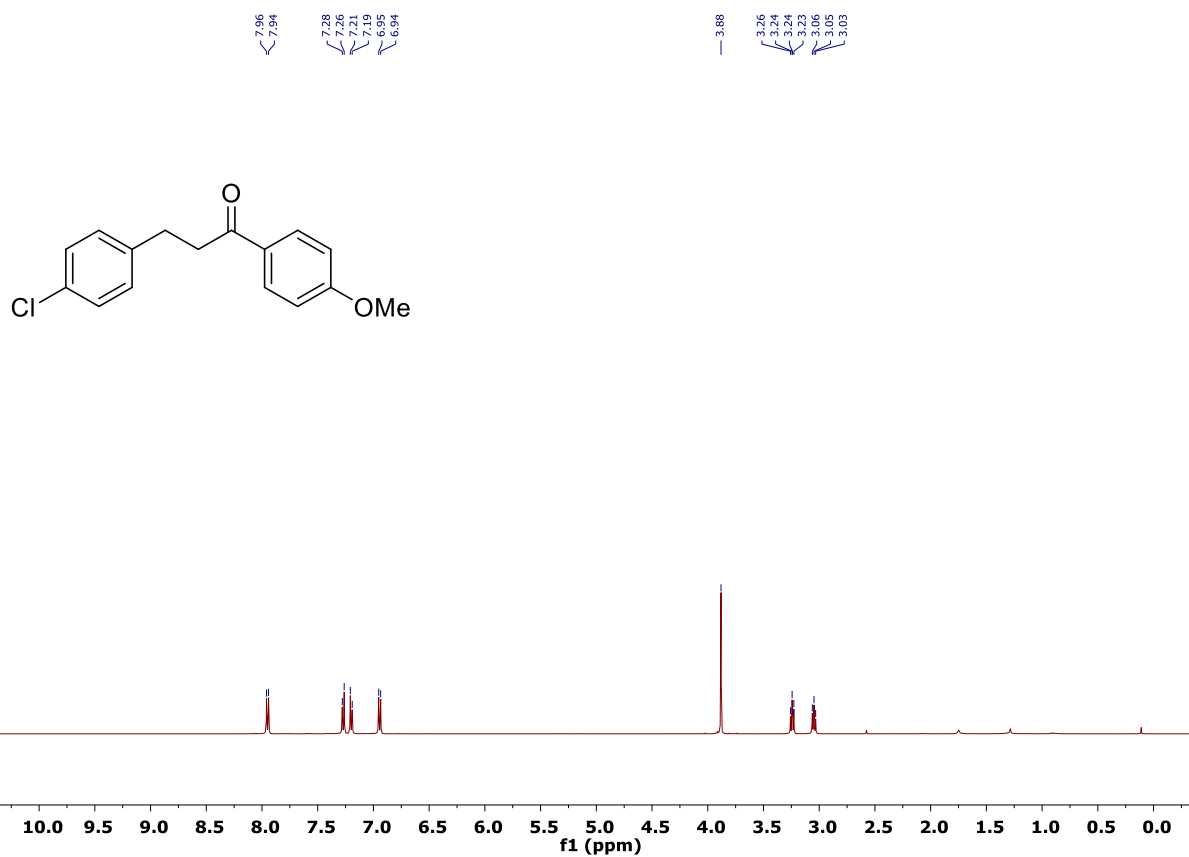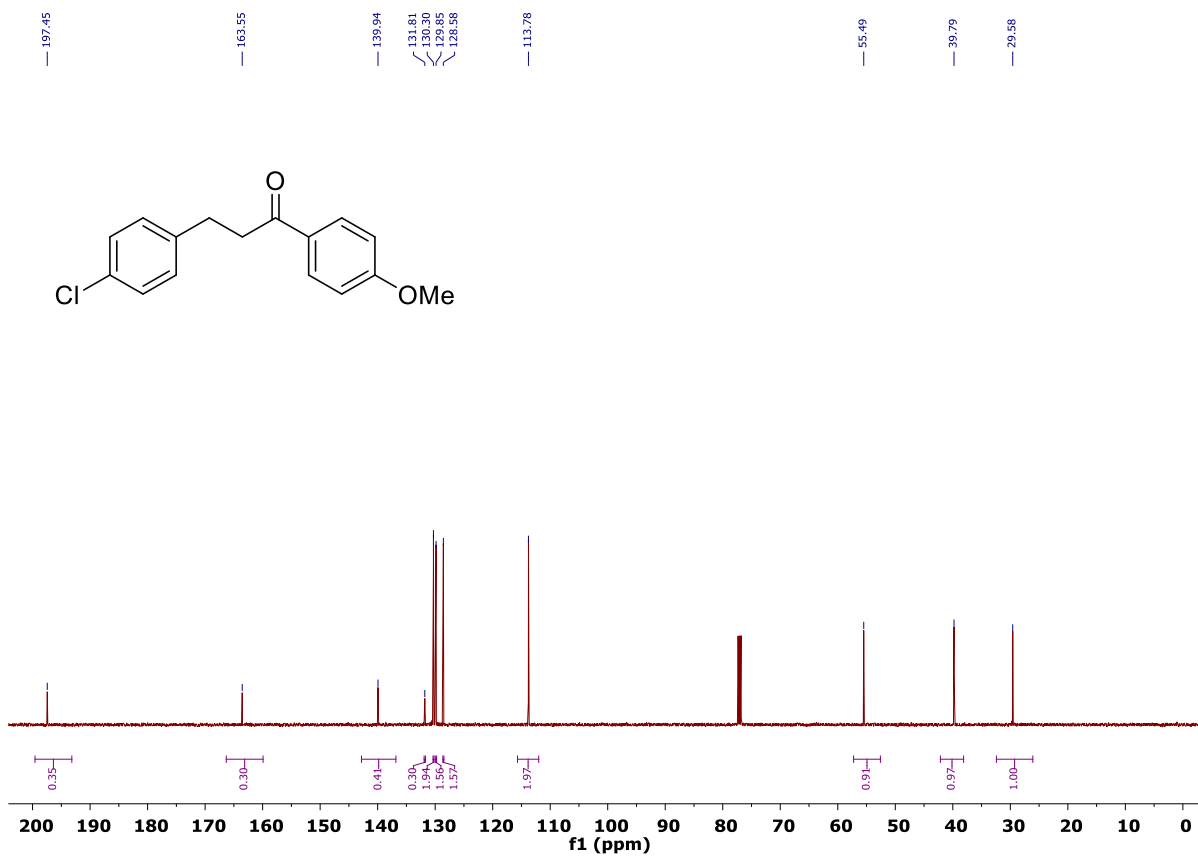

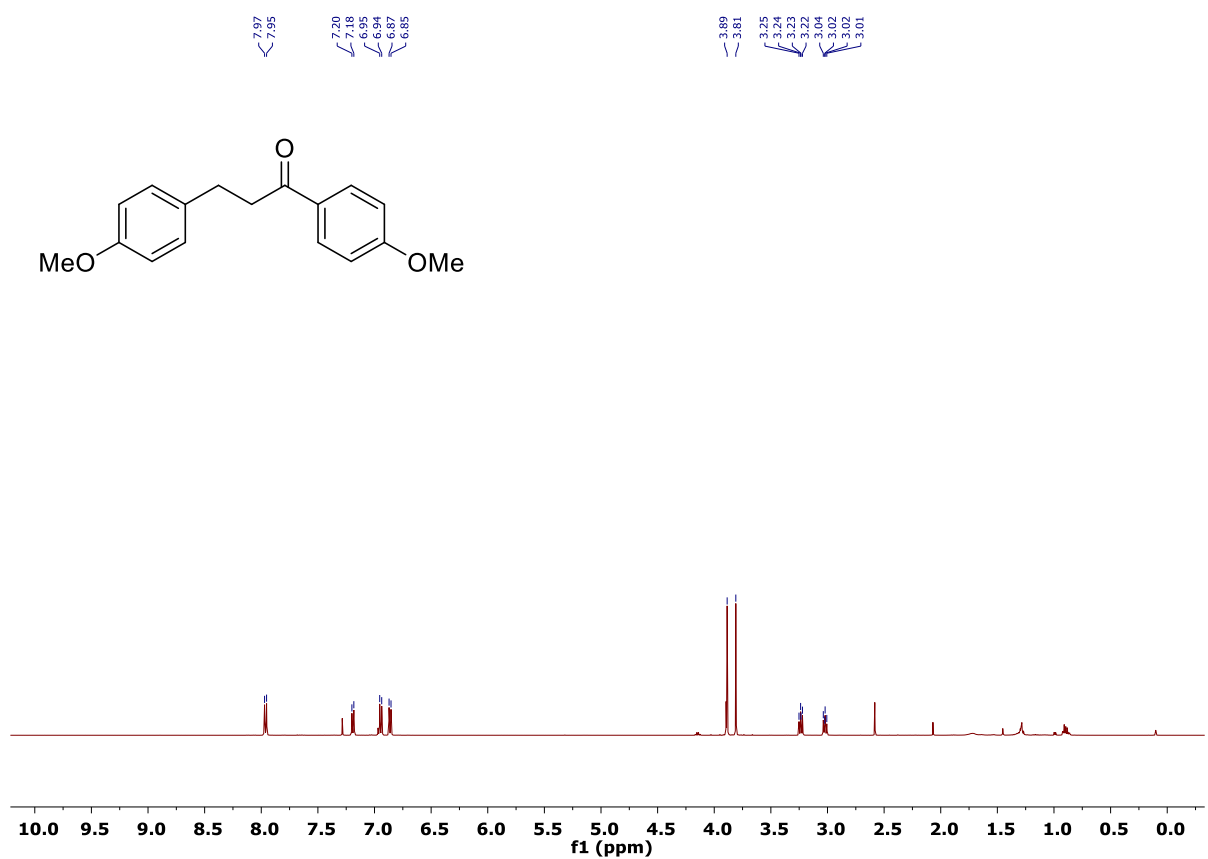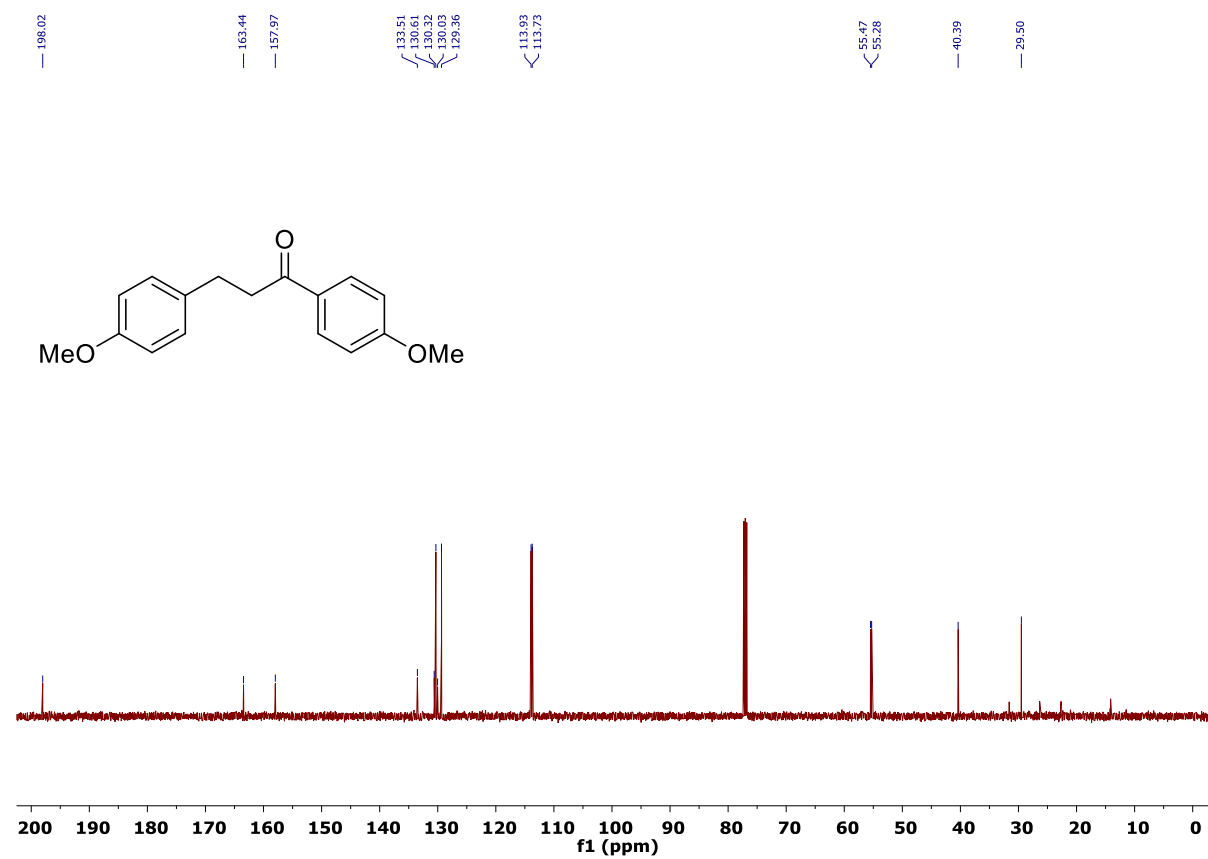

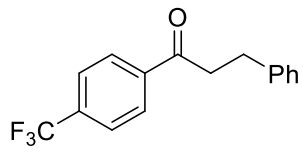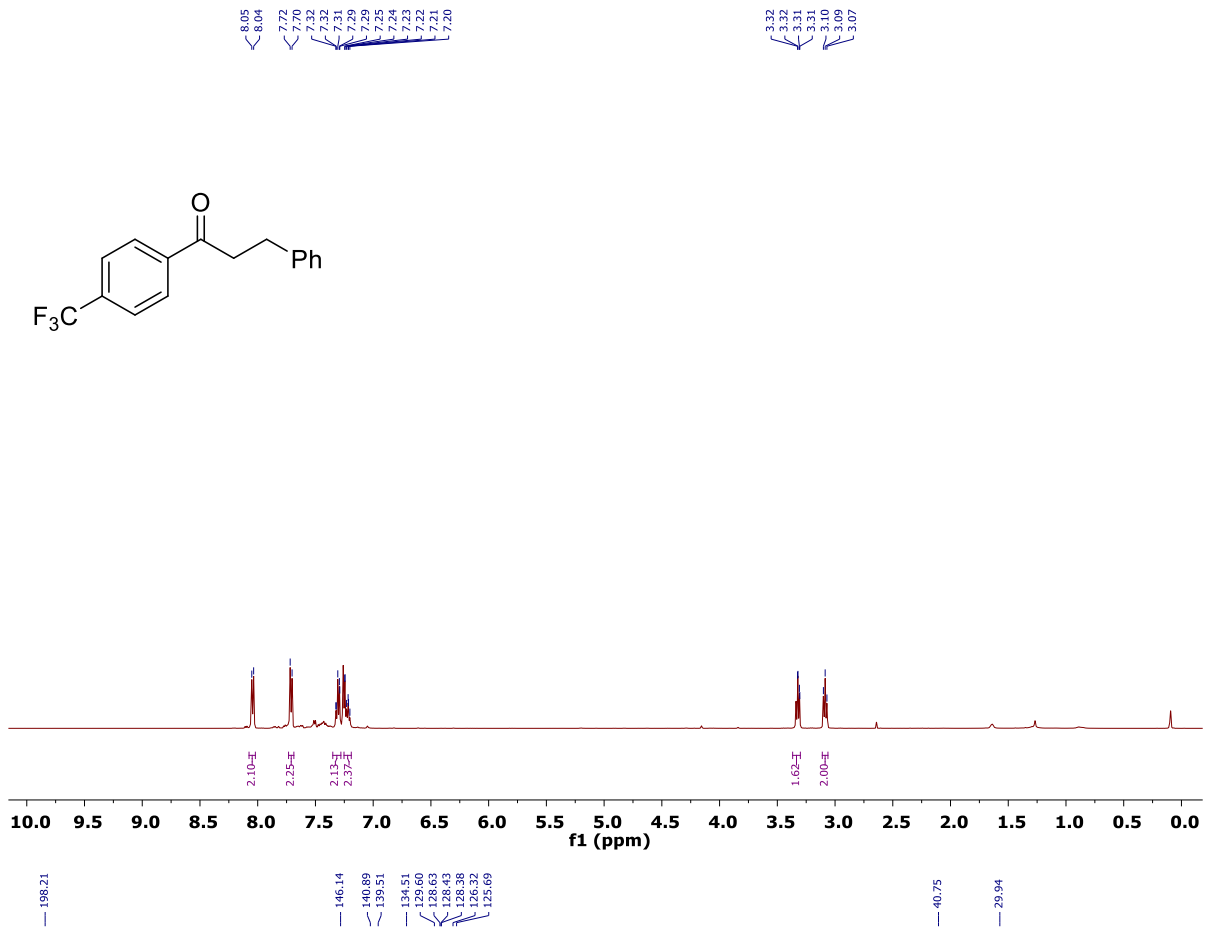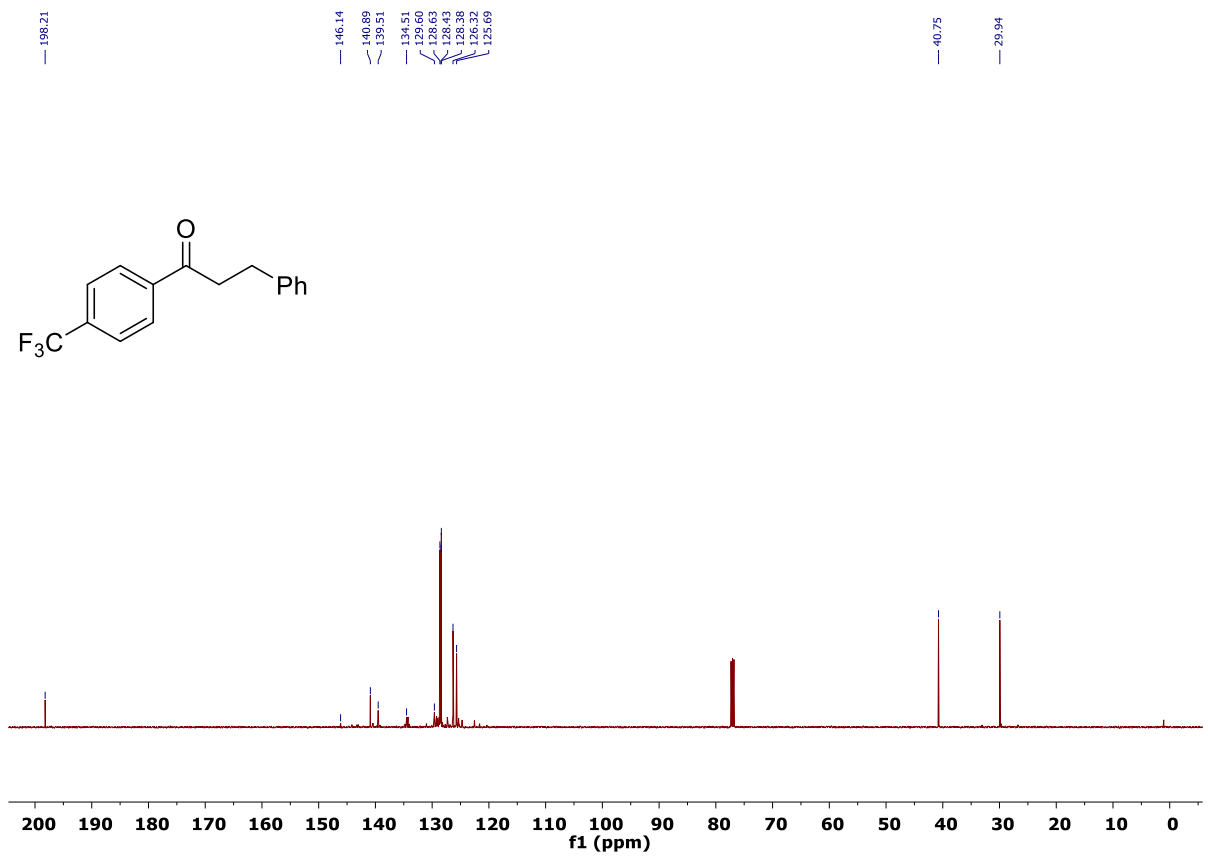

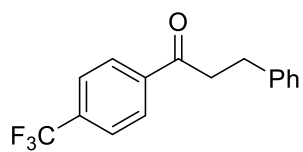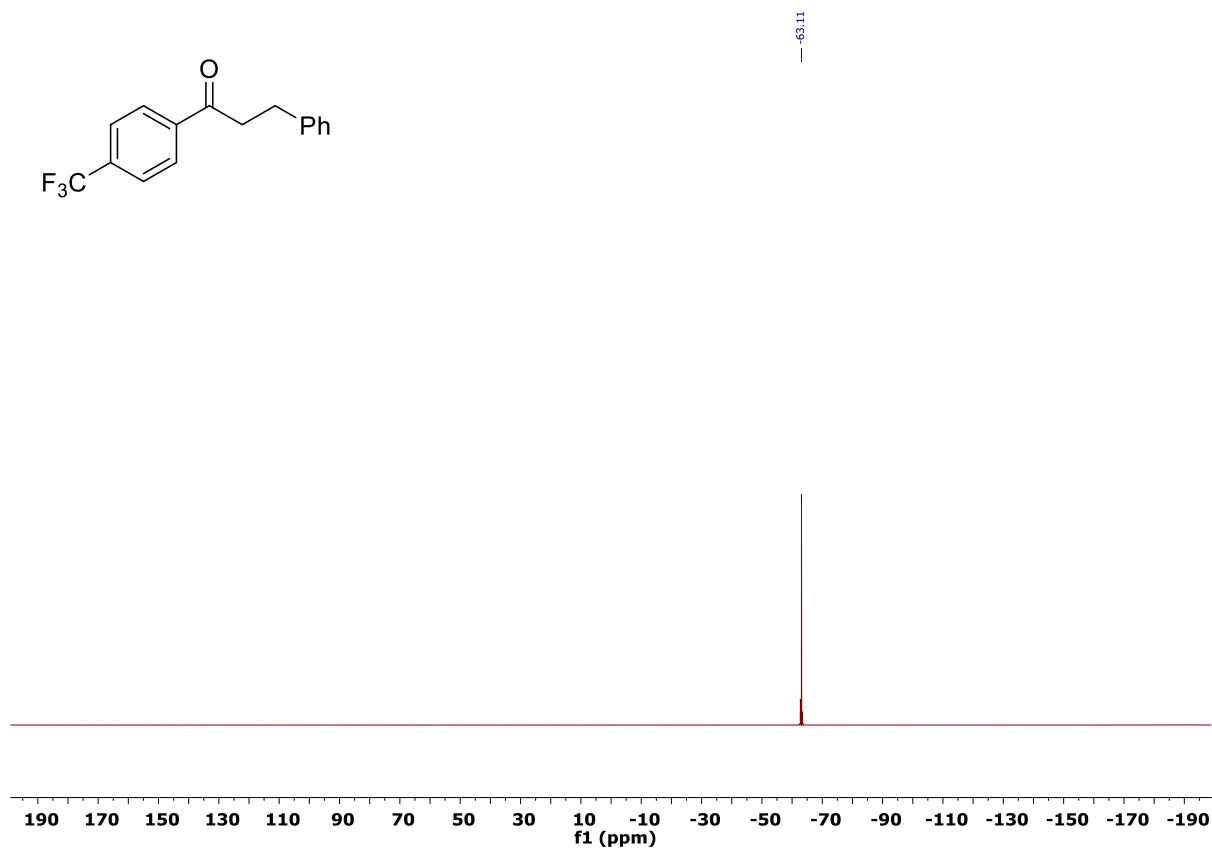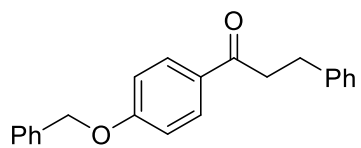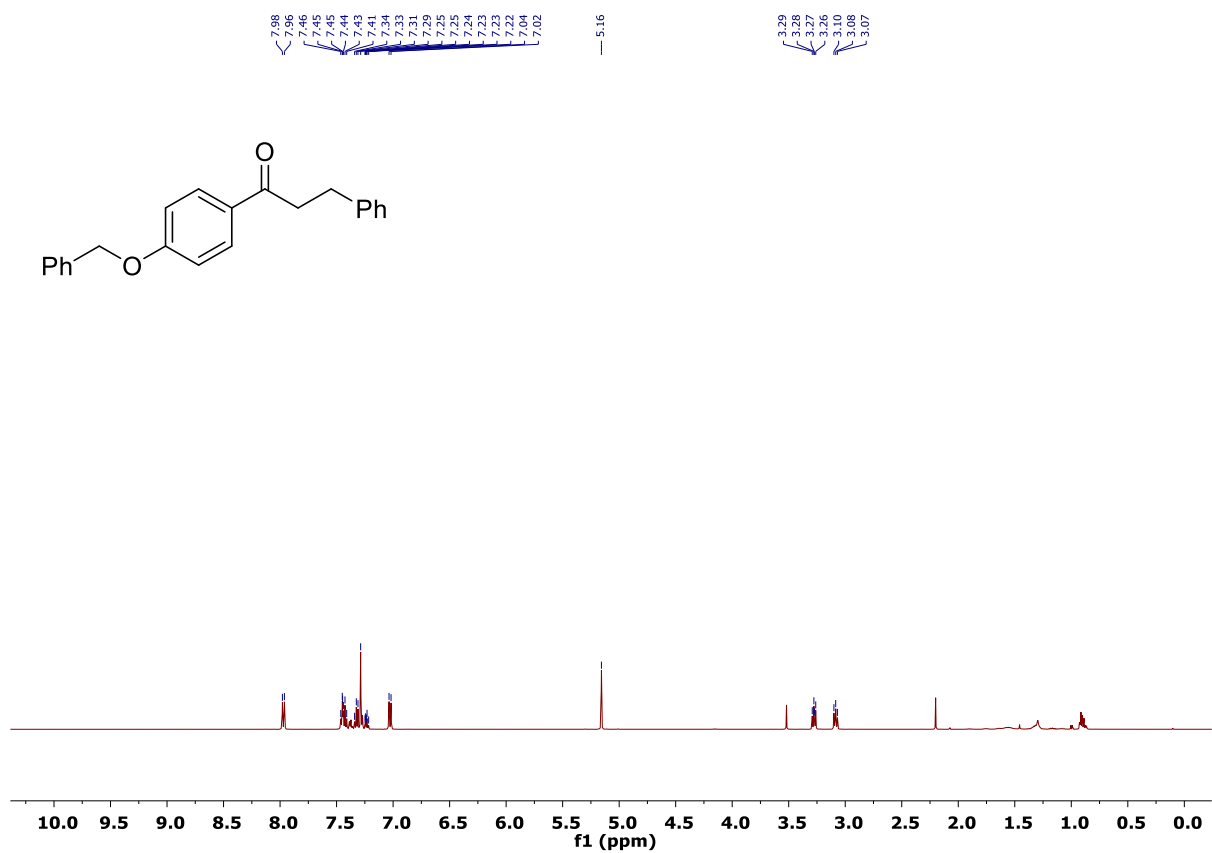



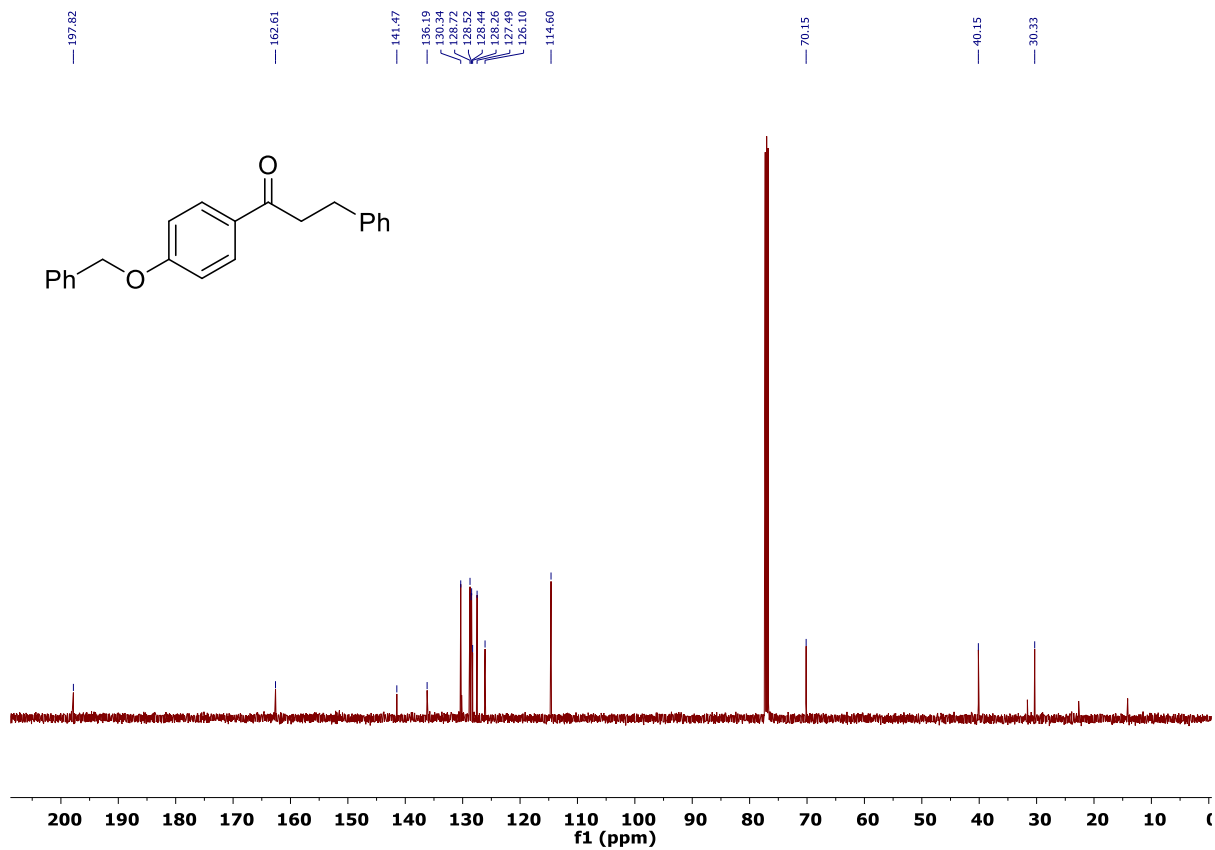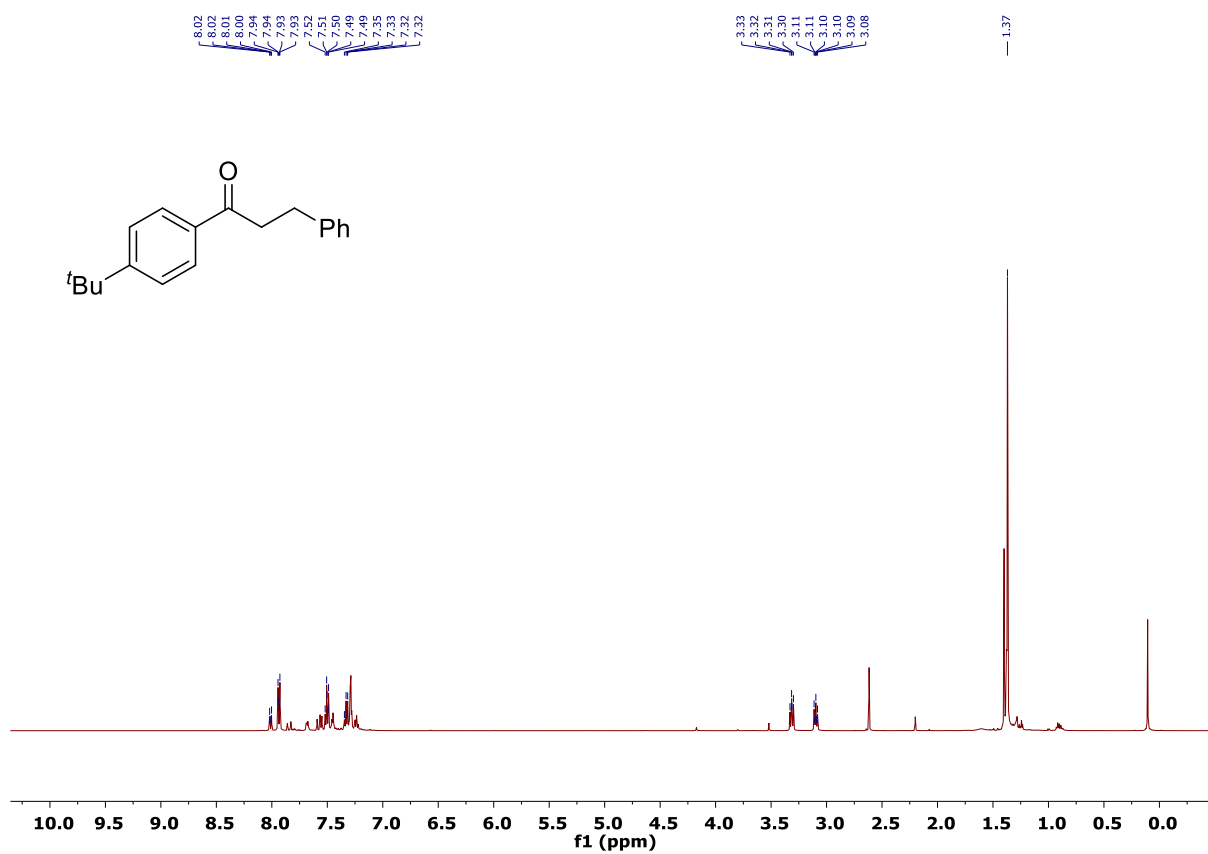

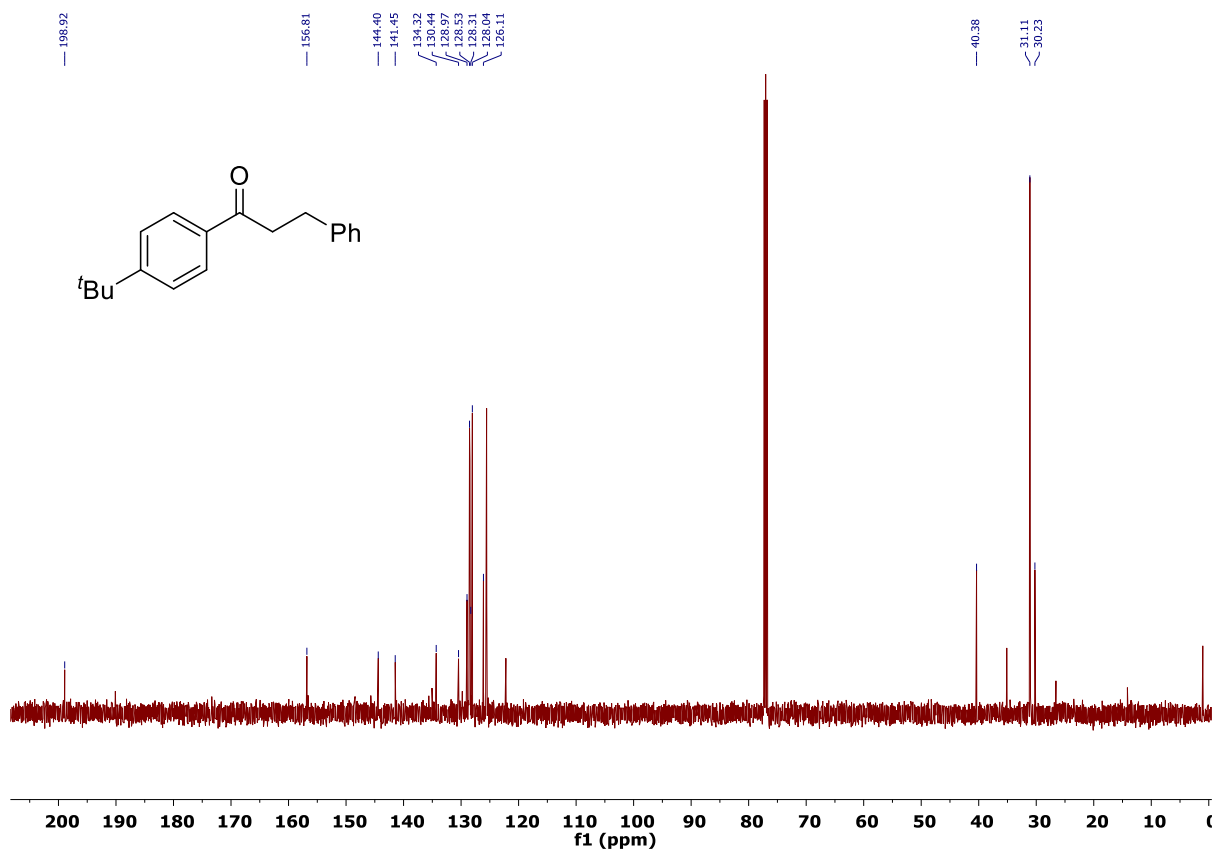

## References:

1. O. V. Dolomanov, L. J. Bourhis, R. J. Gildea, Howard, J.A.K. and H. Puschmann, *J. Appl. Cryst.*, 2009, **42**, 339-341.
2. G. M. Sheldrick, *Acta Cryst.*, 2015, **A71**, 3-8.
3. G. M. Sheldrick, *Acta Cryst.*, 2015, **C71**, 3-8.
4. M. Peña-López, P. Piehl, S. Elangovan, H. Neumann and M. Beller, *Angew. Chem.*, 2016, **128**, 15191–15195.
5. X.-B. Lan, Z. Ye, M. Huang, J. Liu, Y. Liu and Z. Ke, *Org. Lett.*, 2019, **21**, 8065–8070.
6. S. Chakraborty, P. Daw, Y. Ben David and D. Milstein, *ACS catal.*, 2018, **8**, 10300–10305.
7. X.-N. Cao, X.-M. Wan, F.-L. Yang, K. Li, X.-Q. Hao, T. Shao, X. Zhu and M.-P. Song, *J. Org. Chem.*, 2018, **83**, 3657–3668.
8. A. Maji, A. Singh, N. Singh and K. Ghosh, *ChemCatChem.*, 2020, **12**, 3108–3125.
9. P. K. Namdeo, S. Sheokand, B. S. Kote, L. Radhakrishna, H. S. Kunchur, P. Saini, S. Ramakrishnan and M. S. Balakrishna, *Dalton Trans.*, 2022, **51**, 6795–6808.
10. F. Neese, F. Wennmohs, U. Becker and C. Riplinger, *J. Chem. Phys.*, 2020, **22**, 224108.
11. P. J. Hay and W. R. Wadt, *J. Chem. Phys.*, 1985, **1**, 270–283.
12. M. Xiang, N. Li, B. R. King and H. F. Schaefer, *New J. Chem.*, 2014, **38**, 1433–1440.
